# Supplementary material for: Management Strategy Evaluation Applied to Coral Reef Ecosystems in Support of Ecosystem-Based Management
Source: PLoS One. 2016 Mar 29;11(3):e0152577. doi: 10.1371/journal.pone.0152577 (PMC4811577; doi:10.1371/journal.pone.0152577)
Supplement: S5 Table — (XLSX) [file pone.0152577.s006.xlsx]

## Sheet: metrics
BIOMASS OF STANDING STOCK (BIOMINDX) AND CATCHES AFTER 45 YEAR SIMULATION
BIOMINDX	A: Status Quo	Biii: Size Limit	Bii: Bag Limit	Bi: Size&Bag limit	D: Size&Bag&WQ	C: SQ&Watershed	E: Full Regulations	F: No drivers		Status Quo	Bag&Size limit	Bag limit	Size limit	Watershed Rest.	Bag&Size&Watershed Rest.	Full Regulations	No fishing & Restored Watersheds		Status Quo	Size-based	Bag Limit	Size&Bag limit	Size&Bag&WQ	SQ&Watershed	Full Regulations	No drivers			normalized	Status Quo	Size-based	Bag Limit	Size&Bag limit	Size&Bag&WQ	Status quo&WQ	Full Regulations	No drivers		total effect size	Status Quo	Size-based	Bag Limit	Size&Bag limit	Size&Bag&WQ	Status quo&WQ	Full Regulations	No drivers
total reef-fish biomass	3412.07	3445.42	4154.18	4113.85	4653.73	3822.8	5355.54	5309.07	total reef-fish biomass	1	1.20568	1.2175	1.00977	1.12038	1.3639	1.56959	1.55597	total reef-fish biomass	0	0.00977372	0.217495	0.205676	0.363904	0.120376	0.569587	0.555969	4283.33	761.358	species abundance	0.126238	0.135546	0.432648	0.41192	0.686694	0.272629	0.920476	0.911051		mean	0.392436	0.354988	0.514789	0.467106	0.595052	0.532511	0.627816	0.56851
landings targeted groups	127.849	132.868	102.432	100.275	102.608	141.168	101.218	0	landings targeted groups	1	0.784325	0.801198	1.03926	1.10418	0.802576	0.791704	0	landings targeted fish groups	0	0.0392582	-0.198802	-0.215675	-0.197424	0.104182	-0.208296	-1	101.052	44.0066	landings targeted fish groups	0.72871	0.765151	0.512507	0.492953	0.514103	0.819007	0.501505	0.0108294		se	0.111925	0.0993219	0.0569942	0.0537164	0.0497382	0.119279	0.063861	0.15263
total landings	280.412	188.623	177.202	141.098	138.671	277.579	134.747	0	total landings	1	0.503182	0.631935	0.672666	0.989898	0.494527	0.480533	0	total landings	0	-0.327334	-0.368065	-0.496818	-0.505473	-0.0101021	-0.519467	-1	167.292	89.4935	total landings	0.896886	0.5942	0.544089	0.384882	0.374559	0.891091	0.358058	0.0307895
calcifiers:non-calcifiers	0.863857	0.829016	0.841727	0.822769	1.22326	1.29267	1.22596	1.15437	reef condition	1	0.952436	0.974382	0.959668	1.4964	1.41604	1.41916	1.33629	reef condition	0	-0.0403323	-0.0256176	-0.047564	0.416038	0.496397	0.419165	0.336292	1.0317	0.209277	reef condition	0.211269	0.166395	0.182	0.159052	0.819985	0.893804	0.823352	0.721105
biomass herb. other	987.62	990.328	1220.37	1188.86	1122.31	962.591	1133.77	1344.27	biomass herb. other	1	1.20376	1.23567	1.00274	0.974658	1.13638	1.14799	1.36112	biomass browser,grazer	0	0.00274199	0.235669	0.203761	0.136377	-0.0253421	0.147986	0.361121	1118.76	133.316	biomass herb. other	0.162628	0.167673	0.777013	0.700475	0.510601	0.120709	0.544818	0.95463
biomass parrotfishes	843.757	838.076	958.339	952.165	972.127	869.547	973.784	1042.84	biomass parrotfishes	1	1.12848	1.1358	0.993267	1.03057	1.15214	1.1541	1.23595	biomass parrotfishes	0	-0.00673303	0.135799	0.128483	0.152141	0.0305659	0.154105	0.235953	931.33	72.9463	biomass parrotfishes	0.114971	0.100556	0.644404	0.612417	0.712013	0.198508	0.719713	0.936833
biomass targeted groups	1815.64	1814.27	2445.98	2405.04	2606.32	1942.65	2633.53	3315.24	biomass targeted groups	1	1.32462	1.34717	0.999246	1.06995	1.43548	1.45047	1.82593	biomass targeted groups	0	-0.00075403	0.347169	0.324622	0.435477	0.0699503	0.450468	0.825933	2372.34	510.533	biomass targeted groups	0.137766	0.137176	0.557349	0.525541	0.676633	0.199994	0.695541	0.96762
total fish landings	156.987	159.164	113.881	111.307	113.542	178.316	112.611	0	total fish landings	1	0.709024	0.725417	1.01387	1.13587	0.723256	0.717324	0	total fish landings	0	0.0138679	-0.274583	-0.290976	-0.276744	0.135866	-0.282676	-1	118.226	54.6244	total fish landings	0.761021	0.773206	0.468301	0.449606	0.465832	0.864347	0.45906	0.015219
Tlcom	2.84797	2.85178	2.84461	2.84904	2.93423	2.90718	2.93408	2.95401	Tlcom		1.00038	0.998823	1.00134	1.02079	1.03029	1.03023	1.03723
Tlcatch	3.01746	3.02936	2.98438	2.99184	3.02658	3.0948	3.02549	0
BIOMINDX	Status Quo	Size-based	Bag Limit	Size&Bag limit	Size&Bag&WQ	SQ&Watershed	Full Regulations	No drivers		Status Quo	Size-based	Bag Limit	Size&Bag limit	Size&Bag&WQ	Watershed	Full Regulations	No drivers		Status Quo	Size-based	Bag Limit	Size&Bag limit	Size&Bag&WQ	Watershed	Full Regulations	No drivers	mean	SD	normalized	Status Quo	Size limit	Catch limit	Size&Catch limit	Size&Catch limit &No LBSP	Status Quo&No LBSP	Full Regulations	No drivers	objective	Status Quo	Size-based	Bag Limit	Size&Bag limit	Size&Bag&WQ	StatusQuo&WQ	Full regulations
reef condition	0.863857	0.829016	0.841727	0.822769	1.22326	1.29267	1.22596	1.15437	reef condition	1	0.959668	0.974382	0.952436	1.41604	1.4964	1.41916	1.33629	reef condition	0	-0.0403323	-0.0256176	-0.047564	0.416038	0.496397	0.419165	0.336292	1.0317	0.209277	calcifiers: non-calcifiers	0.211269	0.166395	0.182	0.159052	0.819985	0.893804	0.823352	0.721105	1	0.211269	0.166395	0.182	0.159052	0.819985	0.893804	0.823352
biomass herb. other	987.62	990.328	1220.37	1188.86	1122.31	962.591	1133.77	1344.27	biomass herb. other	1	1.00274	1.23567	1.20376	1.13638	0.974658	1.14799	1.36112	biomass herb. other	0	0.00274199	0.235669	0.203761	0.136377	-0.0253421	0.147986	0.361121	1118.76	133.316	biomass herb. other	0.162628	0.167673	0.777013	0.700475	0.510601	0.120709	0.544818	0.95463	2	0.138799	0.134114	0.710709	0.656446	0.611307	0.159608	0.632266
biomass parrotfish	843.757	838.076	958.339	952.165	972.127	869.547	973.784	1042.84	biomass parrotfish	1	0.993267	1.1358	1.12848	1.15214	1.03057	1.1541	1.23595	biomass parrotfish	0	-0.00673303	0.135799	0.128483	0.152141	0.0305659	0.154105	0.235953	931.33	72.9463	biomass parrotfish	0.114971	0.100556	0.644404	0.612417	0.712013	0.198508	0.719713	0.936833	3	0.126238	0.135546	0.432648	0.41192	0.686694	0.272629	0.920476				102.08
total reef-fish biomass	3412.07	3445.42	4154.18	4113.85	4653.73	3822.8	5355.54	5309.07	total reef-fish biomass	1	1.00977	1.2175	1.20568	1.3639	1.12038	1.56959	1.55597	total reef-fish biomass	0	0.00977372	0.217495	0.205676	0.363904	0.120376	0.569587	0.555969	4283.33	761.358	total reef-fish biomass	0.126238	0.135546	0.432648	0.41192	0.686694	0.272629	0.920476	0.911051	4	0.432044	0.475338	0.474118	0.457594	0.364041	0.524382	0.464582
# not overfished groups	16	16	19	19	18	16	19	20	# not overfished groups	1	1	1.1875	1.1875	1.125	1	1.1875	1.25	# not overfished groups	0	0	0.1875	0.1875	0.125	0	0.1875	0.25	17.875	1.64208	# not overfished groups	0.126759	0.126759	0.753362	0.753362	0.530339	0.126759	0.753362	0.902183		0.227088	0.227848	0.449869	0.421253	0.620507	0.462606	0.710169
landings targeted fish groups	127.849	132.868	102.432	100.275	102.608	141.168	101.218	128	landings targeted fish groups	1	1.03926	0.801198	0.784325	0.802576	1.10418	0.791704	1.00118	landings targeted fish groups	0	0.0392582	-0.198802	-0.215675	-0.197424	0.104182	-0.208296	0.00118316	117.052	16.9987	landings targeted fish groups	0.737329	0.823917	0.194874	0.161827	0.197742	0.922005	0.175803	0.740222
																													conservation	0.153776	0.142542	0.509016	0.470966	0.682323	0.371412	0.75209	0.880905
																													extraction	0.432044	0.475338	0.474118	0.457594	0.364041	0.524382	0.464582	0.821202
																													4 equal weight	0.227088	0.227848	0.449869	0.421253	0.620507	0.462606	0.710169	0.849772
	3-letter code of functional groups - in red are targeted in shore-based fishery																												conservation/extraction	0.29291	0.30894	0.491567	0.46428	0.523182	0.447897	0.608336	0.851053
	FPL	FCO	FIV	TIV	HHW	FDE	FHB	THB	FHG	THG	FHS	FHE	BHP	FPB	TPB	FPM	FPR	RAY	SHR	REP	CRS	CRN	BFF	BC	BM	BD	CEP	BG	BSS	ZD	ZH	ZC	TRF	MA	CCA	PS	PL	PB	BB	DL	DR	DC	DIN	RelFPL	RelFCO	RelFIV	RelTIV	RelHHW	RelFDE
Trphic Level	3.18	3.09	3.36	3.46	4	2	2	2.21	2.84	2.01	2	2	2.7	4.12	4.09	4.1	4.5	3.3	4.1	2.17
status quo	FPL	FCO	FIV	TIV	HHW	FDE	FHB	THB	FHG	THG	FHS	FHE	BHP	FPB	TPB	FPM	FPR	RAY	SHR	REP	CRS	CRN	BFF	BC	BM	BD	CEP	BG	BSS	ZD	ZH	ZC	TRF	MA	CCA	PS	PL	PB	BB	DL	DR	DC	DIN	RelFPL	RelFCO	RelFIV	RelTIV	RelHHW	RelFDE
18615	468.308	37.5842	407.775	294.739	2.16493	74.7316	14.7274	22.0187	578.702	296.501	744.928	98.7407	0.000347	27.0195	197.522	15.6693	113.43	23.1483	10.8565	283.787	5815.06	9829.07	21058.1	2205.73	2090.1	1831.3	3680.32	20.2558	10.7945	5261.47	1.3e-05	16066.8	8796.73	16423.4	5775.75	1035.38	24.9405	15.4215	0.789335	184.359	147.063	0	379381	2.85896	4.0836	2.79888	1.84958	0.675819	0.739593
18980	477.704	37.4693	404.398	293.151	2.1391	74.8498	14.7379	22.0346	579.577	296.485	746.435	98.939	0.000343	27.1314	196.715	15.4077	113.59	23.1883	10.8515	290.423	5886.45	9849.78	21032.3	2205.81	2066.21	1624.47	3619.98	20.2793	10.736	7525.24	1.6e-05	13122.1	8718.56	16477.8	5813.58	1363.12	24.8923	32.7195	1.42538	375.83	174.526	0	369872	2.91632	4.07112	2.77571	1.83961	0.667755	0.740763
19345	456.303	37.0875	402.198	292.297	2.11368	74.834	14.7317	22.0471	580.43	296.217	745.515	99.1077	0.000338	27.2187	196.353	15.1229	113.46	23.2382	10.8196	295.695	5964.96	9881.58	21136	2154.61	2055.72	1476.07	3512.62	20.2782	10.6871	8630.71	1.7e-05	7402.54	8638.19	16481.5	5852.28	1413.52	25.0879	16.0235	0.976859	184.713	151.191	0	370272	2.78567	4.02964	2.76061	1.83425	0.659821	0.740606
19710	438.756	36.7391	400.386	291.677	2.08665	74.7405	14.7241	22.0583	580.945	295.926	744.504	99.2685	0.000334	27.0583	195.995	14.8777	113.257	23.3012	10.7715	300.422	6046.83	9917.82	21392.5	2087.19	2116.61	1684.53	3403.97	20.2565	10.6489	7737.55	1.7e-05	12959.6	8565.34	16470.5	5895.19	1008.36	23.3257	16.7528	0.999336	194.75	158.309	0	366947	2.67855	3.99179	2.74817	1.83036	0.651381	0.739681
20074.5	459.707	36.3238	398.675	291.258	2.06131	74.6001	14.7017	22.0507	580.339	295.387	741.912	99.4342	0.00033	26.9092	195.601	14.8582	112.934	23.3316	10.7187	304.691	6129.91	9948.69	21310.2	2000.48	2082.5	1787.45	3385.52	20.3111	10.5934	8195.7	1.6e-05	9657.93	8496.68	16600.5	5953.41	1845.11	23.0117	20.4834	1.05364	239.968	148.417	0	367044	2.80645	3.94665	2.73643	1.82773	0.643472	0.738291
mean	460.156	37.0408	402.686	292.624	2.11313	74.7512	14.7245	22.0419	579.999	296.103	744.659	99.098	0.0003384	27.0674	196.437	15.1872	113.334	23.2415	10.8036	295.003	5968.64	9885.39	21185.8	2130.76	2082.23	1680.77	3520.48	20.2762	10.692	7470.13	1.58e-05	11841.8	8643.1	16490.8	5858.04	1333.1	24.2516	20.2802	1.04891	235.924	155.901	0	370703	2.80919	4.02456	2.76396	1.83631	0.65965	0.739787
%totfish	0.134861	0.0108558	0.118018	0.0857616	0.000619311	0.0219079	0.00431543	0.00645997	0.169984	0.0867812	0.218243	0.0290434	9.91774e-08	0.00793284	0.0575713	0.00445101	0.0332157	0.00681157	0.00316628
catches
18615	10.9269	0.003737	12.3607	49.3518	0.382715	0.073512	1.48538	14.1731	1.89178	17.4461	12.0356	13.5888	1e-06	2.38022	7.33333	2.54682	9.04441	0.06284	2.32103	0	0	0	1.2831	0.54156	0	0.151349	11.9622	0.033825	0	108.923	0	0	0	0	0	0	0	0	0	0	0	0	0	0	0	0	0	0	0
18980	11.4249	0.003735	12.248	49.1025	0.378307	0.073745	1.48708	14.1855	1.895	17.4493	12.0727	13.6166	1e-06	2.39534	7.30683	2.5104	9.06777	0.062947	2.3217	0	0	0	1.27025	0.540463	0	0.143475	11.8859	0.03394	0	109.723	0	0	0	0	0	0	0	0	0	0	0	0	0	0	0	0	0	0	0
19345	11.3895	0.003706	12.1629	48.8984	0.373859	0.073809	1.48697	14.1942	1.89797	17.4407	12.0699	13.6407	1e-06	2.40405	7.28259	2.46594	9.06136	0.063038	2.31729	0	0	0	1.26778	0.530265	0	0.144723	11.604	0.033989	0	110.052	0	0	0	0	0	0	0	0	0	0	0	0	0	0	0	0	0	0	0
19710	10.7379	0.003676	12.1019	48.7821	0.369331	0.073759	1.48674	14.205	1.90075	17.4292	12.0632	13.6645	1e-06	2.40364	7.26935	2.41743	9.05491	0.063202	2.3096	0	0	0	1.27461	0.518149	0	0.143149	11.224	0.033984	0	109.997	0	0	0	0	0	0	0	0	0	0	0	0	0	0	0	0	0	0	0
20074.5	11.0136	0.003636	12.0499	48.7071	0.364814	0.073673	1.48526	14.2092	1.89927	17.4077	12.0251	13.6807	1e-06	2.38844	7.25755	2.40233	9.03029	0.063342	2.29845	0	0	0	1.27348	0.501235	0	0.140594	11.0522	0.034048	0	110.807	0	0	0	0	0	0	0	0	0	0	0	0	0	0	0	0	0	0	0
mean	11.0986	0.003698	12.1847	48.9684	0.373805	0.0736996	1.48628	14.1934	1.89696	17.4346	12.0533	13.6383	1e-06	2.39434	7.28993	2.46859	9.05175	0.0630738	2.31361	0	0	0	1.27384	0.526334	0	0.144658	11.5457	0.0339572	0	109.9	0	0	0	0	0	0	0	0	0	0	0	0	0	0	0	0	0	0	0
%totfishCatches	0.0706975	2.35561e-05	0.0776159	0.311926	0.00238112	0.000469463	0.00946756	0.0904113	0.0120835	0.111058	0.076779	0.0868752	6.36995e-09	0.0152518	0.0464365	0.0157248	0.0576592	0.000401777	0.0147376
Size-based
18615	468.483	37.7009	422.631	305.887	1.43657	74.9793	14.665	20.7511	581.03	299.29	743.893	97.7896	0	28.7271	199.02	19.3188	104.551	23.1707	7.84199	278.493	5782.26	9782.77	21014.4	2285.73	2126.66	1532.3	3644.05	20.9219	10.7315	6679.06	1.4e-05	15082.5	8719.64	17410.5	5744.47	1127.82	25.2364	16.6916	0.792038	199.304	156.341	0	383905	2.86002	4.09629	2.90086	1.91953	0.448451	0.742044
18980	480.615	37.5849	419.418	304.205	1.41327	74.9907	14.6549	20.7337	581.844	298.98	743.903	97.9795	0	28.8464	198.445	19.0213	104.706	23.2133	7.82566	284.924	5851.82	9801.55	20960.4	2259.54	2101.49	1383.04	3588.72	20.9592	10.6713	8565.84	1.7e-05	12669.4	8639.3	17499.5	5795.53	1513.82	25.1268	34.697	2.44521	408.184	187.641	0	375464	2.93409	4.08368	2.8788	1.90898	0.441176	0.742157
19345	464.967	37.2054	417.226	303.236	1.39001	74.9151	14.6188	20.7	582.528	298.307	741.054	98.1514	0	28.8678	198.082	18.6792	104.584	23.266	7.78995	290.064	5928.36	9831.81	21087.3	2211.81	2099.11	1252.64	3485.11	20.9591	10.6216	10531.8	1.8e-05	7556.93	8558.27	17511.6	5839.97	1340.25	25.2181	17.3059	1.09559	197.503	165.754	0	376102	2.83856	4.04245	2.86376	1.9029	0.433916	0.741409
19710	475.103	36.8859	415.266	302.639	1.36688	74.7765	14.574	20.6542	582.86	297.501	737.771	98.3212	0	28.7092	197.759	18.416	104.387	23.3311	7.74406	295.124	6009.8	9865.58	21346	2160.21	2116.5	1720.65	3418.67	20.9253	10.5803	10577.5	1.5e-05	16297.3	8487.22	17513.1	5881.16	890.803	23.0267	23.1962	0.984761	266.007	144.106	0	371509	2.90044	4.00773	2.85031	1.89915	0.426693	0.740038
20074.5	490.974	36.5015	413.724	302.299	1.3449	74.5737	14.5201	20.6107	582.109	296.473	733.051	98.4674	0	28.6348	197.225	18.1732	104.16	23.3673	7.70126	299.453	6089.45	9894.84	21533.6	2136.46	2079.98	1542.08	3419.08	20.9181	10.5379	12399.8	1.7e-05	7421.28	8411.67	17539.3	5913.24	1591.16	23.596	29.0719	1.27483	334.033	160.679	0	369852	2.99733	3.96597	2.83972	1.89702	0.419832	0.73803
	476.029	37.1757	417.653	303.653	1.39033	74.8471	14.6066	20.6899	582.074	298.11	739.934	98.1418	0	28.7571	198.106	18.7217	104.477	23.2697	7.78058	289.611	5932.34	9835.31	21188.3	2210.75	2104.75	1486.14	3511.13	20.9367	10.6285	9750.82	1.62e-05	11805.5	8563.22	17494.8	5834.88	1292.77	24.4408	24.1925	1.31849	281.006	162.904	0	375366	2.90609	4.03922	2.86669	1.90552	0.434014	0.740736
%totfish	0.138163	0.0107899	0.12122	0.0881325	0.000403529	0.0217237	0.00423942	0.00600506	0.168942	0.0865236	0.214759	0.0284847	0	0.00834647	0.0574985	0.00543379	0.0303236	0.00675381	0.00225824
18615	7.86477	0.00261	12.147	52.9433	0.283832	0.063262	1.55239	14.2013	1.80545	17.802	11.8742	14.0566	0	2.63276	7.90925	3.2381	9.32702	0.070296	1.87477	0	0	0	0.317348	0.12116	0	0.12223	2.73449	0.007847	0	26.0387	0	0	0	0	0	0	0	0	0	0	0	0	0	0	0	0	0	0	0
18980	8.35192	0.002605	12.0359	52.6246	0.279279	0.063331	1.55219	14.1946	1.80758	17.7857	11.8893	14.0845	0	2.64978	7.88588	3.19257	9.3523	0.070421	1.87231	0	0	0	0.315534	0.120306	0	0.109037	2.72281	0.007868	0	26.2361	0	0	0	0	0	0	0	0	0	0	0	0	0	0	0	0	0	0	0
19345	8.37368	0.002582	11.9535	52.3853	0.274743	0.063306	1.54922	14.1756	1.81009	17.7521	11.8569	14.1103	0	2.6576	7.86715	3.13845	9.34507	0.07053	1.86574	0	0	0	0.315729	0.117675	0	0.09924	2.66114	0.007877	0	26.3209	0	0	0	0	0	0	0	0	0	0	0	0	0	0	0	0	0	0	0
19710	8.04667	0.002559	11.887	52.222	0.270106	0.063207	1.54524	14.1484	1.81198	17.7081	11.8131	14.136	0	2.65093	7.8522	3.07799	9.33766	0.070717	1.85631	0	0	0	0.318662	0.114621	0	0.104038	2.58297	0.007866	0	26.2811	0	0	0	0	0	0	0	0	0	0	0	0	0	0	0	0	0	0	0
20074.5	8.64344	0.002531	11.8334	52.1534	0.265738	0.063052	1.53941	14.1155	1.81086	17.6493	11.7393	14.159	0	2.63935	7.83697	3.04509	9.31218	0.070873	1.84528	0	0	0	0.322204	0.113398	0	0.12271	2.57462	0.007864	0	26.3702	0	0	0	0	0	0	0	0	0	0	0	0	0	0	0	0	0	0	0
	8.2561	0.0025774	11.9713	52.4657	0.27474	0.0632316	1.54769	14.1671	1.80919	17.7394	11.8346	14.1093	0	2.64608	7.87029	3.13844	9.33485	0.0705674	1.86288	0	0	0	0.317895	0.117432	0	0.111451	2.65521	0.0078644	0	26.2494	0	0	0	0	0	0	0	0	0	0	0	0	0	0	0	0	0	0	0
%totfishCatches	0.0518716	1.61934e-05	0.0752139	0.329633	0.00172614	0.000397273	0.00972387	0.0890094	0.0113668	0.111454	0.0743545	0.0886462	0	0.0166249	0.0494477	0.0197183	0.0586492	0.000443363	0.0117042
Catch Limit
18615	477.876	37.2897	450.846	535.638	16.8733	74.7397	18.6652	122.558	589.263	414.409	773.494	184.018	0.152104	30.121	205.493	13.2184	88.5773	22.9418	69.9722	194.122	5824.45	9863.64	20805.3	2291.09	2182.81	976.177	3306.06	20.9286	10.7682	9246.64	1.6e-05	10219.3	8762.44	17270.2	5872.85	1339.97	26.3506	18.1998	0.933409	216.416	153.595	0	399144	2.91737	4.0516	3.09452	3.36129	5.26727	0.739674
18980	483.822	37.1559	447.164	534.458	17.0395	74.6768	18.6835	122.864	590.143	414.507	775.532	184.398	0.144437	30.4351	205.782	13.0809	88.4809	23.0062	70.353	198.099	5893.52	9881.49	20839.2	2285.9	2165.97	892.924	3293.79	20.9291	10.7087	10983.2	1.7e-05	7816.46	8691.14	17306.1	5920.23	1304.47	26.2192	15.1527	0.932359	176.595	155.357	0	395207	2.95367	4.03707	3.06924	3.35389	5.31917	0.739051
19345	501.622	36.7808	443.022	532.96	17.1826	74.5117	18.6601	122.963	590.916	414.232	774.924	184.673	0.137067	30.7461	205.89	12.9859	88.1442	23.0766	70.5917	201.661	5972.54	9910.61	20945.8	2234.19	2200.98	1190.19	3274.91	20.8811	10.6558	11215.2	1.8e-05	15083.2	8627.52	17299.9	5946.96	1462.68	24.4561	34.6907	1.54912	398.053	168.43	0	398262	3.06233	3.99631	3.04082	3.34449	5.36384	0.737417
19710	551.334	36.4442	438.908	531.786	17.3342	74.2994	18.6292	122.948	591.395	413.829	773.786	184.923	0.129932	31.0242	205.953	13.0389	87.8325	23.1538	70.835	205.742	6052	9938.87	21070.2	2241.8	2154.85	1145.22	3321.16	20.9047	10.6037	13284.9	1.4e-05	9244.61	8552.47	17391.6	5982.57	849.823	24.5803	11.0011	0.676634	126.276	147.52	0	388797	3.36582	3.95974	3.01258	3.33712	5.41115	0.735315
20074.5	556.872	36.0191	434.725	530.029	17.443	74.0035	18.5702	122.726	590.549	413.115	770.843	185.103	0.122986	31.0749	205.65	12.8978	87.4552	23.1933	71.0228	208.513	6134.22	9972.69	21295.3	2200.73	2156.91	1157.03	3297.95	20.8205	10.5604	14587.6	4.2e-05	10205.1	8470.44	17308.8	5989.01	1999.1	23.9268	37.5316	4.51996	456.882	247.82	0	389496	3.39963	3.91355	2.98387	3.32609	5.44511	0.732387
	514.305	36.7379	442.933	532.974	17.1745	74.4462	18.6417	122.812	590.453	414.018	773.716	184.623	0.137305	30.6803	205.754	13.0444	88.098	23.0744	70.5549	201.627	5975.35	9913.46	20991.2	2250.74	2172.31	1072.31	3298.77	20.8928	10.6593	11863.5	2.14e-05	10513.7	8620.8	17315.3	5942.32	1391.21	25.1066	23.3152	1.7223	274.845	174.544	0	394181	3.13976	3.99166	3.04021	3.34458	5.36131	0.736769
%totfish	0.123804	0.00884361	0.106624	0.128298	0.00413427	0.0179208	0.00448745	0.0295634	0.142135	0.0996631	0.18625	0.0444427	3.30523e-05	0.0073854	0.0495293	0.00314006	0.0212071	0.0055545	0.0169841
18615	2.73371	0.001337	5.27951	31.3757	0.808973	0.036936	0.793742	25.6641	0.78754	9.73027	6.24306	8.731	0.024563	1.7697	6.31782	2.24894	7.31614	0.046849	3.83682	0	0	0	1.15136	0.355724	0	0.179129	6.67918	0.013122	0	54.5733	0	0	0	0	0	0	0	0	0	0	0	0	0	0	0	0	0	0	0
18980	2.72786	0.00134	5.28944	31.3955	0.81136	0.037163	0.797854	25.6859	0.79186	9.77463	6.28355	8.73446	0.023485	1.77964	6.33127	2.22953	7.31778	0.047019	3.84127	0	0	0	1.15386	0.357077	0	0.179829	6.72444	0.013176	0	54.992	0	0	0	0	0	0	0	0	0	0	0	0	0	0	0	0	0	0	0
19345	2.72359	0.001338	5.28069	31.4016	0.814604	0.037217	0.797673	25.6973	0.792228	9.7701	6.2883	8.74606	0.022376	1.78699	6.32969	2.20342	7.31407	0.047094	3.84411	0	0	0	1.15343	0.357494	0	0.17918	6.73113	0.013161	0	54.9576	0	0	0	0	0	0	0	0	0	0	0	0	0	0	0	0	0	0	0
19710	2.79931	0.001337	5.27421	31.3812	0.816983	0.037144	0.797339	25.7211	0.79219	9.77923	6.28304	8.76037	0.021264	1.78449	6.32871	2.20797	7.31178	0.04708	3.85117	0	0	0	1.15925	0.355956	0	0.181399	6.71372	0.01316	0	54.9921	0	0	0	0	0	0	0	0	0	0	0	0	0	0	0	0	0	0	0
20074.5	2.82235	0.001331	5.24244	31.2941	0.818787	0.036911	0.792746	25.6922	0.788669	9.7263	6.24617	8.74954	0.020256	1.78029	6.31788	2.19938	7.29995	0.046887	3.85267	0	0	0	1.15494	0.354286	0	0.184102	6.68258	0.013193	0	54.667	0	0	0	0	0	0	0	0	0	0	0	0	0	0	0	0	0	0	0
	2.76828	0.0013365	5.2717	31.3681	0.815434	0.0371088	0.796403	25.6991	0.791237	9.76257	6.27526	8.74761	0.0218453	1.78285	6.32689	2.21008	7.31089	0.04702	3.8473	0	0	0	1.15537	0.356203	0	0.181127	6.71297	0.0131725	0	54.9022	0	0	0	0	0	0	0	0	0	0	0	0	0	0	0	0	0	0	0
%totfishCatches	0.0243085	1.17359e-05	0.0462913	0.275446	0.0071604	0.000325855	0.00699329	0.225666	0.00694792	0.085726	0.0551037	0.0768135	0.000191825	0.0156554	0.055557	0.0194069	0.0641976	0.000412887	0.0337835
Catch & size limit
18615	494.757	37.06	449.354	550.983	13.1063	74.4263	18.465	93.9151	591.749	409.39	774.439	176.985	0.029638	30.9472	196.407	12.2251	89.6401	22.9167	67.9481	199.903	5792.26	9808.53	20881.9	2208.52	2165.82	1193.73	3385.97	21.2024	10.7465	7832.5	1.6e-05	10755.9	8756.19	17710	5843.76	1938.06	26.3687	24.26	1.09522	293.832	161.775	0	395367	3.02042	4.02664	3.08428	3.45759	4.09136	0.736572
18980	492.81	36.9254	445.205	549.034	13.1772	74.3731	18.4774	94.0838	592.677	409.537	776.42	177.32	0.026234	31.3448	196.447	12.0408	89.5116	22.9732	68.2585	203.952	5860.76	9826.56	20982.2	2223.57	2159.18	1080.03	3352.71	21.2262	10.6895	9756.76	1.6e-05	8909.29	8685.73	17774.5	5894.91	1261.18	26.0942	15.3616	1.00387	180.326	159.487	0	390741	3.00854	4.01203	3.0558	3.44536	4.1135	0.736045
19345	486.418	36.5444	440.796	546.941	13.2243	74.2267	18.4512	94.1641	593.486	409.309	775.723	177.58	0.023139	31.5724	196.296	11.8057	89.1515	23.0396	68.4213	207.393	5936.55	9852.19	21187.7	2216.86	2167.31	1139.68	3300.1	21.2016	10.6398	11404.3	3.4e-05	11156.5	8613.59	17747.8	5927.35	1558.57	25.1592	27.9194	2.8204	334.035	213.887	0	390997	2.96951	3.97063	3.02554	3.43222	4.12818	0.734596
19710	544.469	36.2431	436.6	545.972	13.2966	74.0303	18.429	94.1617	594.033	408.99	774.671	177.822	0.020238	31.7388	196.584	11.9211	88.8074	23.1153	68.5831	211.572	6016.19	9881.41	21313.6	2214.61	2163.13	1356.95	3349.37	21.2279	10.5898	12011.3	1.4e-05	12299.1	8550.81	17875.1	5974.78	718.674	24.1487	11.8455	1.21514	140.205	153.649	0	382663	3.32391	3.93789	2.99674	3.42614	4.15077	0.732653
20074.5	552.513	35.8337	432.864	544.492	13.3449	73.7563	18.382	94.1033	593.294	408.378	771.869	177.995	0.017589	31.7724	196.414	11.8079	88.4539	23.1558	68.7394	214.559	6095.41	9911	21458.7	2193.08	2130.24	1214.39	3347.08	21.1718	10.5447	13995.1	1.9e-05	6305.63	8468.85	17823.3	5988.61	1531.29	24.4743	19.0361	0.987233	220.444	163.379	0	380757	3.37302	3.8934	2.97109	3.41686	4.16583	0.72994
	514.193	36.5213	440.964	547.484	13.2299	74.1625	18.4409	94.0856	593.048	409.121	774.625	177.54	0.0233676	31.4751	196.43	11.9601	89.1129	23.0401	68.3901	207.476	5940.23	9855.94	21164.8	2211.33	2157.14	1196.96	3347.05	21.206	10.6421	11000	1.98e-05	9885.28	8615.04	17786.1	5925.88	1401.55	25.249	19.6845	1.42437	233.768	170.435	0	388105	3.13908	3.96812	3.02669	3.43563	4.12993	0.733961
%totfish	0.124991	0.00887765	0.10719	0.133083	0.00321594	0.0180275	0.00448265	0.0228705	0.144159	0.0994497	0.188297	0.0431568	5.68023e-06	0.00765102	0.0477484	0.00290729	0.0216617	0.00560063	0.0166244
18615	2.51286	0.00123	5.12656	31.2203	0.763088	0.03587	0.787847	24.189	0.762453	9.65521	6.13723	8.65688	0.006254	1.77234	6.30565	1.98957	7.34058	0.04682	3.83019	0	0	0	0.314023	0.116788	0	0.094512	2.54597	0.00796	0	26.5385	0	0	0	0	0	0	0	0	0	0	0	0	0	0	0	0	0	0	0
18980	2.49668	0.001236	5.14759	31.2756	0.764199	0.036049	0.792311	24.2883	0.767738	9.70357	6.17605	8.67391	0.005593	1.78262	6.31274	1.96282	7.34312	0.047015	3.83304	0	0	0	0.314537	0.117316	0	0.085444	2.53424	0.00797	0	26.6664	0	0	0	0	0	0	0	0	0	0	0	0	0	0	0	0	0	0	0
19345	2.48227	0.001237	5.13746	31.2319	0.764804	0.036189	0.792263	24.2786	0.767782	9.70775	6.18716	8.67976	0.005023	1.7919	6.315	1.92604	7.33685	0.047097	3.83522	0	0	0	0.316289	0.116826	0	0.078193	2.49974	0.007973	0	26.7024	0	0	0	0	0	0	0	0	0	0	0	0	0	0	0	0	0	0	0
19710	2.52698	0.001233	5.13723	31.2399	0.766732	0.036049	0.792198	24.3198	0.768165	9.70709	6.17134	8.68943	0.004561	1.78593	6.31334	1.91548	7.33264	0.047094	3.83818	0	0	0	0.319356	0.11602	0	0.102871	2.49665	0.007968	0	26.7729	0	0	0	0	0	0	0	0	0	0	0	0	0	0	0	0	0	0	0
20074.5	2.58185	0.001225	5.0978	31.1559	0.767177	0.035839	0.787193	24.2173	0.762831	9.65807	6.13999	8.68017	0.004073	1.78224	6.30343	1.91824	7.32108	0.046892	3.84075	0	0	0	0.32128	0.116054	0	0.096651	2.52015	0.007968	0	26.8376	0	0	0	0	0	0	0	0	0	0	0	0	0	0	0	0	0	0	0
	2.52195	0.00123275	5.13002	31.2258	0.765728	0.0360315	0.790991	24.276	0.766629	9.69412	6.16863	8.68082	0.0048125	1.78568	6.31113	1.93065	7.33342	0.0470245	3.8368	0	0	0	0.317866	0.116554	0	0.0907898	2.5127	0.00796975	0	26.7448	0	0	0	0	0	0	0	0	0	0	0	0	0	0	0	0	0	0	0
%totfishCatches	0.0226575	1.10752e-05	0.0460887	0.280537	0.00687939	0.000323711	0.00710636	0.218099	0.00688749	0.0870931	0.0554198	0.0779895	4.32361e-05	0.0160427	0.0566999	0.0173452	0.0658843	0.000422474	0.0344703
Size&Catch&NoLBSP
18615	788.256	37.229	490.077	641.662	18.8186	73.6568	16.2556	76.5025	569.137	387.806	787.49	182.193	0.0313	43.2475	212.205	37.3027	150.254	23.4261	83.9556	168.115	7686.27	14186.1	21302.4	1453.68	1785.94	1292.35	2232.03	18.6949	11.222	22156.6	673.115	0.78455	8277.64	14347.1	5190.58	1685.44	13.668	13.2813	1.05882	156.151	152.54	0	109008	4.8122	4.04501	3.36379	4.02663	5.87454	0.728956
18980	804.989	37.2587	491.947	642.396	18.9627	73.0997	16.283	76.0983	570.129	387.91	790.52	182.549	0.027655	43.2126	213.573	37.1466	150.117	23.5213	84.1097	170.795	7795.94	14227.5	21344.1	1477.03	1778.63	1300.56	2246.9	18.615	11.1757	22192.4	604.629	0.762264	8215.19	14271.1	5201	1646.94	13.7341	12.4462	0.896522	145.349	147.722	0	108721	4.91435	4.04823	3.37663	4.03123	5.91951	0.723443
19345	820.327	37.0237	493.681	643.065	19.1	72.5041	16.2751	75.5794	571.008	387.717	790.596	182.857	0.024397	43.1569	214.587	36.9517	149.651	23.6242	84.198	173.344	7919.37	14291.1	21397.3	1543.58	1767.8	1300.9	2260.23	18.5646	11.1322	24433.2	750.271	0.873863	8174.04	14244.6	5221.49	1509.71	13.4133	12.0786	1.07028	142.846	155.13	0	106055	5.00798	4.02271	3.38853	4.03543	5.96239	0.717548
19710	829.52	36.8024	495.389	643.895	19.2294	71.8707	16.2522	75.0084	571.481	387.362	789.966	183.175	0.02148	43.0785	215.641	36.6881	149.177	23.7303	84.2866	175.944	8027.91	14316.2	21410	1572.65	1756.66	1284.58	2268.14	18.4883	11.0922	25527.6	1582.39	1.22699	8126.29	14159.4	5232.81	1649.1	13.2744	19.3009	1.93239	231.063	203.525	0	104853	5.06411	3.99865	3.40025	4.04064	6.00276	0.71128
20074.5	829.171	36.5264	497.119	644.739	19.3676	71.1878	16.2201	74.4871	570.816	386.893	787.818	183.472	0.018738	42.9046	216.688	36.4097	148.821	23.8026	84.3535	177.964	8156.74	14382.5	21470.2	1619.91	1746.99	1282.89	2273.67	18.46	11.0543	27223.2	1306.66	1.13478	8097.52	14167.1	5266.91	986.128	13.0037	9.0327	0.742252	102.613	180.793	0	103866	5.06197	3.96867	3.41213	4.04593	6.04592	0.704521
	814.453	36.968	493.643	643.151	19.0956	72.4638	16.2572	75.5351	570.514	387.538	789.278	182.849	0.024714	43.12	214.539	36.8997	149.604	23.6209	84.1806	173.233	7917.25	14280.7	21384.8	1533.37	1767.21	1292.26	2256.19	18.5646	11.1353	24306.6	983.413	0.95649	8178.14	14237.9	5222.56	1495.46	13.4187	13.2279	1.14005	155.604	167.942	0	106500	4.97212	4.01665	3.38827	4.03597	5.96102	0.71715
%totfish	0.175011	0.00794373	0.106075	0.138201	0.0041033	0.0155711	0.00349337	0.0162311	0.122593	0.0832746	0.169601	0.0392908	5.31057e-06	0.00926568	0.0461003	0.00792906	0.0321471	0.00507569	0.0180888
18615	2.88587	0.00123	5.22419	32.4974	0.844381	0.035869	0.767825	23.2726	0.7559	9.5541	6.15419	8.71558	0.006514	1.86215	6.35313	3.08299	7.78473	0.046962	4.10462	0	0	0	0.319608	0.075379	0	0.09699	1.67317	0.007027	0	21.5646	0	0	0	0	0	0	0	0	0	0	0	0	0	0	0	0	0	0	0
18980	2.88299	0.001238	5.24838	32.4898	0.846371	0.035977	0.773187	23.3978	0.761257	9.60754	6.19508	8.72862	0.00593	1.87172	6.37285	3.09797	7.82172	0.047162	4.10555	0	0	0	0.320571	0.077289	0	0.097754	1.68258	0.007009	0	21.5088	0	0	0	0	0	0	0	0	0	0	0	0	0	0	0	0	0	0	0
19345	2.90396	0.001241	5.25123	32.5138	0.849443	0.0361	0.773874	23.3754	0.761691	9.60678	6.21189	8.73694	0.005269	1.87432	6.37413	3.10282	7.84958	0.047255	4.10593	0	0	0	0.321199	0.08001	0	0.097735	1.69357	0.006982	0	21.428	0	0	0	0	0	0	0	0	0	0	0	0	0	0	0	0	0	0	0
19710	2.90552	0.001238	5.26021	32.5287	0.850769	0.035908	0.773004	23.3387	0.761605	9.61569	6.19615	8.75106	0.004664	1.87335	6.3812	3.09375	7.81932	0.047245	4.10691	0	0	0	0.321596	0.081799	0	0.097308	1.70171	0.006961	0	21.3446	0	0	0	0	0	0	0	0	0	0	0	0	0	0	0	0	0	0	0
20074.5	2.91723	0.00123	5.24715	32.5334	0.852649	0.035672	0.767483	23.1769	0.756822	9.55827	6.15757	8.73946	0.004262	1.86157	6.36473	3.07343	7.77545	0.047067	4.10575	0	0	0	0.32233	0.083333	0	0.096645	1.70688	0.006941	0	21.2927	0	0	0	0	0	0	0	0	0	0	0	0	0	0	0	0	0	0	0
	2.31698	0.001244	5.19951	32.5558	0.818605	0.036164	0.765286	23.4429	0.757598	9.56875	6.12477	8.67695	0.016441	1.85675	6.33028	3.1008	7.83387	0.046815	4.09224	0	0	0	0.312892	0.066075	0	0.096763	1.64308	0.0074	0	23.0032	0	0	0	0	0	0	0	0	0	0	0	0	0	0	0	0	0	0	0
%totfishCatches	0.0204064	1.09563e-05	0.0457938	0.28673	0.00720972	0.000318508	0.00674012	0.20647	0.00667241	0.0842751	0.0539428	0.0764207	0.000144801	0.016353	0.0557528	0.0273098	0.0689955	0.000412315	0.0360417
Status Quo & No LBSP
18615	646.483	37.4903	463.629	334.861	2.66439	76.02	13.9362	21.4245	565.164	286.15	765.175	102.49	0.000361	34.0057	212.702	38.9019	136.568	23.8044	12.0295	224.544	7738.24	14267	22240.4	1430.24	1767.88	1641.06	2350.54	17.9202	11.3071	20313.4	834.375	0.800958	8362.17	13197.9	5192.15	1732.72	15.9828	14.8035	1.00209	173.946	150.036	0	105516	3.94669	4.0734	3.18226	2.10136	0.831735	0.752344
18980	675.146	37.5171	466.292	335.772	2.65559	75.5048	13.9547	21.4139	566.158	286.139	767.91	102.663	0.000356	34.066	214.194	38.8312	137.072	23.9097	12.03	229.08	7852.36	14320.5	22333.5	1501.37	1757.63	1648.17	2368.92	17.8367	11.262	22287.9	1035.62	0.976497	8311.5	13157.9	5211.02	1156.37	15.6707	9.04781	0.73659	106.198	131.924	0	103689	4.12167	4.07631	3.20053	2.10707	0.828988	0.747245
19345	681.364	37.2782	468.443	336.247	2.6458	74.9731	13.9444	21.3911	567.052	285.861	767.974	102.82	0.000351	34.09	215.075	38.6993	137.195	24.0175	12.0169	233.3	7971.82	14365.6	22370.8	1515.79	1742.33	1641.72	2383.58	17.7563	11.2227	21890.9	509.001	0.846788	8253.89	13048.5	5219.14	2420.9	15.6371	16.0468	0.99725	192.243	157.799	0	104030	4.15963	4.05035	3.2153	2.11006	0.82593	0.741984
19710	703.068	37.07	471.403	337.223	2.6388	74.4903	13.9276	21.3441	567.571	285.481	767.338	102.98	0.000347	34.1368	216.431	38.5629	137.325	24.1357	12.003	237.65	8096.75	14418.9	22446.4	1562.83	1736.49	1634.37	2397.24	17.6646	11.185	24562.3	820.688	0.667222	8221.56	12973.9	5237.45	1120.42	15.4556	8.38391	0.643712	97.8215	131.183	0	102597	4.29213	4.02773	3.23562	2.11618	0.823744	0.737205
20074.5	716.824	36.7937	473.995	337.892	2.63251	73.9981	13.9011	21.295	566.924	284.937	765.245	103.14	0.000342	34.1408	217.369	38.3938	137.378	24.2122	11.9808	240.978	8217.27	14462	22490.5	1615.22	1719.54	1621.49	2404.25	17.6118	11.1496	26193.9	495.896	0.575301	8182.22	12917.3	5263.47	1340.87	15.2551	9.50284	0.672895	109.25	138.037	0	101887	4.37611	3.99771	3.25341	2.12037	0.821782	0.732334
	684.577	37.2298	468.752	336.399	2.64742	74.9973	13.9328	21.3737	566.574	285.714	766.729	102.819	0.0003514	34.0879	215.154	38.6778	137.107	24.0159	12.012	233.11	7975.29	14366.8	22376.3	1525.09	1744.78	1637.36	2380.91	17.7579	11.2253	23049.6	739.116	0.773353	8266.27	13059.1	5224.64	1554.26	15.6002	11.557	0.810507	135.892	141.796	0	103544	4.17925	4.0451	3.21742	2.11101	0.826436	0.742222
%totfish	0.179077	0.0097389	0.12262	0.0879981	0.000692534	0.0196184	0.00364466	0.00559112	0.148209	0.0747394	0.200567	0.0268962	9.19222e-08	0.00891699	0.0562819	0.0101177	0.0358657	0.00628228	0.00314221
18615	15.8224	0.003709	13.9457	55.8463	0.466793	0.074949	1.39758	13.7346	1.83034	16.7644	12.2703	14.0405	1e-06	2.99764	7.84398	6.27696	10.8883	0.064569	2.57416	0	0	0	1.28473	0.338514	0	0.457471	7.62033	0.030443	0	90.3446	0	0	0	0	0	0	0	0	0	0	0	0	0	0	0	0	0	0	0
18980	16.3617	0.00372	14.0111	55.9532	0.464979	0.074446	1.40037	13.7342	1.83376	16.7665	12.3286	14.0648	1e-06	3.00149	7.89287	6.26292	10.9349	0.064823	2.57417	0	0	0	1.28693	0.349162	0	0.458917	7.66802	0.0303	0	89.7705	0	0	0	0	0	0	0	0	0	0	0	0	0	0	0	0	0	0	0
19345	16.8364	0.003704	14.0867	56.0834	0.463442	0.07391	1.40048	13.7243	1.83682	16.7561	12.3441	14.0868	1e-06	3.00653	7.93749	6.24908	10.9509	0.06508	2.57216	0	0	0	1.29036	0.359947	0	0.460465	7.72629	0.030212	0	89.5334	0	0	0	0	0	0	0	0	0	0	0	0	0	0	0	0	0	0	0
19710	17.1006	0.003688	14.1573	56.1851	0.461843	0.073434	1.39934	13.7021	1.83931	16.7396	12.3454	14.1059	1e-06	3.0084	7.97452	6.22558	10.966	0.065388	2.56995	0	0	0	1.29195	0.369395	0	0.45772	7.76714	0.030063	0	88.8504	0	0	0	0	0	0	0	0	0	0	0	0	0	0	0	0	0	0	0
20074.5	17.5854	0.003661	14.2447	56.342	0.460839	0.072942	1.39699	13.6711	1.83784	16.7107	12.3157	14.1264	1e-06	3.01312	8.02206	6.20359	10.9701	0.065659	2.56586	0	0	0	1.29545	0.377627	0	0.455318	7.80662	0.02997	0	88.5415	0	0	0	0	0	0	0	0	0	0	0	0	0	0	0	0	0	0	0
	16.7413	0.0036964	14.0891	56.082	0.463579	0.0739362	1.39895	13.7133	1.83561	16.7475	12.3208	14.0849	1e-06	3.00543	7.93418	6.24362	10.942	0.0651038	2.57126	0	0	0	1.28988	0.358929	0	0.457978	7.71768	0.0301976	0	89.4081	0	0	0	0	0	0	0	0	0	0	0	0	0	0	0	0	0	0	0
%totfishCatches	0.0938854	2.07295e-05	0.0790118	0.314509	0.00259976	0.000414635	0.00784534	0.0769042	0.0102941	0.09392	0.0690953	0.0789883	5.60801e-09	0.0168545	0.044495	0.0350143	0.0613631	0.000365103	0.0144197
No Stressors
18615	801.053	37.5119	438.365	818.449	33.8759	71.6413	17.6765	220.996	557.711	476.833	799.71	241.218	11.431	49.1453	266.236	36.3871	228.065	23.269	154.666	135.241	7216.66	13727	21180.5	1385.87	1871.18	1087.74	2156.96	19.1591	11.1421	21905.1	1345.61	0.95789	8238.88	15008.8	5259.18	1267.29	13.8984	10.9421	0.882211	128.843	139.953	0	120052	4.89032	4.07575	3.00885	5.13602	10.5749	0.709009
18980	812.255	37.5234	439.341	818.45	33.9105	71.0102	17.7004	221.268	558.731	477.024	802.301	241.583	11.7503	48.6756	267.815	36.0725	228.226	23.3625	154.855	136.643	7335.05	13791.6	21246.6	1397.36	1857.97	1088.71	2168.53	19.1099	11.0924	22206.7	1337.67	0.988645	8181.54	14984.1	5281.94	1295.57	13.687	11.49	0.926535	135.791	142.182	0	118369	4.9587	4.077	3.01555	5.13603	10.5857	0.702763
19345	823.792	37.2614	440.377	818.138	33.9128	70.2825	17.6858	220.719	559.612	476.737	801.87	241.802	12.0661	48.3379	269.093	35.7438	228.017	23.4633	154.963	137.949	7460.75	13857.4	21291.1	1407.28	1844.09	1093.9	2180.99	19.0452	11.0459	22458.4	1379.13	1.08774	8116.02	14923	5295.86	1833.49	13.4911	14.4132	1.58651	173.224	172.259	0	116802	5.02914	4.04852	3.02266	5.13407	10.5864	0.695562
19710	829.53	37.0066	441.468	818.49	33.9316	69.5308	17.6772	220.272	560.221	476.587	801.753	242.017	12.3887	48.0331	269.997	35.4193	227.805	23.5899	155.078	139.426	7593.85	13945.2	21384.2	1415.52	1869.25	1099.94	2193.71	19.0267	11.007	23187.3	941.642	0.688151	8064.17	14941.1	5321.29	1687.7	13.3238	12.7377	0.95403	150.098	153.562	0	115028	5.06417	4.02085	3.03015	5.13627	10.5923	0.688122
20075	837.03	36.6644	442.605	818.682	33.9266	68.8122	17.6447	219.388	559.581	476.009	799.796	242.17	12.7026	47.6616	270.564	35.0227	227.495	23.6756	155.175	140.478	7717.98	14003	21410.1	1461.75	1850.52	1089.59	2204.08	18.9377	10.9624	24985.1	1712.13	1.37222	8017.27	14857.6	5329.17	991.185	13.0643	9.55306	0.813568	108.014	193.858	0	113211	5.10995	3.98366	3.03796	5.13748	10.5908	0.681011
	820.732	37.1935	440.431	818.442	33.9115	70.2554	17.6769	220.528	559.171	476.638	801.086	241.758	12.0677	48.3707	268.741	35.7291	227.922	23.4721	154.948	137.947	7464.86	13864.8	21302.5	1413.56	1858.6	1091.98	2180.85	19.0557	11.05	22948.5	1343.24	1.01893	8123.57	14942.9	5297.49	1415.05	13.4929	11.8272	1.03257	139.194	160.363	0	116692	5.01046	4.04115	3.02303	5.13597	10.586	0.695293
%totfish	0.15459	0.00700565	0.0829582	0.154159	0.00638746	0.0132331	0.00332957	0.041538	0.105324	0.089778	0.15089	0.0455368	0.00227304	0.00911095	0.0506192	0.00672981	0.0429306	0.00442112	0.0291854
Full Regulation: Catch&SizeLimit&MPAs&NoLBSP
18615	787.426	37.2321	489.193	651.613	19.4084	73.6198	16.2967	85.63	569.21	389.84	787.961	183.505	0.062327	43.3952	211.985	37.6112	150.551	23.4434	87.0329	166.589	7705.44	14216.5	21374.1	1390.7	1817.59	1300.31	2234.37	18.6948	11.2258	21563.1	604.619	0.758982	8261.37	14330.7	5189.65	2600.4	14.1006	16.0931	1.0745	189.163	160.497	0	109834	4.80713	4.04535	3.35772	4.08907	6.05864	0.72859
18980	803.562	37.2631	491.102	652.24	19.5583	73.0569	16.3213	85.3871	570.178	390.015	790.95	183.831	0.057008	43.3315	213.354	37.4184	150.4	23.5404	87.2015	169.205	7819.68	14276.7	21464.8	1461.38	1808.38	1307.46	2248.13	18.6611	11.1804	22713.1	790.484	0.875902	8211.32	14341.9	5216.24	1924.65	14.0958	15.1223	1.22008	180.619	163.23	0	108335	4.90564	4.04871	3.37083	4.09301	6.10546	0.723019
19345	816.607	37.0283	492.792	652.95	19.6938	72.4479	16.3111	85.0256	571.022	389.748	791.004	184.123	0.052063	43.2806	214.469	37.1849	149.945	23.6473	87.3053	171.703	7940.84	14329.2	21491	1499.94	1795.28	1305.32	2262.71	18.5759	11.1373	24249.8	938.126	1.127	8153.53	14256.7	5225.13	1531.26	13.8841	14.7709	1.18167	165.63	215.936	0	107367	4.98527	4.0232	3.38243	4.09746	6.14775	0.716992
19710	829.304	36.8069	494.617	653.826	19.8275	71.7952	16.2877	84.5906	571.45	389.372	790.272	184.422	0.047407	43.1834	215.568	36.8753	149.465	23.7569	87.4052	174.262	8051.73	14356.8	21497.8	1529.36	1779.42	1288.28	2271.49	18.4924	11.0965	25142.4	696.465	0.840112	8107.86	14170.6	5235.64	2512.33	13.8838	13.9913	1.33619	166.624	171.207	0	106908	5.06279	3.99914	3.39495	4.10296	6.18949	0.710532
20074.5	828.317	36.5378	496.604	654.838	19.9758	71.0978	16.2547	84.2132	570.766	388.932	788.139	184.713	0.043129	43.0008	216.677	36.5306	149.119	23.8334	87.4851	176.262	8188.97	14440.3	21594.1	1573.3	1771.31	1291.26	2278.52	18.4801	11.0596	25787.8	437.961	0.563616	8090.61	14205.6	5274.02	1263.38	13.2544	9.07643	0.715447	105.224	139.381	0	106896	5.05676	3.96991	3.40859	4.10931	6.23578	0.703631
	813.043	36.9736	492.862	653.094	19.6928	72.4035	16.2943	84.9693	570.525	389.581	789.665	184.119	0.0523868	43.2383	214.411	37.1241	149.896	23.6443	87.286	171.604	7941.33	14323.9	21484.4	1490.94	1794.4	1298.52	2259.04	18.5809	11.1399	23891.2	693.531	0.833122	8164.94	14261.1	5228.13	1966.41	13.8438	13.8108	1.10558	161.452	170.05	0	107868	4.96352	4.01726	3.3829	4.09836	6.14743	0.716553
%totfish	0.173769	0.00790225	0.105338	0.139583	0.00420887	0.0154746	0.00348252	0.0181602	0.121936	0.0832639	0.168772	0.0393511	1.11965e-05	0.00924117	0.0458253	0.0079344	0.0320368	0.00505341	0.0186553
18615	2.84043	0.001213	5.1207	31.8886	0.822228	0.035497	0.752934	23.2365	0.737796	9.35397	6.03708	8.5798	0.010836	1.84513	6.29744	3.04548	7.67982	0.04641	3.98889	0	0	0	0.252852	0.067754	0	0.071778	1.49195	0.006565	0	20.3302	0	0	0	0	0	0	0	0	0	0	0	0	0	0	0	0	0	0	0
18980	2.86544	0.001219	5.15072	31.92	0.822872	0.03564	0.757942	23.3628	0.741953	9.41223	6.06663	8.60996	0.010042	1.85462	6.30959	3.05979	7.71341	0.046524	3.99123	0	0	0	0.253157	0.071119	0	0.071771	1.49957	0.006544	0	20.2993	0	0	0	0	0	0	0	0	0	0	0	0	0	0	0	0	0	0	0
19345	2.85479	0.001223	5.15091	31.9363	0.825849	0.035746	0.760106	23.3507	0.744687	9.4208	6.09103	8.61453	0.009236	1.85859	6.31096	3.06778	7.74561	0.046578	3.9921	0	0	0	0.253465	0.072622	0	0.071959	1.50955	0.00653	0	20.2443	0	0	0	0	0	0	0	0	0	0	0	0	0	0	0	0	0	0	0
19710	2.86861	0.001217	5.16257	31.9727	0.827796	0.035562	0.757868	23.3227	0.742811	9.41732	6.06812	8.62788	0.008529	1.8549	6.31448	3.05384	7.70947	0.046583	3.99347	0	0	0	0.25337	0.074749	0	0.071278	1.51719	0.006504	0	20.1395	0	0	0	0	0	0	0	0	0	0	0	0	0	0	0	0	0	0	0
20074.5	2.8799	0.001211	5.13765	31.9374	0.830037	0.035356	0.753276	23.1627	0.738575	9.36133	6.0413	8.60932	0.007808	1.84408	6.31319	3.03616	7.66672	0.046486	3.99287	0	0	0	0.25391	0.076608	0	0.07076	1.52261	0.006487	0	20.1081	0	0	0	0	0	0	0	0	0	0	0	0	0	0	0	0	0	0	0
	2.86183	0.0012166	5.14451	31.931	0.825756	0.0355602	0.756425	23.2871	0.741164	9.39313	6.06083	8.6083	0.0092902	1.85146	6.30913	3.05261	7.70301	0.0465162	3.99171	0	0	0	0.253351	0.0725704	0	0.0715092	1.50817	0.006526	0	20.2243	0	0	0	0	0	0	0	0	0	0	0	0	0	0	0	0	0	0	0
%totfishCatches	0.0254136	1.08036e-05	0.0456841	0.283552	0.00733285	0.00031578	0.00671718	0.206793	0.00658166	0.0834126	0.0538212	0.0764431	8.24985e-05	0.0164413	0.0560262	0.0271077	0.068404	0.000413072	0.035447
Comparing end of run ratio of scenario vs status quo
SB:SQ	1.03449	1.00364	1.03717	1.03769	0.657945	1.00128	0.991989	0.938664	1.00358	1.00678	0.993655	0.990351	0	1.06242	1.0085	1.23273	0.921851	1.00121	0.720186	0.981722	0.993917	0.994934	1.00012	1.03754	1.01082	0.884206	0.997343	1.03258	0.994065	1.30531	1.02532	0.996934	0.990758	1.06089	0.996045	0.969749	1.0078	1.19292	1.25701	1.19109	1.04492	#DIV/0!	1.01258	1.03449	1.00364	1.03717	1.03769	0.657946	1.00128
BL:SQ	1.11768	0.991824	1.09995	1.82136	8.12751	0.995921	1.26603	5.57175	1.01802	1.39822	1.03902	1.86303	3	1.13348	1.04743	0.858908	0.777328	0.992807	3	0.683474	1.00112	1.00284	0.990812	1.05631	1.04326	0.637988	0.937024	1.03041	0.996946	1.58813	1.35443	0.88785	0.99742	1.05	1.01439	1.04359	1.03526	1.14966	1.64199	1.16497	1.11958	#DIV/0!	1.06333	1.11768	0.991824	1.09995	1.82136	8.12751	0.99592
BSL:SQ	1.76995	0.998036	1.22587	2.19787	9.03665	0.9694	1.10409	3.42689	0.983647	1.30879	1.05992	1.84513	3.5	1.59306	1.09215	2.42967	1.32002	1.01632	3.5	0.587222	1.32647	1.44463	1.00939	0.719635	0.848709	0.76885	0.640876	0.915586	1.04146	3.25384	3.5	8.07725e-05	0.946204	0.863384	0.891519	1.12179	0.553312	0.65226	1.08689	0.659553	1.07723	#DIV/0!	0.287293	1.76995	0.998036	1.22587	2.19787	9.03665	0.9694
WQ:SQ	1.48771	1.0051	1.16406	1.14959	1.25284	1.00329	0.946231	0.969687	0.976854	0.964912	1.02964	1.03755	1.03842	1.25937	1.09528	2.54674	1.20976	1.03332	1.11186	0.790195	1.3362	1.45334	1.05619	0.715749	0.837936	0.974176	0.676301	0.875804	1.04988	3	3.4	6.53072e-05	0.956401	0.791903	0.891875	1.1659	0.643266	0.569867	0.772714	0.575998	0.909523	#DIV/0!	0.279318	1.48771	1.0051	1.16406	1.14959	1.25284	1.00329
FR:SQ	1.76689	0.998187	1.22393	2.23185	9.31923	0.968594	1.10661	3.8549	0.983667	1.31569	1.06044	1.85795	3.5	1.59743	1.0915	2.44444	1.3226	1.01733	3.5	0.581703	1.33051	1.449	1.01409	0.69972	0.861767	0.77258	0.641686	0.916389	1.0419	3.19824	3.5	7.03544e-05	0.944677	0.864794	0.892471	1.47506	0.570839	0.681001	1.05402	0.684339	1.09076	#DIV/0!	0.290982	1.76689	0.998187	1.22393	2.23185	9.31923	0.968594
[truncated: 173 more columns]

## Sheet: metrics_W-Climate
BIOMASS (t)	No Stressors	Size&Catch&NoLBSP	SQ&NoLBSP	Full Regulations			No Stressors	Size&Catch&NoLBSP	SQ&NoLBSP	Full Regulations			No Stressors	Size&Catch&NoLBSP	SQ&NoLBSP	Full Regulations				normalized	No Stressors	Size&Catch&NoLBSP	SQ&NoLBSP	Full Regulations
total biomass fish	5309.07	4517.83	4047	4554.67		species abundance	1.31185	1.11634	1	1.12544		species abundance	0.311855	0.116341	0	0.125443		4607.14	521.919	species abundance	0.910672	0.432063	0.141582	0.459957
landings targeted groups	0	102.608	139.994	101.299		landings targeted groups	0	0.732946	1	0.72359		landings targeted fish groups	-1	-0.267054	0	-0.27641		85.9753	60.059	landings targeted fish groups	0.0761416	0.609089	0.815789	0.600691
total landings	0	138.671	272.604	137.763		total landings	0	0.508692	1	0.50536		total landings	-1	-0.491308	0	-0.49464		137.259	111.296	total landings	0.108735	0.50506	0.888021	0.501805
calcifiers:non-calcifiers	1.15437	0.581531	0.557609	0.5828		reef condition	2.0702	1.0429	1	1.04518		reef condition	1.0702	0.0428994	0	0.0451751		0.719076	0.290424	reef condition	0.933038	0.317892	0.289116	0.319451
biomass herbivores	1344.27	1126.64	1065.79	1137.4		biomass parrotfishes	1.26129	1.05709	1	1.06719		biomass parrotfishes	0.261293	0.0570932	0	0.0671914		1168.52	121.332	biomass parrotfishes	0.926257	0.364964	0.198573	0.398775
biomass parrotfish	1042.84	906.151	872.009	907.948		biomass apex predators	1.19591	1.03915	1	1.04121		biomass apex predators	0.19591	0.0391534	0	0.0412141		932.238	75.5685	biomass apex predators	0.928356	0.364968	0.212722	0.373942
biomass targeted groups	3315.24	2547.52	2161.05	2576.54		biomass targeted groups	1.53409	1.17883	1	1.19226		biomass targeted groups	0.53409	0.178834	0	0.192264		2650.09	482.19	biomass targeted groups	0.916122	0.415774	0.155243	0.439386
total fish landings	0	113.542	166.712	112.642		total fish landings	0	0.681067	1	0.675671		total fish landings	-1	-0.318933	0	-0.324329		98.224	70.1927	total fish landings	0.0808544	0.586373	0.835396	0.581375
Tlcom	2.95401	2.94171	2.90803	2.94257		Tlcom	1.01581	1.01158	1	1.01188
Tlcatch		3.02658	3.06492	3.02643		Tlcatch	0	0.98749	1	0.987441
Biomass (t)	No Stressors	Size&Catch&NoLBSP	SQ&NoLBSP	Full Regulations			Status Quo	Size&Catch&NoLBSP	Watershed	Full Regulations			Status Quo	Size&Catch&NoLBSP	Watershed	Full Regulations				normalized	Control	Size&Catch&NoLBSP	Status Quo & No LBSP	Full Regulations		goal	No stressors	Size&Catch&NoLBSP	StatusQuo&WQ	Full regulations
reef condition	1.15437	0.581531	0.557609	0.5828		reef condition	1	0.503767	0.483044	0.504866		reef condition	0	-0.496233	-0.516956	-0.495134		0.719076	0.290424	reef condition	0.933038	0.317892	0.289116	0.319451		1	0.933038	0.317892	0.289116	0.319451
biomass herb. other	1344.27	1126.64	1065.79	1137.4		biomass herb. other	1	0.838103	0.792837	0.846109		biomass herb. other	0	-0.161897	-0.207163	-0.153891		1168.52	121.332	biomass herb. other	0.926257	0.364964	0.198573	0.398775		2	0.927307	0.364966	0.205647	0.386359
biomass parrotfish	1042.84	906.151	872.009	907.948		biomass parrotfish	1	0.868923	0.836183	0.870646		biomass parrotfish	0	-0.131077	-0.163817	-0.129354		932.238	75.5685	biomass parrotfish	0.928356	0.364968	0.212722	0.373942		3	0.910672	0.432063	0.141582	0.459957
total reef-fish biomass	5309.07	4517.83	4047	4554.67		total reef-fish biomass	1	0.850964	0.76228	0.857903		total reef-fish biomass	0	-0.149036	-0.23772	-0.142097		4607.14	521.919	total reef-fish biomass	0.910672	0.432063	0.141582	0.459957		4	0.784911	0.324959	0.479371	0.429562
# not overfished groups	20	18	16	19		# not overfished groups	1	0.9	0.8	0.95		# not overfished groups	0	-0.1	-0.2	-0.05		18.25	1.70783	# not overfished groups	0.847246	0.441809	0.0938414	0.669725		all equal	0.888982	0.35997	0.278929	0.398832
landings targeted fish groups	130	102.608	139.994	101.299		landings targeted fish groups	1	0.789295	1.07688	0.779219		landings targeted fish groups	0	-0.210705	0.0768792	-0.220781		118.475	19.5166	landings targeted fish groups	0.722575	0.208109	0.8649	0.189399		sum	3.55593	1.43988	1.11572	1.59533
																										conservation	0.924581	0.369972	0.210498	0.388031
																										extraction	0.784911	0.324959	0.479371	0.429562
																										equal weight	0.878024	0.354967	0.300122	0.401875
																										conservation/extraction	0.854746	0.347465	0.344934	0.408797
	3-letter code of functional groups - in red are targeted in shore-based fishery
	FPL	FCO	FIV	TIV	HHW	FDE	FHB	THB	FHG	THG	FHS	FHE	BHP	FPB	TPB	FPM	FPR	RAY	SHR	REP	CRS	CRN	BFF	BC	BM	BD	CEP	BG	BSS	ZD	ZH	ZC	TRF	MA	CCA	PS	PL	PB	BB	DL	DR	DC	DIN	RelFPL	RelFCO	RelFIV	RelTIV	RelHHW	RelFDE
trophic level	3.18	3.09	3.36	3.46	4	2	2	2.21	2.84	2.01	2	2	2.7	4.12	4.09	4.1	4.5	3.3	4.1	2.17
No Stressors	FPL	FCO	FIV	TIV	HHW	FDE	FHB	THB	FHG	THG	FHS	FHE	BHP	FPB	TPB	FPM	FPR	RAY	SHR	REP	CRS	CRN	BFF	BC	BM	BD	CEP	BG	BSS	ZD	ZH	ZC	TRF	MA	CCA	PS	PL	PB	BB	DL	DR	DC	DIN	RelFPL	RelFCO	RelFIV	RelTIV	RelHHW	RelFDE
18615	801.053	37.5119	438.365	818.449	33.8759	71.6413	17.6765	220.996	557.711	476.833	799.71	241.218	11.431	49.1453	266.236	36.3871	228.065	23.269	154.666	135.241	7216.66	13727	21180.5	1385.87	1871.18	1087.74	2156.96	19.1591	11.1421	21905.1	1345.61	0.95789	8238.88	15008.8	5259.18	1267.29	13.8984	10.9421	0.882211	128.843	139.953	0	120052	4.89032	4.07575	3.00885	5.13602	10.5749	0.709009
18980	812.255	37.5234	439.341	818.45	33.9105	71.0102	17.7004	221.268	558.731	477.024	802.301	241.583	11.7503	48.6756	267.815	36.0725	228.226	23.3625	154.855	136.643	7335.05	13791.6	21246.6	1397.36	1857.97	1088.71	2168.53	19.1099	11.0924	22206.7	1337.67	0.988645	8181.54	14984.1	5281.94	1295.57	13.687	11.49	0.926535	135.791	142.182	0	118369	4.9587	4.077	3.01555	5.13603	10.5857	0.702763
19345	823.792	37.2614	440.377	818.138	33.9128	70.2825	17.6858	220.719	559.612	476.737	801.87	241.802	12.0661	48.3379	269.093	35.7438	228.017	23.4633	154.963	137.949	7460.75	13857.4	21291.1	1407.28	1844.09	1093.9	2180.99	19.0452	11.0459	22458.4	1379.13	1.08774	8116.02	14923	5295.86	1833.49	13.4911	14.4132	1.58651	173.224	172.259	0	116802	5.02914	4.04852	3.02266	5.13407	10.5864	0.695562
19710	829.53	37.0066	441.468	818.49	33.9316	69.5308	17.6772	220.272	560.221	476.587	801.753	242.017	12.3887	48.0331	269.997	35.4193	227.805	23.5899	155.078	139.426	7593.85	13945.2	21384.2	1415.52	1869.25	1099.94	2193.71	19.0267	11.007	23187.3	941.642	0.688151	8064.17	14941.1	5321.29	1687.7	13.3238	12.7377	0.95403	150.098	153.562	0	115028	5.06417	4.02085	3.03015	5.13627	10.5923	0.688122
20075	837.03	36.6644	442.605	818.682	33.9266	68.8122	17.6447	219.388	559.581	476.009	799.796	242.17	12.7026	47.6616	270.564	35.0227	227.495	23.6756	155.175	140.478	7717.98	14003	21410.1	1461.75	1850.52	1089.59	2204.08	18.9377	10.9624	24985.1	1712.13	1.37222	8017.27	14857.6	5329.17	991.185	13.0643	9.55306	0.813568	108.014	193.858	0	113211	5.10995	3.98366	3.03796	5.13748	10.5908	0.681011
mean	820.732	37.1935	440.431	818.442	33.9115	70.2554	17.6769	220.528	559.171	476.638	801.086	241.758	12.0677	48.3707	268.741	35.7291	227.922	23.4721	154.948	137.947	7464.86	13864.8	21302.5	1413.56	1858.6	1091.98	2180.85	19.0557	11.05	22948.5	1343.24	1.01893	8123.57	14942.9	5297.49	1415.05	13.4929	11.8272	1.03257	139.194	160.363	0	116692	5.01046	4.04115	3.02303	5.13597	10.586	0.695293
%totfish	0.15459	0.00700565	0.0829582	0.154159	0.00638746	0.0132331	0.00332957	0.041538	0.105324	0.089778	0.15089	0.0455368	0.00227304	0.00911095	0.0506192	0.00672981	0.0429306	0.00442112	0.0291854
Catch & size limit
18615	494.757	37.06	449.354	550.983	13.1063	74.4263	18.465	93.9151	591.749	409.39	774.439	176.985	0.029638	30.9472	196.407	12.2251	89.6401	22.9167	67.9481	199.903	5792.26	9808.53	20881.9	2208.52	2165.82	1193.73	3385.97	21.2024	10.7465	7832.5	1.6e-05	10755.9	8756.19	17710	5843.76	1938.06	26.3687	24.26	1.09522	293.832	161.775	0	395367	3.02042	4.02664	3.08428	3.45759	4.09136	0.736572
18980	492.81	36.9254	445.205	549.034	13.1772	74.3731	18.4774	94.0838	592.677	409.537	776.42	177.32	0.026234	31.3448	196.447	12.0408	89.5116	22.9732	68.2585	203.952	5860.76	9826.56	20982.2	2223.57	2159.18	1080.03	3352.71	21.2262	10.6895	9756.76	1.6e-05	8909.29	8685.73	17774.5	5894.91	1261.18	26.0942	15.3616	1.00387	180.326	159.487	0	390741	3.00854	4.01203	3.0558	3.44536	4.1135	0.736045
19345	486.418	36.5444	440.796	546.941	13.2243	74.2267	18.4512	94.1641	593.486	409.309	775.723	177.58	0.023139	31.5724	196.296	11.8057	89.1515	23.0396	68.4213	207.393	5936.55	9852.19	21187.7	2216.86	2167.31	1139.68	3300.1	21.2016	10.6398	11404.3	3.4e-05	11156.5	8613.59	17747.8	5927.35	1558.57	25.1592	27.9194	2.8204	334.035	213.887	0	390997	2.96951	3.97063	3.02554	3.43222	4.12818	0.734596
19710	544.469	36.2431	436.6	545.972	13.2966	74.0303	18.429	94.1617	594.033	408.99	774.671	177.822	0.020238	31.7388	196.584	11.9211	88.8074	23.1153	68.5831	211.572	6016.19	9881.41	21313.6	2214.61	2163.13	1356.95	3349.37	21.2279	10.5898	12011.3	1.4e-05	12299.1	8550.81	17875.1	5974.78	718.674	24.1487	11.8455	1.21514	140.205	153.649	0	382663	3.32391	3.93789	2.99674	3.42614	4.15077	0.732653
20074.5	552.513	35.8337	432.864	544.492	13.3449	73.7563	18.382	94.1033	593.294	408.378	771.869	177.995	0.017589	31.7724	196.414	11.8079	88.4539	23.1558	68.7394	214.559	6095.41	9911	21458.7	2193.08	2130.24	1214.39	3347.08	21.1718	10.5447	13995.1	1.9e-05	6305.63	8468.85	17823.3	5988.61	1531.29	24.4743	19.0361	0.987233	220.444	163.379	0	380757	3.37302	3.8934	2.97109	3.41686	4.16583	0.72994
	514.193	36.5213	440.964	547.484	13.2299	74.1625	18.4409	94.0856	593.048	409.121	774.625	177.54	0.0233676	31.4751	196.43	11.9601	89.1129	23.0401	68.3901	207.476	5940.23	9855.94	21164.8	2211.33	2157.14	1196.96	3347.05	21.206	10.6421	11000	1.98e-05	9885.28	8615.04	17786.1	5925.88	1401.55	25.249	19.6845	1.42437	233.768	170.435	0	388105	3.13908	3.96812	3.02669	3.43563	4.12993	0.733961
%totfish	0.124991	0.00887765	0.10719	0.133083	0.00321594	0.0180275	0.00448265	0.0228705	0.144159	0.0994497	0.188297	0.0431568	5.68023e-06	0.00765102	0.0477484	0.00290729	0.0216617	0.00560063	0.0166244
18615	2.51286	0.00123	5.12656	31.2203	0.763088	0.03587	0.787847	24.189	0.762453	9.65521	6.13723	8.65688	0.006254	1.77234	6.30565	1.98957	7.34058	0.04682	3.83019	0	0	0	0.314023	0.116788	0	0.094512	2.54597	0.00796	0	26.5385	0	0	0	0	0	0	0	0	0	0	0	0	0	0	0	0	0	0	0
18980	2.49668	0.001236	5.14759	31.2756	0.764199	0.036049	0.792311	24.2883	0.767738	9.70357	6.17605	8.67391	0.005593	1.78262	6.31274	1.96282	7.34312	0.047015	3.83304	0	0	0	0.314537	0.117316	0	0.085444	2.53424	0.00797	0	26.6664	0	0	0	0	0	0	0	0	0	0	0	0	0	0	0	0	0	0	0
19345	2.48227	0.001237	5.13746	31.2319	0.764804	0.036189	0.792263	24.2786	0.767782	9.70775	6.18716	8.67976	0.005023	1.7919	6.315	1.92604	7.33685	0.047097	3.83522	0	0	0	0.316289	0.116826	0	0.078193	2.49974	0.007973	0	26.7024	0	0	0	0	0	0	0	0	0	0	0	0	0	0	0	0	0	0	0
19710	2.52698	0.001233	5.13723	31.2399	0.766732	0.036049	0.792198	24.3198	0.768165	9.70709	6.17134	8.68943	0.004561	1.78593	6.31334	1.91548	7.33264	0.047094	3.83818	0	0	0	0.319356	0.11602	0	0.102871	2.49665	0.007968	0	26.7729	0	0	0	0	0	0	0	0	0	0	0	0	0	0	0	0	0	0	0
20074.5	2.58185	0.001225	5.0978	31.1559	0.767177	0.035839	0.787193	24.2173	0.762831	9.65807	6.13999	8.68017	0.004073	1.78224	6.30343	1.91824	7.32108	0.046892	3.84075	0	0	0	0.32128	0.116054	0	0.096651	2.52015	0.007968	0	26.8376	0	0	0	0	0	0	0	0	0	0	0	0	0	0	0	0	0	0	0
	2.52195	0.00123275	5.13002	31.2258	0.765728	0.0360315	0.790991	24.276	0.766629	9.69412	6.16863	8.68082	0.0048125	1.78568	6.31113	1.93065	7.33342	0.0470245	3.8368	0	0	0	0.317866	0.116554	0	0.0907898	2.5127	0.00796975	0	26.7448	0	0	0	0	0	0	0	0	0	0	0	0	0	0	0	0	0	0	0
%totfishCatches	0.0226575	1.10752e-05	0.0460887	0.280537	0.00687939	0.000323711	0.00710636	0.218099	0.00688749	0.0870931	0.0554198	0.0779895	4.32361e-05	0.0160427	0.0566999	0.0173452	0.0658843	0.000422474	0.0344703
Catch&Size&NoLBSP
18615	749.642	38.5156	481.844	645.471	18.2728	73.7241	16.3136	80.3895	566.127	391.366	746.543	172.29	0.030617	45.1509	204.29	43.0048	150.389	22.8556	83.9697	165.017	1310.94	8699	24676.8	1271.96	1848.06	1568.11	2404.21	20.3522	10.2184	20044.3	2482.67	1.67136	8514.69	16392.2	5646.56	1474.16	14.9401	10.2705	1.31172	125.907	138.329	0	120453	4.57646	4.1848	3.30728	4.05053	5.70417	0.729622
18980	735.798	38.8481	481.645	645.547	18.4029	73.1894	16.2999	80.3305	566.73	391.414	739.634	171.242	0.027063	45.2743	204.14	43.6247	150.028	22.8051	84.0693	167.076	1047.15	8187.68	25133.8	1256.28	1864.63	1580.23	2400.92	20.5995	10.0545	19346.3	1988.68	1.56478	8464.51	16738.6	5751.66	690.671	14.774	6.05353	0.645285	71.534	117.572	0	121915	4.49194	4.22092	3.30592	4.051	5.74476	0.724331
19345	756.699	39.3136	481.367	646.057	18.5074	72.6095	16.2891	80.3448	566.341	391.539	735.496	170.391	0.023848	45.3325	204.247	44.2059	149.89	22.7334	84.1809	169.376	1059.24	8262.53	25407.3	1259.24	1838.57	1555.13	2393.32	20.6094	10.0042	21387.5	1747.76	1.44491	8392.95	16703	5777.07	869.725	14.6177	7.21488	0.710363	84.8081	126.117	0	122075	4.61954	4.2715	3.30401	4.05421	5.77738	0.718592
19710	761.893	39.5926	480.735	646.133	18.5939	71.9685	16.2575	80.2701	565.282	391.572	730.216	169.579	0.020989	45.364	204.232	44.61	149.554	22.6575	84.2087	171.646	703.373	7068.83	25675.7	1254.29	1815.05	1534.28	2375.51	20.6355	9.75776	20504.4	2319.3	1.38253	8390.21	16803.3	5839.58	752.047	14.4437	6.71498	0.672243	79.4885	125.607	0	124556	4.65125	4.30182	3.29967	4.05468	5.80439	0.712248
20074.5	745.432	40.22	479.952	646.114	18.6822	71.325	16.245	80.464	564.857	391.935	726.521	168.844	0.018293	45.3825	204.081	45.0307	149.639	22.5997	84.2636	173.769	728.251	7192.32	26939.8	1243.89	1809.9	1686.17	2402.66	20.8651	9.69372	20197.2	2254.16	1.71128	8319.71	17146.6	5920.59	691.129	14.3219	9.86655	0.788633	113.961	139.745	0	120060	4.55076	4.36998	3.29429	4.05456	5.83197	0.705879
	749.893	39.298	481.108	645.864	18.4918	72.5633	16.281	80.3598	565.867	391.565	735.682	170.469	0.024162	45.3008	204.198	44.0952	149.9	22.7302	84.1384	169.377	969.792	7882.07	25566.7	1257.13	1835.24	1584.78	2395.33	20.6123	9.94572	20295.9	2158.51	1.55497	8416.42	16756.7	5787.09	895.546	14.6195	8.02409	0.825649	95.1398	129.474	0	121812	4.57799	4.26981	3.30223	4.053	5.77254	0.718134
%totfish	0.165985	0.00869841	0.106491	0.142959	0.00409308	0.0160615	0.00360373	0.0177873	0.125252	0.0866711	0.16284	0.0377325	5.34814e-06	0.0100271	0.0451982	0.00976027	0.0331796	0.00503123	0.0186236
18615	2.84031	0.001239	5.2064	32.5493	0.837087	0.035883	0.768934	23.4819	0.755497	9.57788	6.1078	8.60134	0.006373	1.87263	6.32862	3.14759	7.78808	0.046862	4.10234	0	0	0	0.3693	0.067153	0	0.119242	1.80519	0.007616	0	24.5245	0	0	0	0	0	0	0	0	0	0	0	0	0	0	0	0	0	0	0
18980	2.84564	0.00125	5.22873	32.5464	0.83834	0.036015	0.773703	23.6101	0.761037	9.63032	6.13108	8.61019	0.005793	1.8861	6.34344	3.18098	7.82408	0.047013	4.10512	0	0	0	0.37469	0.066579	0	0.11938	1.80588	0.007689	0	24.9495	0	0	0	0	0	0	0	0	0	0	0	0	0	0	0	0	0	0	0
19345	2.83622	0.001253	5.22916	32.5616	0.841214	0.036131	0.774185	23.6148	0.761732	9.62814	6.13989	8.5949	0.005179	1.88786	6.34024	3.18694	7.85191	0.047032	4.10537	0	0	0	0.379943	0.066297	0	0.118084	1.8011	0.007745	0	25.1308	0	0	0	0	0	0	0	0	0	0	0	0	0	0	0	0	0	0	0
19710	2.87325	0.001254	5.23473	32.58	0.84204	0.035915	0.773562	23.613	0.76098	9.63611	6.11485	8.58966	0.004571	1.88813	6.33967	3.19691	7.82203	0.046986	4.10543	0	0	0	0.383595	0.066183	0	0.115779	1.79245	0.007739	0	25.1139	0	0	0	0	0	0	0	0	0	0	0	0	0	0	0	0	0	0	0
20074.5	2.87392	0.00125	5.20652	32.5711	0.843105	0.035703	0.768095	23.4845	0.755976	9.5813	6.0802	8.54094	0.004183	1.87837	6.32991	3.18166	7.77766	0.046789	4.10232	0	0	0	0.399124	0.065736	0	0.125346	1.79247	0.007797	0	25.5773	0	0	0	0	0	0	0	0	0	0	0	0	0	0	0	0	0	0	0
	2.31698	0.001244	5.19951	32.5558	0.818605	0.036164	0.765286	23.4429	0.757598	9.56875	6.12477	8.67695	0.016441	1.85675	6.33028	3.1008	7.83387	0.046815	4.09224	0	0	0	0.312892	0.066075	0	0.096763	1.64308	0.0074	0	23.0032	0	0	0	0	0	0	0	0	0	0	0	0	0	0	0	0	0	0	0
%totfishCatches	0.0204064	1.09563e-05	0.0457938	0.28673	0.00720972	0.000318508	0.00674012	0.20647	0.00667241	0.0842751	0.0539428	0.0764207	0.000144801	0.016353	0.0557528	0.0273098	0.0689955	0.000412315	0.0360417
statusQuo & No LBSP
18615	694.825	39.7521	455.738	390.563	6.1349	74.2057	15.772	66.5954	555.39	355.395	729.216	155.74	0.006941	41.2451	227.351	54.7169	145.423	23.2946	19.468	215.856	1324.12	7497.74	26114	1288.6	1803.61	1932.69	2497.82	19.8538	10.0779	20187.3	4429.16	2.51669	8551.9	15767.8	5767.93	359.542	14.4747	4.18957	0.444612	48.8449	111.535	0	122560	4.24181	4.31914	3.1281	2.45091	1.91511	0.734388
18980	695.135	40.0975	455.846	390.698	6.13198	73.6634	15.7248	66.6048	555.989	355.308	722.169	154.861	0.007354	41.3851	227.221	54.9679	145.567	23.2493	19.4515	219.413	1058.52	7041.18	26541.6	1272.93	1786.83	1899.92	2512.09	20.1213	9.91545	19471.4	2347.95	1.66594	8484.84	15978.6	5830.41	736.714	14.4123	6.95323	0.864716	83.4849	125.616	0	125807	4.2437	4.35667	3.12884	2.45175	1.9142	0.729021
19345	697.688	40.5807	455.425	390.518	6.12623	73.1271	15.6857	66.5925	555.642	355.259	717.687	154.127	0.008076	41.4341	227.116	55.0075	145.831	23.1769	19.4424	223.215	1071.71	7090.39	26836.4	1272.72	1770.12	1858.21	2506.79	20.1217	9.86675	20621.1	1872.69	1.51386	8417.83	15940.9	5859.54	857.94	14.3165	7.82945	0.719197	91.6402	128.885	0	127591	4.25929	4.40918	3.12595	2.45062	1.9124	0.723713
19710	712.521	40.86	455.388	390.562	6.11953	72.5455	15.6377	66.4712	554.733	355.143	712.193	153.436	0.009043	41.484	227.256	54.8863	145.822	23.1051	19.415	226.965	712.191	6068.37	27142.4	1271.14	1753.66	1818.69	2492.49	20.1588	9.62632	20695.4	1907.33	1.29936	8413.18	16072.9	5921.37	812.306	14.0531	7.09865	0.653875	83.1717	123.538	0	129882	4.34985	4.43952	3.12569	2.4509	1.91031	0.717958
20074.5	721.929	41.4579	455.512	390.625	6.11445	71.9195	15.6107	66.4121	554.302	355.208	707.888	152.728	0.008403	41.4977	227.519	54.7089	146.123	23.0533	19.4062	230.284	734.964	6130.8	27579.3	1272.96	1740.38	1796.44	2471.62	20.2116	9.54419	20939.2	2858.01	1.80891	8355.15	16091.2	5960.52	1388.19	13.8556	8.80355	1.07023	110.435	145.165	0	130523	4.40728	4.50449	3.12654	2.45129	1.90873	0.711762
	704.42	40.5496	455.582	390.593	6.12542	73.0922	15.6862	66.5352	555.211	355.263	717.831	154.178	0.0079634	41.4092	227.293	54.8575	145.753	23.1759	19.4366	223.146	980.302	6765.69	26842.7	1275.67	1770.92	1861.19	2496.16	20.0934	9.80613	20382.9	2683.03	1.76095	8444.58	15970.3	5867.95	830.937	14.2224	6.97489	0.750527	83.5154	126.948	0	127273	4.30038	4.4058	3.12702	2.45109	1.91215	0.723368
%totfish	0.17406	0.0100197	0.112573	0.0965143	0.00151357	0.0180608	0.00387601	0.0164406	0.137191	0.0877842	0.177374	0.038097	1.96773e-06	0.0102321	0.0561633	0.0135551	0.0360151	0.00572668	0.00480273
18615	9.94832	0.0028	10.6976	51.8395	0.898981	0.051033	1.04145	26.7823	1.65112	13.7003	9.41883	10.8916	0.001971	2.93295	6.74036	5.33539	10.6588	0.058086	3.56027	0	0	0	1.69574	0.258222	0	0.611495	7.73841	0.030095	0	93.1573	0	0	0	0	0	0	0	0	0	0	0	0	0	0	0	0	0	0	0
18980	10.289	0.002832	10.7307	51.9642	0.899168	0.050832	1.04158	26.823	1.65603	13.7216	9.34577	10.8473	0.000325	2.94941	6.74944	5.36908	10.6861	0.058118	3.56162	0	0	0	1.75819	0.257202	0	0.640412	7.77014	0.030551	0	95.6454	0	0	0	0	0	0	0	0	0	0	0	0	0	0	0	0	0	0	0
19345	10.3214	0.002859	10.7381	52.0073	0.898651	0.05059	1.03923	26.841	1.65564	13.7342	9.27142	10.8029	9.8e-05	2.95838	6.7471	5.3847	10.6975	0.05798	3.55952	0	0	0	1.78101	0.256541	0	0.627194	7.7787	0.030731	0	95.9787	0	0	0	0	0	0	0	0	0	0	0	0	0	0	0	0	0	0	0
19710	10.3027	0.002891	10.7381	52.0208	0.897678	0.050318	1.03784	26.8546	1.65512	13.7431	9.23494	10.7698	4.4e-05	2.96232	6.75181	5.3766	10.7201	0.057828	3.55758	0	0	0	1.79975	0.257335	0	0.612415	7.74866	0.030698	0	95.9257	0	0	0	0	0	0	0	0	0	0	0	0	0	0	0	0	0	0	0
20074.5	10.5463	0.002921	10.7656	52.1255	0.897312	0.050081	1.03734	26.8642	1.65564	13.7752	9.17762	10.763	0.001728	2.96855	6.76434	5.3574	10.7319	0.0577	3.55631	0	0	0	1.81947	0.258086	0	0.598102	7.69107	0.030827	0	96.6406	0	0	0	0	0	0	0	0	0	0	0	0	0	0	0	0	0	0	0
	10.2815	0.0028606	10.734	51.9915	0.898358	0.0505708	1.03949	26.833	1.65471	13.7349	9.28972	10.8149	0.0008332	2.95432	6.75061	5.36463	10.6989	0.0579424	3.55906	0	0	0	1.77083	0.257477	0	0.617924	7.7454	0.0305804	0	95.4696	0	0	0	0	0	0	0	0	0	0	0	0	0	0	0	0	0	0	0
%totfishCatches	0.0616724	1.7159e-05	0.0643867	0.311864	0.00538869	0.000303343	0.00623525	0.160955	0.00992557	0.0823871	0.0557232	0.0648718	4.99785e-06	0.0177211	0.0404927	0.0321791	0.0641759	0.00034756	0.0213486
Full Reg.
18615	750.464	38.5657	481.616	657.07	19.1432	73.6612	16.3394	89.1327	566.048	393.358	746.815	173.881	0.060629	45.4505	204.442	43.5097	151.077	22.8636	87.2211	163.739	1310.97	8701.94	24598.9	1273.07	1867.08	1573.44	2433.11	20.2601	10.219	21090.4	2306.42	1.53321	8511.03	16303.7	5646.03	729.508	14.7411	6.51824	0.662639	76.9508	122.043	0	121321	4.58148	4.19024	3.30571	4.12331	5.97587	0.729
18980	753.235	38.8955	481.474	657.206	19.2556	73.1218	16.3247	89.1466	566.537	393.353	739.707	172.784	0.055402	45.577	204.365	44.075	150.75	22.8157	87.3254	165.793	1046.47	8185.33	25736.9	1259.48	1853.9	1710.26	2433.4	20.5048	10.0552	20296.7	3728.82	2.33622	8478.19	16736.7	5761.2	356.8	14.4708	4.56409	0.50508	52.9506	115.19	0	116561	4.5984	4.22608	3.30474	4.12417	6.01097	0.723661
19345	743.198	39.3589	480.396	656.519	19.3464	72.5299	16.3113	89.3285	566.249	393.51	735.825	171.927	0.050578	45.5539	204.007	44.4154	150.485	22.7341	87.4411	168.065	1059.83	8276.11	26128.2	1246.17	1835.78	1677.77	2446.91	20.6251	10.0136	19648.5	2257.93	1.62034	8391.14	16762.7	5789.9	744.904	14.3939	7.05707	0.724834	83.4379	127.949	0	119277	4.53712	4.27642	3.29735	4.11986	6.03931	0.717803
19710	769.325	39.6513	480.011	657.037	19.4372	71.9029	16.2808	89.3781	565.269	393.539	730.705	171.105	0.046019	45.5585	204.143	44.764	150.189	22.6599	87.4878	170.343	704.631	7082.53	26380.7	1252.04	1814.75	1626.14	2448.43	20.6527	9.76817	21811.6	1988.13	1.27317	8376.8	16850.3	5849.61	806.679	14.25	7.05826	0.684692	82.8292	126.602	0	119519	4.69662	4.30819	3.2947	4.12311	6.06766	0.711599
20074.5	774.179	40.2714	479.542	657.302	19.5207	71.2013	16.2581	89.669	564.695	393.851	726.668	170.322	0.041782	45.5804	204.246	45.114	150.325	22.6062	87.55	172.35	727.475	7176.59	26674.7	1247.61	1798.15	1595.74	2432.41	20.6927	9.68732	20868.8	2323.24	1.60523	8318.02	16886.7	5889.92	704.013	14.1058	6.6003	0.714672	77.7695	126.716	0	122633	4.72626	4.37558	3.29148	4.12477	6.0937	0.704655
	758.08	39.3485	480.608	657.027	19.3406	72.4834	16.3029	89.331	565.76	393.522	735.944	172.004	0.050882	45.5441	204.241	44.3756	150.565	22.7359	87.4051	168.058	969.875	7884.5	25903.9	1255.67	1833.93	1636.67	2438.85	20.5471	9.94866	20743.2	2520.91	1.67363	8415.04	16708	5787.33	668.381	14.3923	6.35959	0.658383	74.7876	123.7	0	119862	4.62798	4.2753	3.2988	4.12304	6.0375	0.717344
%totfish	0.16644	0.00863917	0.10552	0.144253	0.00424633	0.0159141	0.00357938	0.0196131	0.124215	0.0863998	0.16158	0.0377643	1.11714e-05	0.00999943	0.044842	0.00974289	0.0330573	0.00499178	0.0191902
18615	2.77966	0.001219	5.11324	31.9725	0.820429	0.035497	0.753515	23.4014	0.737861	9.3743	5.99494	8.44779	0.010637	1.85903	6.26092	3.11192	7.67833	0.046258	3.99371	0	0	0	0.29008	0.062439	0	0.09555	1.63333	0.006978	0	22.4903	0	0	0	0	0	0	0	0	0	0	0	0	0	0	0	0	0	0	0
18980	2.81288	0.001229	5.13849	31.9809	0.821108	0.035635	0.758388	23.5506	0.742471	9.43257	6.0173	8.46492	0.009799	1.87017	6.26589	3.13678	7.71257	0.046361	3.99047	0	0	0	0.296389	0.062116	0	0.097853	1.62408	0.007033	0	22.7833	0	0	0	0	0	0	0	0	0	0	0	0	0	0	0	0	0	0	0
19345	2.82054	0.001232	5.13807	31.9825	0.82299	0.035723	0.760279	23.5349	0.744283	9.43452	6.03584	8.44655	0.009003	1.87443	6.26382	3.14516	7.74551	0.046343	3.99068	0	0	0	0.307248	0.06125	0	0.10302	1.63443	0.007114	0	23.2217	0	0	0	0	0	0	0	0	0	0	0	0	0	0	0	0	0	0	0
19710	2.80813	0.001234	5.14022	31.9725	0.824043	0.035578	0.757909	23.5562	0.742842	9.43425	6.00593	8.44232	0.008335	1.87261	6.26821	3.14949	7.71053	0.04631	3.99008	0	0	0	0.310294	0.06125	0	0.100117	1.63838	0.007121	0	23.2305	0	0	0	0	0	0	0	0	0	0	0	0	0	0	0	0	0	0	0
20074.5	2.84748	0.001229	5.10936	31.967	0.82528	0.035327	0.753618	23.4253	0.738353	9.37812	5.97307	8.39943	0.007644	1.86169	6.2645	3.13734	7.66934	0.046224	3.99095	0	0	0	0.312511	0.061033	0	0.096555	1.63361	0.007142	0	23.3604	0	0	0	0	0	0	0	0	0	0	0	0	0	0	0	0	0	0	0
	2.81374	0.0012286	5.12788	31.9751	0.82277	0.035552	0.756742	23.4937	0.741162	9.41075	6.00542	8.4402	0.0090836	1.86759	6.26467	3.13614	7.70326	0.0462992	3.99118	0	0	0	0.303304	0.0616176	0	0.098619	1.63277	0.0070776	0	23.0172	0	0	0	0	0	0	0	0	0	0	0	0	0	0	0	0	0	0	0
%totfishCatches	0.0249794	1.09071e-05	0.0455235	0.283864	0.00730427	0.000315618	0.00671809	0.208569	0.00657978	0.0835454	0.053314	0.0749292	8.0641e-05	0.0165798	0.0556155	0.0278416	0.0683868	0.000411028	0.0354323
[truncated: 44 more columns]

## Sheet: FuncGroups
Comparing biomass functiona groups at end of 45 year biomass (average of last 5 years)
		FPL	FCO	FIV	TIV	HHW	FDE	FHB	THB	FHG	THG	FHS	FHE	BHP	FPB	TPB	FPM	FPR	RAY	SHR	REP	CRS	CRN	BFF	BC	BM	BD	CEP	BG	BSS	ZD	ZH	ZC	TRF	MA	CCA	PS	PL	PB	BB	DL	DR	DC	DIN	RelFPL	RelFCO	RelFIV	RelTIV	RelHHW
status quo	20074.5	460.156	37.0408	402.686	292.624	2.11313	74.7512	14.7245	22.0419	579.999	296.103	744.659	99.098	0.0003384	27.0674	196.437	15.1872	113.334	23.2415	10.8036	295.003	5968.64	9885.39	21185.8	2130.76	2082.23	1680.77	3520.48	20.2762	10.692	7470.13	1.58e-05	11841.8	8643.1	16490.8	5858.04	1333.1	24.2516	20.2802	1.04891	235.924	155.901	0	370703	2.80919	4.02456	2.76396	1.83631	0.65965
size	20074.5	476.029	37.1757	417.653	303.653	1.39033	74.8471	14.6066	20.6899	582.074	298.11	739.934	98.1418	0	28.7571	198.106	18.7217	104.477	23.2697	7.78058	289.611	5932.34	9835.31	21188.3	2210.75	2104.75	1486.14	3511.13	20.9367	10.6285	9750.82	1.62e-05	11805.5	8563.22	17494.8	5834.88	1292.77	24.4408	24.1925	1.31849	281.006	162.904	0	375366	2.90609	4.03922	2.86669	1.90552	0.434014
catch	20074.5	514.305	36.7379	442.933	532.974	17.1745	74.4462	18.6417	122.812	590.453	414.018	773.716	184.623	0.137305	30.6803	205.754	13.0444	88.098	23.0744	70.5549	201.627	5975.35	9913.46	20991.2	2250.74	2172.31	1072.31	3298.77	20.8928	10.6593	11863.5	2.14e-05	10513.7	8620.8	17315.3	5942.32	1391.21	25.1066	23.3152	1.7223	274.845	174.544	0	394181	3.13976	3.99166	3.04021	3.34458	5.36131
SizeCatch	20074.5	514.193	36.5213	440.964	547.484	13.2299	74.1625	18.4409	94.0856	593.048	409.121	774.625	177.54	0.0233676	31.4751	196.43	11.9601	89.1129	23.0401	68.3901	207.476	5940.23	9855.94	21164.8	2211.33	2157.14	1196.96	3347.05	21.206	10.6421	11000	1.98e-05	9885.28	8615.04	17786.1	5925.88	1401.55	25.249	19.6845	1.42437	233.768	170.435	0	388105	3.13908	3.96812	3.02669	3.43563	4.12993
Status quo & No LBSP	20074.5	684.577	37.2298	468.752	336.399	2.64742	74.9973	13.9328	21.3737	566.574	285.714	766.729	102.819	0.0003514	34.0879	215.154	38.6778	137.107	24.0159	12.012	233.11	7975.29	14366.8	22376.3	1525.09	1744.78	1637.36	2380.91	17.7579	11.2253	23049.6	739.116	0.773353	8266.27	13059.1	5224.64	1554.26	15.6002	11.557	0.810507	135.892	141.796	0	103544	4.17925	4.0451	3.21742	2.11101	0.826436
SizeCatchNoLBSP	20074.5	814.453	36.968	493.643	643.151	19.0956	72.4638	16.2572	75.5351	570.514	387.538	789.278	182.849	0.024714	43.12	214.539	36.8997	149.604	23.6209	84.1806	173.233	7917.25	14280.7	21384.8	1533.37	1767.21	1292.26	2256.19	18.5646	11.1353	24306.6	983.413	0.95649	8178.14	14237.9	5222.56	1495.46	13.4187	13.2279	1.14005	155.604	167.942	0	106500	4.97212	4.01665	3.38827	4.03597	5.96102
FullReg.	20074.5	813.043	36.9736	492.862	653.094	19.6928	72.4035	16.2943	84.9693	570.525	389.581	789.665	184.119	0.0523868	43.2383	214.411	37.1241	149.896	23.6443	87.286	171.604	7941.33	14323.9	21484.4	1490.94	1794.4	1298.52	2259.04	18.5809	11.1399	23891.2	693.531	0.833122	8164.94	14261.1	5228.13	1966.41	13.8438	13.8108	1.10558	161.452	170.05	0	107868	4.96352	4.01726	3.3829	4.09836	6.14743
no drivers	20074.5	820.732	37.1935	440.431	818.442	33.9115	70.2554	17.6769	220.528	559.171	476.638	801.086	241.758	12.0677	48.3707	268.741	35.7291	227.922	23.4721	154.948	137.947	7464.86	13864.8	21302.5	1413.56	1858.6	1091.98	2180.85	19.0557	11.05	22948.5	1343.24	1.01893	8123.57	14942.9	5297.49	1415.05	13.4929	11.8272	1.03257	139.194	160.363	0	116692	5.01046	4.04115	3.02303	5.13597	10.586
mean	20074.5	637.186	36.9801	449.991	515.978	13.6569	73.5409	16.3219	82.7545	576.545	369.603	772.461	158.868	1.53828	35.8496	213.696	25.918	132.444	23.4224	61.9944	213.702	6889.41	12040.8	21384.8	1845.82	1960.17	1344.54	2844.3	19.6588	10.8965	16785.1	469.912	5506.23	8396.88	15698.5	5566.74	1481.23	19.4255	17.2369	1.20035	202.211	162.992
sd		162.93	0.244713	32.9535	190.847	11.2995	1.67955	1.80928	67.694	11.8453	68.9333	21.6077	52.7759	4.25479	7.93385	23.7108	12.1463	45.8697	0.330941	50.6307	56.1658	1012.32	2323.05	427.845	382.699	185.559	234.025	621.573	1.3238	0.262556	7350.82	538.798	5919.77	232.818	1795.37	348.352	212.879	5.75323	5.20871	0.280879	60.7332	10.4857
NORMALIZED		FPL	FCO	FIV	TIV	HHW	FDE	FHB	THB	FHG	THG	FHS	FHE	BHP	FPB	TPB	FPM	FPR	RAY	SHR	REP	CRS	CRN	BFF	BC	BM	BD	CEP	BG	BSS	ZD	ZH	ZC	TRF	MA	CCA	PS	PL	PB	BB	DL	DR	DC	DIN	RelFPL	RelFCO	RelFIV	RelTIV	RelHHW
	status quo	0.138619	0.597932	0.0755743	0.120934	0.153481	0.764426	0.188656	0.184894	0.614697	0.143157	0.0991016	0.128705	0.358878	0.134163	0.233336	0.188493	0.338484	0.292398	0.155993	0.926126	0.181526	0.176748	0.320965	0.771734	0.744654	0.924601	0.861669	0.679508	0.21796	0.102543	0.191564	0.857743	0.85487	0.670495	0.798486	0.24327	0.799226	0.720477	0.29489	0.710589	0.249451	#DIV/0!	1.01258	1.03449	1.00364	1.03717	1.03769	0.657946
	size limit	0.161302	0.787976	0.16322	0.132953	0.138831	0.781626	0.17155	0.179613	0.679681	0.149837	0.0661168	0.124938	0.358848	0.185672	0.255425	0.276769	0.271032	0.322288	0.142136	0.911737	0.17222	0.171212	0.323076	0.829851	0.782046	0.727441	0.858319	0.832806	0.153672	0.169301	0.191564	0.856359	0.762522	0.841471	0.779267	0.188007	0.808326	0.909124	0.662978	0.902754	0.496658	#DIV/0!	1.06333	1.11768	0.991824	1.09995	1.82136	8.12751
	catch limit	0.225366	0.161196	0.41521	0.535482	0.622216	0.705074	0.900109	0.722988	0.879836	0.740318	0.523144	0.687225	0.370976	0.257345	0.368818	0.1446	0.166827	0.146504	0.567132	0.414893	0.183279	0.1799	0.178788	0.854989	0.873523	0.122365	0.76766	0.824369	0.183137	0.251581	0.191564	0.801194	0.831918	0.816084	0.85952	0.336199	0.838294	0.878384	0.968435	0.884142	0.864709	#DIV/0!	0.279318	1.48771	1.0051	1.16406	1.14959	1.25284
	size&catch limit	0.22516	0.0304104	0.392073	0.565563	0.484927	0.644359	0.879244	0.566468	0.918226	0.716773	0.539872	0.638255	0.360903	0.290691	0.233238	0.125249	0.172418	0.124044	0.550261	0.455871	0.174218	0.173479	0.303598	0.830233	0.855756	0.264148	0.790693	0.87874	0.166203	0.215642	0.191564	0.770269	0.825624	0.877541	0.84872	0.354107	0.844284	0.680788	0.787445	0.698333	0.761102	#NUM!	0.287293	1.76995	0.998036	1.22587	2.19787	9.03665
	status quo & no LBSP	0.614423	0.846278	0.715439	0.173363	0.164946	0.807067	0.0933422	0.182272	0.199959	0.111809	0.395383	0.14411	0.358879	0.412137	0.524516	0.853257	0.540489	0.963555	0.161773	0.635164	0.858289	0.841653	0.989764	0.200997	0.122859	0.894579	0.227978	0.0755086	0.894725	0.802957	0.691335	0.176182	0.287391	0.0707653	0.163037	0.634227	0.253063	0.137753	0.0825794	0.137423	0.0216181	#NUM!	0.290982	1.76689	0.998187	1.22393	2.23185	9.31923
	size & bag & no LBSP	0.861701	0.48033	0.907358	0.747411	0.684858	0.260671	0.485744	0.457535	0.305333	0.602636	0.781795	0.675223	0.361021	0.820266	0.514167	0.817034	0.645835	0.725726	0.669378	0.2356	0.845026	0.832528	0.500051	0.207128	0.149185	0.411614	0.172032	0.204226	0.818394	0.846899	0.829717	0.17619	0.173719	0.207949	0.161567	0.526659	0.148227	0.220748	0.415017	0.221424	0.681561	#DIV/0!	0.290982	1.76689	0.998187	1.22393	2.23185	9.31923
	full regulations	0.859783	0.489444	0.903363	0.763763	0.703389	0.249144	0.493922	0.51305	0.305664	0.614024	0.787036	0.683833	0.363459	0.824148	0.512015	0.821889	0.648201	0.748755	0.691297	0.226773	0.850626	0.837148	0.592046	0.176883	0.185821	0.422066	0.173204	0.207733	0.823031	0.833158	0.660941	0.176185	0.159562	0.21168	0.165517	0.98867	0.165977	0.255345	0.367905	0.251075	0.749567	#DIV/0!	0.314786	1.7836	1.00412	1.09373	2.7969	16.048
	biomass									SE
	apex predators	target invertivores	target herbivores		plantivores	filter feeders	prim prod	macroinverts		apex predators	target invertivores	target herbivores	plantivores	filter feeders	prim prod	macroinverts
status quo	0.223811	0.137208	0.182947		0.138619	0.226413	0.673269	0.764392		0.0325721	0.0115071	0.0412363		0.038617	0.128952	0.0327028
size limit	0.242221	0.135892	0.175871		0.161302	0.643887	0.675919	0.825756		0.0269713	0.00207836	0.0441871		0.0411955	0.141699	0.0137781
catch limit	0.275204	0.578849	0.60893		0.225366	0.543547	0.736403	0.830135		0.0682327	0.0306651	0.0633666		0.00110245	0.115809	0.0200571
size&catch limit	0.249317	0.525245	0.564454		0.22516	0.584196	0.750055	0.838855		0.0657108	0.0285091	0.0531748		0.0353138	0.114703	0.016337
status quo & no LBSP	0.575955	0.169154	0.238491		0.614423	0.48663	0.281697	0.156835		0.119641	0.00297599	0.0518555		0.0382482	0.110665	0.0303932
size & bag & no LBSP	0.698734	0.716135	0.575642		0.861701	0.351804	0.243624	0.183143		0.0473352	0.022116	0.0672772		0.0922364	0.0825034	0.01198
full regulations	0.707717	0.733576	0.592281		0.859783	0.368683	0.338282	0.18591		0.0484377	0.0213457	0.0649372		0.0686161	0.188062	0.00670445
compared to Status Quo
	apex predators	target invertivores	target herbivores	non-target fish	plantivores	filter feeders	prim prod	macroinverts
status quo	64.3452	147.369	232.381	221.84	460.156	12346.6	6469.85	1574.2
size limit	63.5188	152.522	231.375	225.271	476.029	12318.7	6642.02	1557.39
catch limit	71.8676	275.074	299.061	232.642	514.305	12293.3	6658.95	1470.95
size&catch limit	70.068	280.357	291.079	232.627	514.193	12320.3	6750.77	1490.72
status quo & no LBSP	76.8426	169.523	235.327	232.297	684.577	14906.1	5623.97	1219.52
size & bag & no LBSP	91.994	331.124	287.045	237.969	814.453	14527.6	5829.49	1146.45
full regulations	92.5999	336.393	289.677	237.812	813.043	14583.2	5926.89	1145.44
compared to SQ
	apex predators	target invertivores	target herbivores	non-target fish groups	planktivores	filter feeders	prim prod	macroinverts
status quo	0	0	0	0	0	0	0	0
size limit	-0.0128436	0.0349666	-0.00432638	0.0154662	0.0344946	-0.00226412	0.0266115	-0.01068
catch limit	0.116907	0.866572	0.286946	0.0486933	0.117676	-0.00431653	0.0292276	-0.0655914
size&catch limit	0.0889389	0.90242	0.252596	0.0486254	0.117433	-0.00212885	0.0434195	-0.0530311
status quo & no LBSP	0.194224	0.150334	0.0126795	0.0471373	0.487707	0.207306	-0.130742	-0.225309
size & bag & no LBSP	0.429694	1.2469	0.235236	0.0727049	0.76995	0.176645	-0.0989767	-0.271723
full regulations	0.439111	1.28266	0.246565	0.0719949	0.766888	0.181149	-0.0839223	-0.272369
[truncated: 44 more columns]

## Sheet: size distribution
Numbers per size class after 40 year simulation									Normalization										COMPARED TO STATUS QUO
	StatusQuo	Catch	Size-limit	Size-limit & TAC	Status Quo & NoLBSP	No stressors	Full Regulation		mean	SD	StatusQuo	Catch	Size	Catch&Size	StatusQuo&NoLBSP	NoStressors	Full Regulation		Status Quo	Bag	Size	Catch&Size	StatusQuo&NoLBSP	NoStressors	Full Regulation
Planktiv_Fish1_Nums	683276	706511	692677	701148	696627	725400	704168		701401	13147.7	0.0840164	0.651231	0.253503	0.492315	0.358261	0.966024	0.583349		1	1.034	1.01376	1.02616	1.01954	1.06165	1.03058
Planktiv_Fish2_Nums	682212	677411	682537	678919	672243	703745	680685		682536	9988.8	0.48706	0.303947	0.500048	0.358647	0.151392	0.983135	0.426485		1	0.992963	1.00048	0.995174	0.985387	1.03156	0.997761
Planktiv_Fish3_Nums	593771	641033	616872	634214	637918	676655	652079		636077	26117.3	0.0526319	0.575251	0.231059	0.471556	0.528096	0.939868	0.729952		1	1.0796	1.0389	1.06811	1.07435	1.13959	1.0982
Planktiv_Fish4_Nums	604410	598890	619658	609293	596391	644383	618480		613072	16440.2	0.299136	0.194167	0.655635	0.409088	0.155138	0.971579	0.628907		1	0.990867	1.02523	1.00808	0.986733	1.06614	1.02328
Planktiv_Fish5_Nums	550035	592295	558866	592531	555533	614490	588714		578924	24182.4	0.116121	0.709847	0.203435	0.713174	0.166711	0.929324	0.657212		1	1.07683	1.01606	1.07726	1.01	1.11718	1.07032
Planktiv_Fish6_Nums	552312	607369	564594	609234	521513	588432	571812		573609	31306.8	0.248168	0.859562	0.386687	0.872422	0.0480486	0.68206	0.477102		1	1.09968	1.02224	1.10306	0.944235	1.0654	1.0353
Planktiv_Fish7_Nums	561536	620240	572421	623220	504381	560619	551982		570628	41129.3	0.412522	0.886136	0.517379	0.899498	0.0536212	0.403859	0.325144		1	1.10454	1.01938	1.10985	0.898216	0.998366	0.982986
Planktiv_Fish8_Nums	547522	609520	572399	613048	462938	518187	471625		542177	61007.8	0.534906	0.865171	0.689835	0.877315	0.0970011	0.347073	0.12375		1	1.11324	1.04544	1.11968	0.845516	0.946422	0.861381
Planktiv_Fish9_Nums	523429	592293	547093	595639	403670	506042	451521		517098	70771	0.535642	0.855996	0.664157	0.866455	0.054495	0.437927	0.177064		1	1.13156	1.04521	1.13795	0.771203	0.966781	0.862621
Planktiv_Fish10_Nums	505292	581385	530624	584576	392554	485364	473912		507673	66795.5	0.485787	0.865106	0.634432	0.875202	0.0424039	0.369194	0.30663		1	1.15059	1.05013	1.15691	0.776885	0.96056	0.937898
Coraliv_Fish1_Nums	128357	128263	128538	128253	127886	127737	127822		128122	305.41	0.778829	0.677932	0.913339	0.665548	0.219611	0.103313	0.162798		1	0.999271	1.00141	0.99919	0.996332	0.995167	0.995833
Coraliv_Fish2_Nums	112745	112754	113010	112750	112174	111786	112148		112481	444.223	0.723705	0.730697	0.882952	0.727717	0.244913	0.0588574	0.226755		1	1.00008	1.00235	1.00005	0.994939	0.991496	0.994707
Coraliv_Fish3_Nums	82437	82600.9	82594.4	82583	81535.1	81111.7	81536.8		82057	637.996	0.724274	0.803048	0.800193	0.795177	0.206676	0.0692221	0.207435		1	1.00199	1.00191	1.00177	0.98906	0.983924	0.98908
Coraliv_Fish4_Nums	54209.3	54398	54253.4	54379.2	53220.5	52901.9	53227.2		53798.5	650.229	0.736217	0.821731	0.757936	0.814102	0.187011	0.0839541	0.189815		1	1.00348	1.00082	1.00314	0.98176	0.975882	0.981884
Coraliv_Fish5_Nums	40328.7	40481.2	40351.2	40465	39496	39206.4	39494.1		39974.6	549.922	0.740157	0.821492	0.753256	0.813728	0.192021	0.0812074	0.191082		1	1.00378	1.00056	1.00338	0.979351	0.972171	0.979304
Coraliv_Fish6_Nums	32074.1	32206.5	32091.3	32193.2	31381.6	31108.3	31378		31776.1	466.804	0.738358	0.821737	0.750188	0.814171	0.199001	0.0762561	0.196873		1	1.00413	1.00054	1.00371	0.978409	0.969888	0.978298
Coraliv_Fish7_Nums	26608.3	26721.3	26623.3	26710.2	26023.9	25769.3	26019.7		26353.7	400.333	0.737622	0.820713	0.74966	0.813405	0.205009	0.0721607	0.202055		1	1.00424	1.00056	1.00383	0.978035	0.968466	0.977878
Coraliv_Fish8_Nums	22722.8	22818.3	22747	22809.1	22224.6	21983.7	22219.1		22503.5	348.487	0.73539	0.816791	0.757659	0.809702	0.21173	0.0679115	0.207241		1	1.0042	1.00107	1.0038	0.978075	0.967476	0.977835
Coraliv_Fish9_Nums	19814.4	19899	19843.9	19891.2	19385.3	19157	19377.4		19624	307.559	0.732016	0.814333	0.762703	0.807516	0.21881	0.0644292	0.211315		1	1.00427	1.00149	1.00388	0.978345	0.966821	0.977947
Coraliv_Fish10_Nums	17547.3	17619.1	17579.5	17611.4	17170.2	16958.7	17160.8		17378.1	273.258	0.732022	0.811076	0.769386	0.803332	0.223336	0.0623935	0.213232		1	1.00409	1.00184	1.00365	0.978511	0.966458	0.977977
Invertiv_Fish1_Nums	232676	233802	232939	233647	233350	232052	233729		233171	647.987	0.222432	0.835096	0.36045	0.768741	0.608903	0.04215	0.805617		1	1.00484	1.00113	1.00417	1.0029	0.99732	1.00453
Invertiv_Fish2_Nums	212941	215860	213009	215326	213878	211533	215026		213939	1552.08	0.260052	0.892079	0.274439	0.81433	0.48432	0.0605304	0.758241		1	1.01371	1.00032	1.0112	1.0044	0.993388	1.00979
Invertiv_Fish3_Nums	188123	194171	190060	194359	189164	187381	193030		190898	2916.08	0.170597	0.869128	0.386854	0.88237	0.275984	0.113881	0.767641		1	1.03215	1.0103	1.03315	1.00553	0.996058	1.02609
Invertiv_Fish4_Nums	161093	169893	164154	170514	162105	159180	167814		164965	4481.14	0.193809	0.864301	0.42818	0.892208	0.261704	0.098375	0.73752		1	1.05463	1.019	1.05848	1.00628	0.988124	1.04172
Invertiv_Fish5_Nums	140520	150344	143959	151261	141680	138189	148721		144953	5166.48	0.195415	0.851606	0.423669	0.888943	0.26316	0.0952277	0.767066		1	1.06991	1.02447	1.07644	1.00825	0.983414	1.05836
Invertiv_Fish6_Nums	123754	134412	127700	135344	124649	121147	132876		128555	5671.25	0.198666	0.849145	0.440093	0.884395	0.245495	0.095757	0.776958		1	1.08612	1.03188	1.09365	1.00723	0.978933	1.07371
Invertiv_Fish7_Nums	110025	121217	114081	122242	110844	107185	119773		115052	6025.17	0.202005	0.846895	0.435959	0.883608	0.242451	0.0958063	0.783346		1	1.10173	1.03687	1.11104	1.00745	0.974188	1.08861
Invertiv_Fish8_Nums	98733.7	110613	103010	111822	99349.3	95712.4	108609		103978	6392.58	0.205981	0.850342	0.439762	0.890093	0.234489	0.0979918	0.765565		1	1.12032	1.04331	1.13256	1.00624	0.969399	1.10002
Invertiv_Fish9_Nums	89267.8	101166	93459	102400	89528.4	86621.5	99160.8		94514.8	6374.62	0.205223	0.851617	0.434228	0.89195	0.217042	0.107814	0.766947		1	1.13329	1.04695	1.14711	1.00292	0.970355	1.11082
Invertiv_Fish10_Nums	81269.9	92820.1	85279.4	94035.7	81774.4	78835.8	91300.4		86473.7	6187.15	0.200156	0.847494	0.42347	0.889187	0.223769	0.108514	0.782341		1	1.14212	1.04934	1.15708	1.00621	0.97005	1.12342
Target_Invertiv_Fish1_Nums	126186	132787	127656	134316	126365	136305	134366		131140	4269.11	0.122926	0.650185	0.207243	0.771506	0.131692	0.886815	0.775038		1	1.05231	1.01165	1.06443	1.00142	1.08019	1.06482
Target_Invertiv_Fish2_Nums	105103	121787	109795	125508	106419	132211	126877		118243	10945.7	0.114975	0.626959	0.220105	0.746574	0.140022	0.899046	0.784902		1	1.15874	1.04464	1.19415	1.01252	1.25792	1.20718
Target_Invertiv_Fish3_Nums	88467.3	111622	91358	115961	90223.8	127882	118361		106268	15982.3	0.13269	0.631195	0.175437	0.727901	0.157723	0.911874	0.775366		1	1.26173	1.03268	1.31077	1.01985	1.44553	1.3379
Target_Invertiv_Fish4_Nums	75207.6	101880	75157.7	106407	76751.2	122639	109279		95331.7	19420.7	0.15005	0.632013	0.149451	0.715758	0.16935	0.920153	0.763673		1	1.35465	0.999336	1.41484	1.02052	1.63068	1.45303
Target_Invertiv_Fish5_Nums	64234.5	93473	61885.6	97958.4	65655.9	118354	101386		86135.3	22178.6	0.161705	0.62962	0.137113	0.703014	0.177903	0.926844	0.754155		1	1.45518	0.963432	1.52501	1.02213	1.84253	1.57837
Target_Invertiv_Fish6_Nums	54999.2	85858.1	50912.4	90174.3	56388.3	114991	94513.8		78262.4	24428	0.170467	0.622078	0.131438	0.687095	0.185272	0.93365	0.747064		1	1.56108	0.925695	1.63956	1.02526	2.09077	1.71846
Target_Invertiv_Fish7_Nums	47324.7	79306.3	41899.3	83454.2	48729.9	112163	88429.6		71615.3	26213.7	0.177058	0.615392	0.12848	0.674234	0.191323	0.939045	0.739379		1	1.67579	0.885357	1.76344	1.02969	2.37006	1.86857
Target_Invertiv_Fish8_Nums	40917.6	73542.3	34639	77525.3	42259	110045	82904.7		65976.1	27663.8	0.182514	0.607768	0.128652	0.661838	0.19563	0.944421	0.729711		1	1.79733	0.846556	1.89467	1.03278	2.68943	2.02614
Target_Invertiv_Fish9_Nums	35476.9	68366.2	28709.8	72111.8	36786.1	108923	78257.9		61233	29017.7	0.187378	0.597089	0.131185	0.646133	0.199758	0.949856	0.7213		1	1.92706	0.809253	2.03264	1.0369	3.07024	2.20588
Target_Invertiv_Fish10_Nums	30870.8	63775.6	23827.5	67310.8	32059.5	107756	73935		57076.4	30056.3	0.191636	0.588189	0.134316	0.633263	0.20261	0.954116	0.712568		1	2.06589	0.771847	2.1804	1.03851	3.49054	2.39498
Humphead_Fish1_Nums	53.1802	76.2151	22.9297	68.9996	56.1491	84.9811	74.1585		62.3733	20.6743	0.32828	0.748417	0.0282048	0.625709	0.381684	0.862918	0.715674		1	1.43315	0.43117	1.29747	1.05583	1.59799	1.39448
Humphead_Fish2_Nums	29.7817	42.2821	10.4256	35.8165	31.1291	47.5476	39.1557		33.734	11.9952	0.370891	0.761961	0.0259989	0.568915	0.414039	0.875256	0.674361		1	1.41973	0.350066	1.20264	1.04524	1.59654	1.31476
Humphead_Fish3_Nums	17.0456	30.1846	5.95984	25.8367	17.5194	38.2268	28.7549		23.3611	10.6426	0.276449	0.739287	0.0510178	0.591967	0.291538	0.918765	0.693858		1	1.77082	0.349642	1.51574	1.0278	2.24262	1.68694
Humphead_Fish4_Nums	10.6246	23.9727	3.53693	20.4354	10.8219	34.3331	23.256		18.1401	10.4161	0.235293	0.712247	0.0804598	0.587206	0.241155	0.939982	0.688341		1	2.25633	0.332899	1.9234	1.01856	3.23147	2.18887
Humphead_Fish5_Nums	6.62426	19.0652	2.10087	16.1814	6.6643	31.1113	18.7088		14.3509	9.95259	0.218774	0.682135	0.109192	0.572964	0.219963	0.953912	0.669259		1	2.87808	0.317148	2.44275	1.00604	4.69656	2.82428
Humphead_Fish6_Nums	4.12548	15.1404	1.25221	12.7663	4.1389	28.1621	15.0464		11.5188	9.29734	0.213245	0.651558	0.134742	0.553369	0.213665	0.963282	0.647809		1	3.66998	0.303532	3.09451	1.00325	6.82638	3.64717
Humphead_Fish7_Nums	2.57394	11.9685	0.746488	10.0646	2.58003	25.5735	12.0734		9.36864	8.59991	0.214738	0.618795	0.15803	0.53225	0.214945	0.970238	0.623433		1	4.64989	0.290017	3.91019	1.00237	9.93552	4.69062
Humphead_Fish8_Nums	1.62043	9.56606	0.449234	8.01456	1.61547	23.421	9.68559		7.76748	7.97077	0.220294	0.589262	0.179274	0.512364	0.22011	0.975227	0.595084		1	5.90339	0.27723	4.94593	0.996939	14.4536	5.97716
Humphead_Fish9_Nums	1.01922	7.59778	0.265373	6.33878	1.01376	21.5053	7.71347		6.49339	7.38096	0.229147	0.559471	0.199392	0.491644	0.228922	0.979018	0.565647		1	7.45449	0.260369	6.21924	0.994642	21.0998	7.568
Humphead_Fish10_Nums	0.631742	5.93454	0.150303	4.91096	0.629678	19.5714	6.03268		5.40875	6.76762	0.240137	0.530964	0.218579	0.470682	0.240042	0.981812	0.536728		1	9.39393	0.237918	7.77368	0.996732	30.98	9.54927
Detritiv_Fish1_Nums	44501.4	44482.4	44577.5	44471.3	45561.8	45065.1	45474.3		44876.3	485.149	0.219866	0.20843	0.269006	0.201933	0.921183	0.651486	0.891152		1	0.999572	1.00171	0.999323	1.02383	1.01267	1.02186
Detritiv_Fish2_Nums	39899.6	39885.8	39923.7	39861.8	41052	40532.8	40929.5		40297.9	529.384	0.225896	0.218186	0.239837	0.205018	0.922855	0.671402	0.883584		1	0.999656	1.00061	0.999053	1.02888	1.01587	1.02581
Detritiv_Fish3_Nums	39593.4	39562.7	39638.1	39545.1	40253.9	40243.4	40277.9		39873.5	361.339	0.219123	0.194827	0.257392	0.181721	0.853782	0.847009	0.868463		1	0.999223	1.00113	0.99878	1.01668	1.01642	1.01729
Detritiv_Fish4_Nums	39153.8	39074.5	39244.3	39069.4	38780.8	39263.7	38660		39035.2	230.309	0.696646	0.567755	0.818051	0.558991	0.134613	0.839456	0.0516364		1	0.997976	1.00231	0.997845	0.990473	1.00281	0.987389
Detritiv_Fish5_Nums	38592.9	38478.4	38732.7	38485	38204.8	37610.3	37938.7		38291.8	398.721	0.774897	0.680103	0.865561	0.68599	0.413606	0.0437022	0.187891		1	0.997034	1.00362	0.997205	0.989944	0.97454	0.983048
Detritiv_Fish6_Nums	38029.3	37874.9	38218	37889.4	37762.8	36975.3	37492.2		37748.8	408.027	0.754079	0.621318	0.874892	0.634755	0.513695	0.0289875	0.26465		1	0.99594	1.00496	0.996321	0.992993	0.972283	0.985875
Detritiv_Fish7_Nums	37449	37251	37686.2	37270.9	37365.1	36481.9	37046.4		37221.5	380.637	0.725016	0.530877	0.888921	0.551625	0.646973	0.026002	0.322788		1	0.994711	1.00633	0.995243	0.997757	0.974174	0.989249
Detritiv_Fish8_Nums	36816.2	36598.3	37094.9	36621	36847	35892.6	36489.5		36622.8	379.049	0.695037	0.474222	0.893521	0.498151	0.722931	0.0270316	0.362572		1	0.994082	1.00757	0.9947	1.00084	0.974914	0.991127
Detritiv_Fish9_Nums	36054.5	35796.6	36304.1	35823.2	36196.1	35173.3	35804.2		35878.8	370.942	0.682054	0.412243	0.874184	0.440341	0.803816	0.028582	0.420255		1	0.992847	1.00692	0.993585	1.00393	0.97556	0.993059
Detritiv_Fish10_Nums	35024.8	34737.7	35258.1	34766.7	35174.2	34086.8	34739.5		34826.8	390.022	0.69412	0.409605	0.865575	0.438777	0.813462	0.0288852	0.411404		1	0.991803	1.00666	0.992632	1.00427	0.973219	0.991854
Herb_Browser_Fish1_Nums	7452.71	7540.33	7301.64	7506.66	7425.85	7505.65	7430.96		7451.97	78.9551	0.50372	0.868453	0.0284538	0.75574	0.370372	0.751698	0.395101		1	1.01176	0.97973	1.00724	0.996396	1.0071	0.997083
Herb_Browser_Fish2_Nums	6556.28	6815.1	6095.82	6637.47	6453.34	6576.08	6380.39		6502.07	226.187	0.594704	0.916815	0.0362398	0.725296	0.41471	0.62825	0.295305		1	1.03948	0.929768	1.01238	0.984299	1.00302	0.973173
Herb_Browser_Fish3_Nums	5525.08	5856.89	5008.06	5727	5341.07	5653.23	5374.33		5497.95	284.614	0.537966	0.896369	0.0426034	0.789523	0.29075	0.707323	0.332016		1	1.06006	0.906424	1.03655	0.966696	1.02319	0.972715
Herb_Browser_Fish4_Nums	4358.65	4668.16	3893.79	4581.79	4163.41	4497.32	4230.97		4342.01	268.76	0.52468	0.887533	0.0476846	0.813848	0.253172	0.718324	0.339737		1	1.07101	0.893349	1.0512	0.955207	1.03182	0.970706
Herb_Browser_Fish5_Nums	3546.39	3804.94	3113.26	3735.88	3357.9	3696.71	3431.41		3526.64	244.6	0.53218	0.872395	0.04551	0.803841	0.245139	0.756565	0.348511		1	1.07291	0.877866	1.05343	0.946849	1.04239	0.967577
Herb_Browser_Fish6_Nums	2924.36	3136.87	2521.38	3097.23	2757.58	3102.2	2835.68		2910.75	224.888	0.524119	0.842656	0.0416879	0.7965	0.247897	0.802693	0.369249		1	1.07267	0.862198	1.05911	0.942968	1.06081	0.969675
Herb_Browser_Fish7_Nums	2446.13	2624.41	2064.38	2594.82	2298.08	2649.74	2380.37		2436.85	210.842	0.517563	0.81316	0.0386485	0.77315	0.255217	0.843683	0.394403		1	1.07288	0.843935	1.06079	0.939475	1.08323	0.973116
Herb_Browser_Fish8_Nums	2069.64	2222.82	1704.99	2200.5	1941.06	2288.19	2017.65		2063.55	200.125	0.512148	0.786943	0.0365916	0.753107	0.270246	0.869177	0.409291		1	1.07401	0.823807	1.06322	0.937871	1.1056	0.974876
Herb_Browser_Fish9_Nums	1766.88	1897.02	1412.24	1879.23	1650.33	1987.19	1721.89		1759.25	191.08	0.515923	0.764539	0.0346781	0.73496	0.284328	0.883544	0.422481		1	1.07365	0.799281	1.06359	0.934036	1.12469	0.974535
Herb_Browser_Fish10_Nums	1506.59	1630.37	1185.35	1616.18	1414.17	1740.71	1475.14		1509.79	180.184	0.492918	0.748313	0.0358833	0.722562	0.297832	0.90001	0.423765		1	1.08216	0.786778	1.07274	0.93866	1.1554	0.979128
Target_Browser_Fish1_Num	21044.9	24307.9	14123.2	22910.9	21067.8	26830.7	22712.8		21856.9	3951.41	0.418598	0.732469	0.0251619	0.605166	0.420855	0.895937	0.585747		1	1.15505	0.671096	1.08867	1.00108	1.27492	1.07925
Target_Browser_Fish2_Num	17503.7	21624	7228.27	17302.2	17350.7	24870.1	16817.1		17528	5436.87	0.498215	0.774388	0.0290841	0.483437	0.486992	0.911561	0.447983		1	1.2354	0.412957	0.98849	0.99126	1.42085	0.960774
Target_Browser_Fish3_Num	10756	15986.6	3497.61	12502.4	10674.3	22376.5	12064.6		12551.1	5734.26	0.377118	0.725448	0.0571855	0.496608	0.37172	0.956685	0.466193		1	1.4863	0.325179	1.16237	0.992408	2.08038	1.12167
Target_Browser_Fish4_Num	6315.69	10998.5	1662.68	8513.89	6291.26	17909.8	8182.49		8553.47	5021.06	0.327915	0.686853	0.084973	0.496855	0.326159	0.968798	0.470551		1	1.74145	0.263261	1.34805	0.996133	2.83576	1.29558
Target_Browser_Fish5_Num	3829.43	7862.66	799.461	5987.32	3829.33	14860.4	5729.75		6128.34	4442.29	0.302401	0.651884	0.115151	0.487338	0.302394	0.975332	0.464252		1	2.05322	0.208768	1.5635	0.999975	3.88059	1.49624
Target_Browser_Fish6_Num	2363.34	5764	385.991	4298.65	2373.18	12636.6	4095.35		4559.59	3958.02	0.289486	0.619549	0.145835	0.473718	0.290337	0.979358	0.453315		1	2.43892	0.163324	1.81889	1.00416	5.34693	1.73287
Target_Browser_Fish7_Num	1474.35	4302.32	186.597	3125.67	1486.83	10957	2965.47		3499.75	3554.61	0.284408	0.589314	0.17565	0.458093	0.2856	0.982044	0.440261		1	2.91811	0.126562	2.12003	1.00846	7.43177	2.01137
Target_Browser_Fish8_Num	925.996	3245.98	90.2267	2292.86	938.267	9641.36	2168.8		2757.64	3213.69	0.284356	0.560389	0.203265	0.442504	0.285652	0.983903	0.427309		1	3.5054	0.0974375	2.47611	1.01325	10.4119	2.34212
Target_Browser_Fish9_Num	583.67	2465.56	43.6146	1694.38	593.538	8557.25	1596.82		2219.26	2913.91	0.287295	0.53368	0.22764	0.428525	0.28845	0.985188	0.415425		1	4.22423	0.0747249	2.90298	1.01691	14.6611	2.73582
Target_Browser_Fish10_Num	368.771	1884.05	21.0797	1258.38	376.303	7682.81	1179.65		1824.43	2662.34	0.292272	0.508932	0.24909	0.415813	0.293244	0.986113	0.404318		1	5.109	0.0571621	3.41236	1.02043	20.8336	3.19888
Herb_Graz_Fish1_Nums	490203	491166	490197	490933	481637	481342	482396		486839	4744.95	0.760791	0.819072	0.760417	0.805894	0.136484	0.123339	0.174512		1	1.00196	0.999988	1.00149	0.982527	0.981925	0.984074
Herb_Graz_Fish2_Nums	242005	243160	242527	243173	237571	237575	238456		240638	2638.68	0.697765	0.830392	0.762912	0.83169	0.122522	0.122831	0.204163		1	1.00477	1.00216	1.00483	0.981677	0.981694	0.985337
Herb_Graz_Fish3_Nums	231702	234047	233035	234211	227874	227645	229536		231150	2806.06	0.577974	0.849033	0.749189	0.862337	0.121477	0.105841	0.282567		1	1.01012	1.00576	1.01083	0.983477	0.982492	0.990651
Herb_Graz_Fish4_Nums	225396	228799	227397	229108	221814	221525	224297		225476	3118.23	0.489648	0.856707	0.731008	0.87788	0.120056	0.102562	0.352635		1	1.0151	1.00888	1.01647	0.984108	0.98283	0.995127
Herb_Graz_Fish5_Nums	219871	223933	222271	224360	216547	216016	219592		220370	3333.09	0.440457	0.857483	0.715744	0.884371	0.125687	0.0957387	0.407727		1	1.01848	1.01092	1.02042	0.984883	0.98247	0.998733
Herb_Graz_Fish6_Nums	215060	219625	217824	220150	211946	211299	215587		215927	3493.92	0.401976	0.855041	0.70643	0.886594	0.127239	0.0926405	0.461182		1	1.02123	1.01285	1.02367	0.98552	0.982512	1.00245
Herb_Graz_Fish7_Nums	210557	215665	213796	216289	207670	206811	211738		211789	3709.47	0.36985	0.851951	0.705715	0.887415	0.133405	0.0897983	0.494432		1	1.02426	1.01538	1.02722	0.98629	0.982211	1.00561
Herb_Graz_Fish8_Nums	205182	210690	208674	211382	202670	201621	207124		206763	3791.12	0.338318	0.849871	0.692873	0.888436	0.140131	0.0874762	0.537883		1	1.02685	1.01702	1.03022	0.987756	0.982643	1.00946
Herb_Graz_Fish9_Nums	201277	207059	205145	207801	199093	197877	203941		203170	3857.76	0.311737	0.84328	0.695657	0.884986	0.145245	0.0850089	0.579206		1	1.02873	1.01922	1.03241	0.98915	0.98311	1.01324
Herb_Graz_Fish10_Nums	198003	203995	202367	204771	196065	194768	201280		200178	3928.35	0.289886	0.834364	0.71127	0.878827	0.147531	0.0841947	0.610414		1	1.03026	1.02204	1.03418	0.990212	0.983658	1.01655
Targ_Graz_Fish1_Nums	166456	166615	159538	163635	165456	164748	162486		164134	2508.66	0.822706	0.83873	0.0334875	0.421233	0.700994	0.596781	0.255693		1	1.00096	0.958441	0.983053	0.993995	0.989741	0.976151
Targ_Graz_Fish2_Nums	110767	112554	102684	109938	109572	112914	108528		109565	3419.5	0.637337	0.808984	0.0220905	0.543382	0.500742	0.836275	0.380861		1	1.01614	0.927029	0.992517	0.989211	1.01938	0.979793
Targ_Graz_Fish3_Nums	97343.6	101988	87681.1	100150	95970.5	106499	98377.7		98287	5821.61	0.435631	0.737503	0.0342416	0.625502	0.345346	0.920814	0.506218		1	1.04771	0.900738	1.02883	0.985894	1.09405	1.01062
Targ_Graz_Fish4_Nums	85994.9	92835.4	75111	91491.4	84655.1	100890	89524.6		88643.3	7984.32	0.370061	0.700225	0.0450515	0.639349	0.308712	0.937472	0.543949		1	1.07955	0.873435	1.06392	0.984419	1.17321	1.04105
Targ_Graz_Fish5_Nums	76362.8	84693.2	64532.8	83659.1	74957.4	95779.9	81747.8		80247.6	9703.42	0.344448	0.676577	0.0526691	0.637424	0.292812	0.945279	0.561435		1	1.10909	0.845082	1.09555	0.981596	1.25427	1.07052
Targ_Graz_Fish6_Nums	68059.6	77473.2	55562.5	76679.5	66571	91083.1	74732.7		72880.2	11054.8	0.331395	0.661103	0.058612	0.634453	0.284095	0.95018	0.566539		1	1.13831	0.81638	1.12665	0.978129	1.33828	1.09805
Targ_Graz_Fish7_Nums	60850.9	71253.1	48045.8	70657.4	59480.8	87080	68560		66561.1	12174.9	0.319528	0.650022	0.0641576	0.631735	0.280434	0.954039	0.565205		1	1.17095	0.789567	1.16116	0.977484	1.43104	1.12669
Targ_Graz_Fish8_Nums	54391.6	65296	41460.4	64846.9	53035.3	83006.2	62912.4		60707	12971	0.313171	0.638252	0.0689293	0.6252	0.27711	0.957207	0.567507		1	1.20048	0.762257	1.19222	0.975063	1.52608	1.15666
Targ_Graz_Fish9_Nums	48789.7	60133.2	35847.5	59790.9	47595.9	79639	58071.8		55695.4	13678.7	0.306832	0.627192	0.0733885	0.617684	0.276883	0.959978	0.56896		1	1.2325	0.734734	1.22548	0.975531	1.63229	1.19025
Targ_Graz_Fish10_Nums	44122.8	55832.2	31277.6	55574.6	43152.2	77084.2	54100.2		51592	14315.9	0.300925	0.616457	0.0779493	0.60957	0.27775	0.962518	0.569542		1	1.26538	0.708878	1.25955	0.978003	1.74704	1.22613
Herb_Scrap_Fish1_Nums	492643	493611	491829	493108	495135	496785	495375		494069	1751.28	0.207747	0.39673	0.100414	0.291461	0.728469	0.939527	0.771983		1	1.00196	0.998347	1.00094	1.00506	1.00841	1.00554
Herb_Scrap_Fish2_Nums	483497	486380	480107	484521	487242	490963	487578		485755	3453.76	0.256564	0.571724	0.0509724	0.360425	0.666595	0.934186	0.701177		1	1.00596	0.992989	1.00212	1.00775	1.01544	1.00844
Herb_Scrap_Fish3_Nums	431549	436601	428895	435509	435201	443195	438203		435593	4600.77	0.18971	0.586662	0.0726988	0.492671	0.466047	0.950768	0.714715		1	1.01171	0.993848	1.00917	1.00846	1.02699	1.01542
Herb_Scrap_Fish4_Nums	351653	356842	349371	356322	354356	363331	358051		355704	4540.14	0.18616	0.598991	0.0815364	0.554182	0.383309	0.953505	0.697401		1	1.01476	0.99351	1.01328	1.00769	1.03321	1.01819
Herb_Scrap_Fish5_Nums	296036	301233	293835	301026	297955	307574	302057		299959	4510.5	0.192197	0.61118	0.0872536	0.593439	0.328379	0.95432	0.679042		1	1.01756	0.992564	1.01685	1.00648	1.03898	1.02034
Herb_Scrap_Fish6_Nums	255074	260159	252809	260051	256494	266506	260853		258849	4511.02	0.201286	0.614181	0.0902718	0.60505	0.300779	0.955184	0.671573		1	1.01994	0.991121	1.01952	1.00557	1.04482	1.02266
Herb_Scrap_Fish7_Nums	223599	228609	221251	228569	224694	234893	229113		227247	4496.89	0.20861	0.619056	0.0912155	0.615644	0.285089	0.955472	0.660886		1	1.02241	0.989501	1.02223	1.0049	1.05051	1.02466
Herb_Scrap_Fish8_Nums	198633	198633	198633	198633	198633	198633	203912		199387	1995.22	0.352728	0.352728	0.352728	0.352728	0.352728	0.352728	0.988329		1	1	1	1	1	1	1.02658
Herb_Scrap_Fish9_Nums	178344	178344	178344	178344	178344	178344	183428		179070	1921.74	0.352728	0.352728	0.352728	0.352728	0.352728	0.352728	0.988329		1	1	1	1	1	1	1.02851
Herb_Scrap_Fish10_Nums	161545	161545	161545	161545	161545	161545	166418		162241	1841.71	0.352728	0.352728	0.352728	0.352728	0.352728	0.352728	0.988329		1	1	1	1	1	1	1.03016
Herb_Excav_Fish1_Nums	17656.1	17656.1	17656.1	17656.1	17656.1	17656.1	17925.4		17694.6	101.797	0.352728	0.352728	0.352728	0.352728	0.352728	0.352728	0.988329		1	1	1	1	1	1	1.01525
Herb_Excav_Fish2_Nums	16623.3	16623.3	16623.3	16623.3	16623.3	16623.3	16841.7		16654.5	82.532	0.352728	0.352728	0.352728	0.352728	0.352728	0.352728	0.988329		1	1	1	1	1	1	1.01314
Herb_Excav_Fish3_Nums	14961.7	14961.7	14961.7	14961.7	14961.7	14961.7	15792.5		15080.4	314.019	0.352728	0.352728	0.352728	0.352728	0.352728	0.352728	0.988329		1	1	1	1	1	1	1.05553
Herb_Excav_Fish4_Nums	13675	13675	13675	13675	13675	13675	14705.1		13822.2	389.341	0.352728	0.352728	0.352728	0.352728	0.352728	0.352728	0.988329		1	1	1	1	1	1	1.07533
Herb_Excav_Fish5_Nums	12537.9	12537.9	12537.9	12537.9	12537.9	12537.9	13729.3		12708.1	450.295	0.352728	0.352728	0.352728	0.352728	0.352728	0.352728	0.988329		1	1	1	1	1	1	1.09502
Herb_Excav_Fish6_Nums	11508.9	11508.9	11508.9	11508.9	11508.9	11508.9	12830.8		11697.7	499.642	0.352728	0.352728	0.352728	0.352728	0.352728	0.352728	0.988329		1	1	1	1	1	1	1.11486
Herb_Excav_Fish7_Nums	10576.9	10576.9	10576.9	10576.9	10576.9	10576.9	11999.5		10780.2	537.691	0.352728	0.352728	0.352728	0.352728	0.352728	0.352728	0.988329		1	1	1	1	1	1	1.1345
Herb_Excav_Fish8_Nums	9728.5	9728.5	9728.5	9728.5	9728.5	9728.5	11232.4		9943.34	568.429	0.352728	0.352728	0.352728	0.352728	0.352728	0.352728	0.988329		1	1	1	1	1	1	1.15459
Herb_Excav_Fish9_Nums	8952.55	8952.55	8952.55	8952.55	8952.55	8952.55	10517.6		9176.13	591.53	0.352728	0.352728	0.352728	0.352728	0.352728	0.352728	0.988329		1	1	1	1	1	1	1.17482
Herb_Excav_Fish10_Nums	8244.16	8244.16	8244.16	8244.16	8244.16	8244.16	9859.06		8474.86	610.376	0.352728	0.352728	0.352728	0.352728	0.352728	0.352728	0.988329		1	1	1	1	1	1	1.19588
BHParrot_Fish1_Nums	0.344249	11.6895	4.07412e-07	3.56003	0.324528	213.774	5.52722		33.6029	79.5566	0.337955	0.391488	0.336375	0.352853	0.337865	0.988234	0.362081		1	33.9566	1.18348e-06	10.3415	0.942714	620.989	16.0559
BHParrot_Fish2_Nums	0.197992	8.13777	9.2594e-06	2.04348	0.274134	127.759	3.17945		20.2273	47.5024	0.33664	0.399553	0.335121	0.350934	0.337226	0.988204	0.359841		1	41.1014	4.67664e-05	10.321	1.38457	645.271	16.0584
BHParrot_Fish3_Nums	0.0857402	4.97526	1.90431e-05	1.40297	0.102016	94.4139	2.17636		14.7366	35.1788	0.338534	0.390706	0.337643	0.352335	0.338703	0.988241	0.360531		1	58.0272	0.000222102	16.363	1.18983	1101.16	25.3832
BHParrot_Fish4_Nums	0.103218	3.21086	2.98853e-05	1.02366	0.0821014	75.0844	1.60225		11.5866	28.0234	0.340984	0.382514	0.339634	0.353111	0.340707	0.988271	0.360812		1	31.1077	0.000289536	9.91751	0.795419	727.437	15.523
BHParrot_Fish5_Nums	0.0347634	2.04459	4.8147e-05	0.747297	0.0518767	60.1549	1.17916		9.17324	22.4934	0.342271	0.375651	0.341704	0.35398	0.34255	0.98829	0.361146		1	58.8146	0.00138499	21.4967	1.49228	1730.41	33.9196
BHParrot_Fish6_Nums	0.0187611	1.3301	7.46976e-05	0.544562	0.0192147	48.3222	0.869903		7.30069	18.0959	0.343692	0.370722	0.343312	0.354443	0.343701	0.988302	0.361155		1	70.8971	0.00398152	29.0262	1.02418	2575.67	46.3674
BHParrot_Fish7_Nums	0.0346967	0.862305	0.000121965	0.395332	0.0381415	38.4921	0.648305		5.78157	14.4278	0.345198	0.366568	0.344315	0.354454	0.345286	0.98831	0.360999		1	24.8527	0.00351519	11.394	1.09928	1109.39	18.6849
BHParrot_Fish8_Nums	0.0505528	0.561158	0.00034483	0.287938	0.0555426	30.1542	0.475285		4.51215	11.3092	0.346602	0.363409	0.344965	0.354381	0.346765	0.988316	0.360563		1	11.1005	0.00682119	5.69579	1.09871	596.49	9.40177
BHParrot_Fish9_Nums	0.0117024	0.382467	0.0016649	0.211004	0.0124913	23.3295	0.343468		3.47033	8.75856	0.346464	0.362211	0.346041	0.354898	0.346497	0.988317	0.360543		1	32.6828	0.14227	18.0308	1.06742	1993.57	29.3502
BHParrot_Fish10_Nums	0.00749219	0.264437	0.00305167	0.150883	0.0078978	17.8344	0.245257		2.64478	6.69895	0.346906	0.361171	0.346662	0.354842	0.346929	0.988319	0.360099		1	35.2949	0.407313	20.1387	1.05414	2380.4	32.735
Pisciv_B_Fish1_Nums	6727.02	6754.65	6652.41	6728.08	6755.35	6845.73	6771.52		6747.82	57.9871	0.359885	0.546869	0.0499505	0.366754	0.55165	0.954329	0.658589		1	1.00411	0.98891	1.00016	1.00421	1.01765	1.00661
Pisciv_B_Fish2_Nums	6243.85	6283.08	6044.82	6205.33	6274.46	6419.95	6249.86		6245.91	111.498	0.492652	0.630566	0.0356545	0.35797	0.601049	0.940736	0.514126		1	1.00628	0.968123	0.993831	1.0049	1.0282	1.00096
Pisciv_B_Fish3_Nums	5553.81	5645.46	5401	5647.16	5588.35	6005.36	5718.46		5651.37	185.309	0.299276	0.487285	0.0883318	0.490927	0.366897	0.97195	0.641334		1	1.0165	0.972486	1.01681	1.00622	1.0813	1.02965
Pisciv_B_Fish4_Nums	4951.39	5068.79	4783.39	5102.51	4989.85	5601.95	5206.38		5100.61	257.78	0.281343	0.450886	0.109241	0.502943	0.333721	0.974102	0.65921		1	1.02371	0.96607	1.03052	1.00777	1.13139	1.0515
Pisciv_B_Fish5_Nums	4488.79	4626.01	4274.59	4669.33	4521.76	5318.88	4804.7		4672.01	329.711	0.289211	0.444524	0.114033	0.496764	0.3243	0.975114	0.656325		1	1.03057	0.952281	1.04022	1.00734	1.18492	1.07038
Pisciv_B_Fish6_Nums	4101.98	4258.75	3841.18	4302.22	4129.86	5098.47	4465.48		4313.99	396.643	0.296495	0.44462	0.116623	0.488162	0.32124	0.976024	0.648742		1	1.03822	0.93642	1.04881	1.0068	1.24293	1.08862
Pisciv_B_Fish7_Nums	3787.97	3968.32	3485.42	4008.89	3823.36	4965.53	4201.11		4034.37	466.628	0.298736	0.443719	0.119712	0.478221	0.325563	0.977006	0.639578		1	1.04761	0.920128	1.05832	1.00934	1.31087	1.10907
Pisciv_B_Fish8_Nums	3522.79	3725.2	3176.1	3764.73	3549.29	4867	3970.19		3796.47	532.785	0.303736	0.44679	0.122133	0.476246	0.321346	0.977748	0.627808		1	1.05746	0.901588	1.06868	1.00752	1.38158	1.127
Pisciv_B_Fish9_Nums	3272.61	3501.35	2891.04	3534.44	3292.81	4769.42	3751.38		3573.29	592.125	0.305799	0.451646	0.124617	0.473839	0.31786	0.978311	0.618203		1	1.06989	0.883403	1.08	1.00617	1.45737	1.1463
Pisciv_B_Fish10_Nums	3041.43	3278.77	2629.28	3306.26	3066.47	4679.22	3555.87		3365.33	646.735	0.308246	0.446766	0.127538	0.463615	0.322006	0.978902	0.615858		1	1.07804	0.864488	1.08708	1.00824	1.5385	1.16915
Targ_Bent_Fish1_Nums	43761.9	43368.7	42189.9	42194.6	43387.3	43539.1	41943.6		42912.2	766.369	0.866248	0.724316	0.172996	0.174542	0.732362	0.793334	0.103152		1	0.991014	0.964079	0.964184	0.991439	0.994908	0.95845
Targ_Bent_Fish2_Nums	28415.2	27891.1	26904.1	26843	28119.4	28438.1	26703.6		27616.4	772.474	0.849466	0.638924	0.178257	0.158388	0.742535	0.856286	0.118691		1	0.981553	0.946821	0.944671	0.989589	1.00081	0.939766
Targ_Bent_Fish3_Nums	23207.4	22425.3	21839.5	21723.6	22989.6	24098.9	21717.5		22571.7	905.311	0.758712	0.435779	0.209317	0.174445	0.67782	0.954195	0.172706		1	0.966302	0.941058	0.936067	0.990616	1.03842	0.935802
Targ_Bent_Fish4_Nums	20631.9	19599.9	19186.3	19033.5	20517.2	22267.4	19188.2		20060.6	1168.87	0.687477	0.346724	0.227233	0.189764	0.651957	0.970485	0.227726		1	0.949981	0.929936	0.922528	0.994442	1.07927	0.930029
Targ_Bent_Fish5_Nums	18455.6	17254.2	16946.2	16786.6	18394.6	20655.5	17037.8		17932.9	1381.33	0.647417	0.311576	0.237508	0.203312	0.630887	0.975639	0.258496		1	0.934903	0.918216	0.909571	0.996695	1.1192	0.923182
Targ_Bent_Fish6_Nums	16588.2	15272	15031.7	14881.4	16555.7	19222.1	15196.1		16106.7	1545	0.622331	0.294495	0.243277	0.213856	0.614321	0.978122	0.277791		1	0.920654	0.906171	0.897108	0.998043	1.15878	0.91608
Targ_Bent_Fish7_Nums	14974	13595.9	13399.7	13267.6	14968.8	17967.5	13624.5		14542.6	1671.77	0.601828	0.2856	0.247115	0.222834	0.600615	0.979754	0.29144		1	0.907964	0.894867	0.88604	0.999649	1.19991	0.909873
Targ_Bent_Fish8_Nums	13537.5	12136.1	11966.5	11860	13557.2	16818.2	12247.8		13160.5	1764.35	0.584612	0.280759	0.249291	0.230538	0.588954	0.98092	0.302474		1	0.896479	0.88395	0.876084	1.00145	1.24234	0.904728
Targ_Bent_Fish9_Nums	12236.1	10847.3	10683.4	10617.3	12272.2	15738.9	11019.8		11916.4	1825.53	0.569513	0.279054	0.249698	0.238337	0.577255	0.981866	0.311657		1	0.886497	0.873102	0.867698	1.00295	1.28626	0.900595
Targ_Bent_Fish10_Nums	11133.4	9775.52	9601.72	9585	11193.9	14850.9	10006.1		10878.1	1880.84	0.553996	0.278868	0.248691	0.245883	0.566681	0.982668	0.321459		1	0.878033	0.862422	0.860921	1.00543	1.3339	0.898742
Pisciv_M_Fish1_Nums	20804.2	19642.1	20384.4	19434.5	21300.7	20953.9	20795.4		20473.6	696.031	0.682618	0.11611	0.449035	0.0677305	0.882647	0.754906	0.678069		1	0.944138	0.979821	0.93416	1.02386	1.00719	0.999574
Pisciv_M_Fish2_Nums	19182.7	17817.4	17604.1	16889.2	19752.7	19879.9	18831.4		18565.3	1146.2	0.704913	0.257025	0.200825	0.0718277	0.84988	0.874287	0.591787		1	0.928828	0.917706	0.880443	1.02972	1.03635	0.98169
Pisciv_M_Fish3_Nums	14508.8	12777.3	13141	12528.2	15222.5	15927.1	14650.7		14108	1304.36	0.6207	0.153834	0.229247	0.112919	0.803585	0.918444	0.661334		1	0.88066	0.905725	0.863488	1.04919	1.09776	1.00978
Pisciv_M_Fish4_Nums	9199.45	7803.99	8505.59	7800.83	10128.1	10297.8	9602.63		9048.35	1037.34	0.557906	0.115154	0.300412	0.114563	0.851044	0.885797	0.703445		1	0.84831	0.924577	0.847967	1.10095	1.11939	1.04383
Pisciv_M_Fish5_Nums	6705.62	5117.59	6150.36	5175.52	7641.49	7413.93	6947.74		6450.32	1012.53	0.599533	0.0940465	0.383521	0.104011	0.880289	0.829371	0.688379		1	0.763179	0.917195	0.771818	1.13957	1.10563	1.03611
Pisciv_M_Fish6_Nums	5411.94	3501.61	4770.47	3567.51	6295.54	5695.73	5329.29		4938.87	1061.78	0.672036	0.0879281	0.436992	0.0982541	0.899328	0.76202	0.643453		1	0.647016	0.881472	0.659192	1.16327	1.05244	0.984729
Pisciv_M_Fish7_Nums	4488.15	2422.99	3764.05	2480.16	5301.58	4442.12	4145.88		3863.56	1070.15	0.72027	0.0891297	0.462956	0.0980556	0.910485	0.705619	0.604038		1	0.539864	0.838664	0.552602	1.18124	0.989744	0.92374
Pisciv_M_Fish8_Nums	3703.23	1690.95	2965.82	1729.05	4467.9	3472.31	3232.65		3037.41	1020.36	0.742971	0.0934843	0.47203	0.0998748	0.919535	0.665025	0.57587		1	0.456616	0.800874	0.466903	1.20649	0.937643	0.872927
Pisciv_M_Fish9_Nums	3095.35	1194.09	2345.35	1214.08	3768.15	2722.18	2528.35		2409.65	943.273	0.766367	0.0987581	0.472824	0.102494	0.925095	0.6298	0.550072		1	0.38577	0.7577	0.392228	1.21736	0.879442	0.816824
Pisciv_M_Fish10_Nums	2593.97	853.424	1855.94	861.048	3191.82	2139.07	1984.66		1925.71	855.062	0.782757	0.104914	0.467488	0.106543	0.930661	0.598523	0.527486		1	0.329003	0.715484	0.331942	1.23048	0.82463	0.765106
Pisciv_R_Fish1_Nums	11583.9	11402.7	11313.4	11416.9	11803.7	12513.2	12018.1		11721.7	428.452	0.373848	0.228278	0.170309	0.23843	0.575888	0.967657	0.755441		1	0.98436	0.976651	0.985587	1.01898	1.08023	1.03748
Pisciv_R_Fish2_Nums	2522.06	2414.57	2476.31	2419.14	2553.17	2652.72	2556.19		2513.45	84.5811	0.540541	0.121192	0.330289	0.132419	0.680682	0.950171	0.693316		1	0.95738	0.98186	0.959192	1.01233	1.0518	1.01353
Pisciv_R_Fish3_Nums	1511.23	1396.6	1459.48	1401.14	1540.5	1682.72	1549.55		1505.89	99.5598	0.521383	0.136167	0.320552	0.146372	0.635953	0.962147	0.669499		1	0.924151	0.965757	0.927153	1.01937	1.11348	1.02536
Pisciv_R_Fish4_Nums	1121.92	990.702	1046.4	996.033	1154.91	1408.83	1185.09		1129.13	144.801	0.480149	0.169546	0.283893	0.179009	0.570649	0.9733	0.650442		1	0.883043	0.932687	0.887794	1.0294	1.25574	1.05631
Pisciv_R_Fish5_Nums	851.23	730.954	763.643	736.108	880.593	1224.78	932.261		874.224	172.558	0.446997	0.203192	0.260815	0.211738	0.514721	0.978899	0.63169		1	0.858703	0.897105	0.864757	1.03449	1.43883	1.09519
Pisciv_R_Fish6_Nums	653.235	559.046	563.108	563.721	678.083	1089.38	751.093		693.952	188.777	0.414614	0.237417	0.244117	0.245138	0.466502	0.981901	0.618936		1	0.855811	0.86203	0.862968	1.03804	1.66767	1.14981
Pisciv_R_Fish7_Nums	490.964	430.145	407.18	434.071	512.14	953.667	601.836		547.143	190.918	0.384281	0.269998	0.231745	0.27684	0.427265	0.983386	0.612742		1	0.876123	0.829346	0.88412	1.04313	1.94244	1.22582
Pisciv_R_Fish8_Nums	375.451	347.211	299.514	350.496	393.59	855.491	499.437		445.884	190.875	0.356064	0.302595	0.221589	0.308628	0.392054	0.984061	0.610477		1	0.924784	0.797744	0.933533	1.04831	2.27857	1.33023
Pisciv_R_Fish9_Nums	283.125	285.941	216.492	288.758	297.194	771.472	418.356		365.905	188.627	0.330381	0.335809	0.214147	0.341272	0.357828	0.984227	0.609518		1	1.00995	0.764652	1.0199	1.04969	2.72485	1.47764
Pisciv_R_Fish10_Nums	210.906	241.47	153.908	243.942	221.246	710.383	355.434		305.327	188.565	0.308279	0.367438	0.210984	0.372386	0.327834	0.984147	0.604776		1	1.14492	0.729744	1.15664	1.04902	3.36824	1.68527
Ray1_Nums	770.75	769.239	768.334	768.827	771.014	777.281	769.933		770.768	3.0334	0.497577	0.307079	0.211168	0.261058	0.532217	0.984107	0.391564		1	0.99804	0.996866	0.997505	1.00034	1.00847	0.998941
Ray2_Nums	450.864	450.284	449.494	449.821	450.961	453.32	450.244		450.713	1.26278	0.54771	0.367021	0.167194	0.240142	0.577996	0.980536	0.355435		1	0.998713	0.996961	0.997687	1.00022	1.00545	0.998626
Ray3_Nums	318.202	317.934	317.402	317.711	318.256	319.987	317.965		318.208	0.836561	0.497136	0.371363	0.167622	0.276285	0.522881	0.983278	0.385469		1	0.999156	0.997486	0.998457	1.00017	1.00561	0.999253
Ray4_Nums	245.755	245.61	245.176	245.479	245.792	247.271	245.666		245.821	0.67195	0.46092	0.37626	0.168471	0.305248	0.482788	0.984511	0.408591		1	0.999406	0.997643	0.998876	1.00015	1.00617	0.999636
Ray5_Nums	200.089	200.004	199.62	199.919	200.118	201.47	200.073		200.185	0.591764	0.435898	0.380049	0.16973	0.326919	0.4549	0.985082	0.425211		1	0.999574	0.997652	0.999151	1.00014	1.0069	0.99992
Ray6_Nums	178.39	178.279	177.946	178.214	178.422	179.77	178.378		178.486	0.589127	0.435802	0.362612	0.179843	0.322545	0.457194	0.985386	0.427315		1	0.999373	0.997509	0.999013	1.00018	1.00773	0.999929
Ray7_Nums	177.845	177.595	177.347	177.537	177.895	179.378	177.759		177.908	0.675426	0.4628	0.321563	0.203063	0.291307	0.492606	0.985227	0.412717		1	0.998595	0.9972	0.998267	1.00028	1.00862	0.999517
Ray8_Nums	177.242	176.86	176.691	176.806	177.31	178.931	177.089		177.276	0.76525	0.482574	0.293399	0.222305	0.269856	0.518146	0.984748	0.40357		1	0.997842	0.996888	0.997541	1.00039	1.00953	0.999135
Ray9_Nums	176.507	175.999	175.901	175.95	176.591	178.353	176.287		176.513	0.856171	0.497387	0.274261	0.237589	0.255673	0.536569	0.984205	0.395887		1	0.997122	0.996568	0.996846	1.00048	1.01046	0.998751
Ray10_Nums	175.802	175.172	175.141	175.127	175.9	177.807	175.516		175.781	0.948571	0.509031	0.260518	0.249885	0.245369	0.550064	0.983671	0.390125		1	0.996415	0.996237	0.99616	1.00056	1.0114	0.998372
Shark_R1_Nums	142.704	283.046	74.9322	272.445	142.856	369.601	285.537		224.446	105.066	0.218283	0.71149	0.0773612	0.676109	0.218709	0.916447	0.719535		1	1.98344	0.525088	1.90916	1.00106	2.58998	2.0009
Shark_R2_Nums	60.8057	98.3898	33.6334	94.9234	60.8449	114.716	98.0187		80.1903	28.7974	0.25043	0.736301	0.0529709	0.695538	0.250863	0.884723	0.732074		1	1.6181	0.553129	1.56109	1.00064	1.88661	1.612
Shark_R3_Nums	32.8132	60.757	18.709	59.2796	32.845	74.5302	61.6525		48.6552	20.3939	0.218639	0.723544	0.0709996	0.698801	0.219099	0.897736	0.738038		1	1.8516	0.570167	1.80657	1.00097	2.27134	1.87889
Shark_R4_Nums	22.3173	54.4231	11.8857	53.1358	22.3569	74.1951	56.2352		42.0784	23.0853	0.195998	0.703585	0.0954577	0.684023	0.196472	0.91792	0.73014		1	2.4386	0.532578	2.38092	1.00177	3.32455	2.5198
Shark_R5_Nums	15.1883	48.7994	7.56844	47.6427	15.2257	73.7751	51.2384		37.0626	24.5754	0.186709	0.683527	0.11504	0.66659	0.187118	0.932396	0.717973		1	3.21295	0.498306	3.13679	1.00246	4.85735	3.37354
Shark_R6_Nums	10.3495	43.7672	4.83343	42.7074	10.3809	73.2763	46.6199		33.1335	25.2842	0.183763	0.662964	0.13151	0.647526	0.184094	0.943819	0.703118		1	4.22891	0.46702	4.12651	1.00304	7.08017	4.50455
Shark_R7_Nums	7.07419	39.3672	3.10564	38.5353	7.09892	72.9083	42.6497		30.1056	25.6093	0.184236	0.641193	0.145872	0.628985	0.184493	0.952676	0.687871		1	5.56491	0.439009	5.44731	1.0035	10.3062	6.02891
Shark_R8_Nums	4.85093	35.5494	2.00097	34.7133	4.86975	72.7475	38.9028		27.6621	25.7207	0.187571	0.620446	0.159216	0.608013	0.187769	0.960189	0.668956		1	7.32836	0.412492	7.156	1.00388	14.9966	8.01966
Shark_R9_Nums	3.30562	31.6217	1.29065	30.8898	3.31962	71.2098	35.0042		25.2345	25.2204	0.19229	0.599965	0.171212	0.588713	0.192441	0.965844	0.65076		1	9.56604	0.390441	9.34463	1.00423	21.542	10.5893
Shark_R10_Nums	2.28975	28.7054	0.850566	28.2175	2.30037	71.0141	32.293		23.6672	25.1541	0.197701	0.579374	0.182183	0.571776	0.197818	0.970101	0.63417		1	12.5365	0.371467	12.3234	1.00464	31.0139	14.1033
Reptile1_Nums	1250.75	1039.56	1284.72	1043.05	1232.9	924.526	1034.74		1115.75	138.275	0.835556	0.290815	0.889141	0.299521	0.801565	0.083347	0.278983		1	0.831144	1.02715	0.833933	0.985724	0.739175	0.82729
Reptile2_Nums	711.001	605.403	728.647	607.704	698.915	543.99	599.786		642.207	70.0137	0.837095	0.299561	0.891514	0.311076	0.79102	0.0803356	0.272293		1	0.851479	1.02482	0.854715	0.983001	0.765104	0.843579
Reptile3_Nums	471.45	398.893	483.562	400.477	463.567	356.595	394.967		424.216	48.1914	0.836493	0.29963	0.890926	0.311149	0.792909	0.0802825	0.271947		1	0.846097	1.02569	0.849457	0.983278	0.756378	0.837769
Reptile4_Nums	309.092	258.853	317.676	259.862	302.296	230.469	256.009		276.322	33.04	0.839354	0.298497	0.894647	0.309172	0.784102	0.0825976	0.269337		1	0.837464	1.02777	0.840728	0.978013	0.745634	0.828262
Reptile5_Nums	220.195	181.583	226.523	182.277	215.14	159.036	178.972		194.818	25.58	0.839411	0.30244	0.892412	0.311972	0.78653	0.0809341	0.267808		1	0.824649	1.02874	0.8278	0.977045	0.722254	0.812792
Reptile6_Nums	161.768	130.586	166.782	131.057	158.081	113.266	129.11		141.521	20.4277	0.839185	0.296216	0.891882	0.304233	0.791213	0.0833005	0.271738		1	0.807246	1.031	0.810157	0.97721	0.700176	0.798122
Reptile7_Nums	123.108	96.9917	127.324	97.328	121.015	83.9061	96.9088		106.655	16.8176	0.836045	0.282794	0.890476	0.289595	0.803416	0.0880834	0.281127		1	0.787861	1.03425	0.790592	0.983	0.681567	0.787187
Reptile8_Nums	109.405	84.503	113.49	84.7779	108.792	73.3439	85.5732		94.2694	15.8557	0.830104	0.268963	0.887291	0.274713	0.820154	0.0934599	0.291689		1	0.772388	1.03734	0.7749	0.994403	0.67039	0.78217
Reptile9_Nums	96.0571	73.5483	99.7117	73.7819	95.8146	63.8604	74.8527		82.5181	14.2558	0.828872	0.264608	0.886106	0.27	0.824515	0.0953043	0.295391		1	0.765673	1.03805	0.768105	0.997476	0.664817	0.779253
Reptile10_Nums	73.9613	56.5315	76.7454	56.7086	73.8799	49.0469	57.5984		63.496	11.038	0.828464	0.264034	0.884997	0.269306	0.826582	0.0952625	0.296567		1	0.764338	1.03764	0.766733	0.9989	0.663143	0.778764
14600	1.70744	9.9899	23.6286	35.5354	43.616	49.9705	53.7497		49.326	49.6766	54.2289	0.81221	3.95077	5.9494	5.37836	4.78483		4.31653	3.92656	3.59899	3.32057	3.07999	3.8823	20.9371	38.5857	48.9645	55.8	60.0861	62.2632	62.8044	62.3257	61.3596	4.67419	26.484	48.1588	58.6694	68.6372	77.977	85.6299	91.2984	95.6104	98.3168	0.452249	1.27687	1.77565	2.08891	2.24444	2.25846	2.1499
[truncated: 175 more columns]

## Sheet: SSB
SPAWNING STOCK BIOMASS
No Stressors	FPL	FCO	FIV	TIV	HHW	FDE	FHB	THB	FHG	THG	FHS	FHE	BHP	FPB	TPB	FPM	FPR	RAY	SHR	REP
18615	951.579	38.0674	489.962	965.633	37.3447	76.4975	18.1507	220.988	659.539	530.507	829.704	276.264	11.6674	69.3204	313.899	41.2992	225.509	23.6399	168.785	44.2244
18980	964.347	38.1808	491.178	965.473	37.3831	75.8974	18.1962	221.664	660.903	530.755	833.927	276.718	12.0084	68.827	315.599	40.9249	225.679	23.693	168.982	44.5226
19345	977.849	37.9739	492.293	965.347	37.4015	75.2281	18.1934	221.305	662.573	530.667	834.384	277.001	12.3489	68.2542	317.284	40.5755	225.817	23.7706	169.155	44.9201
19710	985.507	37.7896	493.527	965.232	37.4112	74.4597	18.1957	221.001	663.787	530.537	834.88	277.283	12.6899	67.836	318.713	40.1974	225.775	23.9079	169.367	45.4231
20075	998.867	37.4355	494.668	965.824	37.423	73.6712	18.1663	220.205	663.426	530.266	833.204	277.454	13.036	67.4108	319.616	39.7906	225.721	24.0657	169.542	45.6176
mean	975.63	37.8894	492.326	965.502	37.3927	75.1508	18.1805	221.033	662.045	530.547	833.22	276.944	12.3501	68.3297	317.023	40.5575	225.7	23.8154	169.166	44.9416
SBB	1	1	1	1	1	1	1	1	1	1	1	1	1	1	1	1	1	1	1	1
status quo
18615	525.535	38.4871	459.793	316.935	2.00093	79.2825	14.6976	14.5309	684.663	321.121	770.984	104.861	0.000377	36.6738	229.538	17.6447	106.18	23.5013	10.9739	98.337
18980	548.574	38.4734	455.342	315.285	1.97596	79.5544	14.7122	14.5368	685.857	321.089	773.666	105.091	0.000373	36.8983	228.721	17.3999	106.442	23.5076	10.972	100.68
19345	547.072	38.1448	451.972	313.901	1.9511	79.5991	14.7049	14.5395	687.494	320.921	773.311	105.287	0.000369	37.0075	227.993	17.0957	106.588	23.5331	10.9543	103.017
19710	510.482	37.8415	449.413	313.028	1.9262	79.5212	14.703	14.5453	688.606	320.731	773.157	105.479	0.000365	37.0495	227.661	16.7495	106.609	23.615	10.9243	105.405
20074.5	530.566	37.4038	447.253	312.367	1.90206	79.3848	14.6809	14.5437	688.295	320.356	770.896	105.656	0.00036	36.8071	227.426	16.627	106.553	23.7122	10.8788	107.236
mean	532.446	38.0701	452.754	314.303	1.95125	79.4684	14.6997	14.5393	686.983	320.843	772.403	105.275	0.0003688	36.8872	228.268	17.1033	106.474	23.5739	10.9407	102.935
SBB	0.545746	1.00477	0.919624	0.325533	0.0521826	1.05745	0.808546	0.0657788	1.03767	0.604741	0.92701	0.38013	2.98621e-05	0.539842	0.720036	0.421706	0.471751	0.989856	0.064674	2.29041
Size limit
18615	524.781	38.5979	476.729	327.764	1.29884	79.6836	14.5911	13.1365	687.476	323.884	770.941	103.474	0	38.9643	230.585	21.8218	96.8458	23.5142	7.79832	98.0472
18980	551.697	38.5841	472.593	325.925	1.27674	79.7468	14.5878	13.1299	688.586	323.594	772.75	103.693	0	39.2195	229.918	21.5334	97.1075	23.5241	7.78445	100.281
19345	554.083	38.2514	469.475	324.533	1.25518	79.7015	14.5559	13.1121	690.026	323.055	771.09	103.899	0	39.3409	229.437	21.1949	97.2534	23.5529	7.759	102.498
19710	527.005	37.9513	466.755	323.413	1.23301	79.5815	14.523	13.0881	690.887	322.371	769.191	104.109	0	39.2617	229.057	20.7774	97.2795	23.6371	7.72375	104.794
20074.5	570.143	37.5499	464.593	322.878	1.21312	79.411	14.465	13.0544	690.41	321.44	764.94	104.294	0	39.0904	228.785	20.5919	97.2369	23.737	7.68361	106.717
mean	545.542	38.1869	470.029	324.902	1.25538	79.6249	14.5446	13.1042	689.477	322.869	769.783	103.894	0	39.1754	229.557	21.1839	97.1446	23.5931	7.74983	102.468
SBB	0.559169	1.00785	0.954712	0.336512	0.0335728	1.05953	0.800012	0.0592863	1.04143	0.608559	0.923865	0.375143	0	0.573328	0.724102	0.522317	0.430414	0.990663	0.0458119	2.28002
Catch Limit
18615	558.798	38.1961	513.203	613.874	17.5921	79.4429	19.1715	109.374	697.365	456.445	802.123	206.301	0.143042	41.4117	237.445	14.168	81.0135	23.2649	75.7382	64.2739
18980	560.304	38.1618	508.738	613.012	17.7844	79.4202	19.2077	109.617	698.564	456.554	805.348	206.719	0.135501	41.9427	237.886	14.0551	80.9359	23.2998	76.1981	65.2268
19345	564.333	37.8148	504.204	611.19	17.9367	79.3067	19.189	109.48	700.1	456.341	805.248	206.989	0.128722	42.3191	238.119	13.882	80.8091	23.3505	76.5421	66.2803
19710	618.554	37.5337	499.198	609.555	18.1142	79.1055	19.1708	109.503	701.188	456.052	805.3	207.276	0.122145	42.7359	238.477	13.9202	80.5969	23.4526	76.8575	67.6616
20074.5	648.779	37.0898	494.307	607.786	18.272	78.862	19.1186	109.37	700.577	455.525	802.905	207.54	0.115644	43.0999	238.488	13.8709	80.3952	23.5598	77.1476	68.5139
mean	590.153	37.7592	503.93	611.083	17.9399	79.2275	19.1715	109.469	699.559	456.183	804.185	206.965	0.129011	42.3019	238.083	13.9792	80.7501	23.3855	76.4967	66.3913
SBB	0.604895	0.996564	1.02357	0.632918	0.47977	1.05425	1.05451	0.495261	1.05666	0.859836	0.965153	0.747317	0.0104461	0.619085	0.750997	0.344676	0.357776	0.981948	0.452198	1.47728
Catch & size limit
18615	586.688	37.9652	511.776	633.045	13.6343	79.1276	18.9918	82.0582	700.368	451.36	802.717	198.335	0.031254	42.6485	227.799	13.1546	82.1631	23.2491	73.6298	65.6526
18980	576.003	37.9352	507.28	631.15	13.7142	79.1043	19.0363	82.2704	701.62	451.527	805.962	198.732	0.027634	43.1452	227.927	12.999	82.0572	23.2746	74.0107	66.7013
19345	572.989	37.593	502.246	628.579	13.7681	79.0005	19.0107	82.1431	703.214	451.372	805.825	198.969	0.024384	43.6036	227.9	12.7806	81.9023	23.3185	74.2746	67.8384
19710	601.54	37.3154	496.974	626.451	13.8307	78.8147	18.9917	82.0765	704.358	451.151	805.83	199.239	0.02151	43.8316	228.157	12.6973	81.662	23.4158	74.4912	69.2151
20074.5	645.868	36.902	492.133	624.903	13.908	78.5865	18.9516	82.0907	703.902	450.739	803.494	199.493	0.01878	44.1011	228.367	12.7157	81.4372	23.5225	74.7198	70.2676
mean	596.618	37.5422	502.082	628.826	13.7711	78.9267	18.9964	82.1278	702.692	451.23	804.766	198.954	0.0247124	43.466	228.03	12.8694	81.8444	23.3561	74.2252	67.935
SBB	0.611521	0.990835	1.01982	0.651294	0.368282	1.05024	1.04488	0.371564	1.0614	0.8505	0.96585	0.71839	0.00200099	0.636122	0.719286	0.317313	0.362624	0.980712	0.438771	1.51163
Catch&Size&noLBSP
18615	930.613	37.8	553.111	739.577	19.9316	78.6697	16.4877	65.2931	673.3	426.895	815.718	203.769	0.032864	59.907	245.203	42.2702	143.34	23.7586	91.1184	56.9982
18980	951.572	37.9263	555.048	739.862	20.088	78.0889	16.5382	65.0111	674.646	427.148	820.195	204.128	0.029064	59.7973	246.597	42.0776	143.149	23.8085	91.2699	57.8004
19345	967.637	37.7404	557.007	740.212	20.2289	77.4867	16.5373	64.3811	676.291	426.927	820.955	204.381	0.025636	59.7332	247.974	41.8643	142.937	23.8868	91.4092	58.7389
19710	986.515	37.5848	558.889	740.896	20.3793	76.8666	16.5376	63.7707	677.355	426.736	821.804	204.711	0.022594	59.6257	249.162	41.6072	142.599	24.0173	91.5753	59.7904
20074.5	992.17	37.2796	561.009	742.02	20.5361	76.2045	16.5041	63.2554	676.932	426.327	819.949	205.054	0.019891	59.5511	250.595	41.3065	142.286	24.1586	91.7079	60.397
mean	965.701	37.6662	557.013	740.513	20.2328	77.4633	16.521	64.3423	675.705	426.807	819.724	204.409	0.0260098	59.7229	247.906	41.8252	142.862	23.926	91.4161	58.745
SBB	0.989824	0.994109	1.13139	0.766973	0.541089	1.03077	0.90872	0.291099	1.02063	0.804466	0.983803	0.738087	0.00210604	0.87404	0.781983	1.03126	0.632973	1.00464	0.540392	1.30714
StatusQuo&NoLBSP
18615	754.504	38.0845	519.46	359.625	2.45572	81.157	13.8139	14.167	668.553	309.729	790.043	108.61	0.000391	45.9308	245.168	44.0504	127.759	24.1193	12.0882	80.8917
18980	780.559	38.2053	521.804	360.289	2.44366	80.6313	13.8432	14.1733	669.859	309.685	794.138	108.799	0.000387	45.9969	246.594	43.9648	128.23	24.1771	12.0814	82.5591
19345	804.76	38.0105	524.701	361.206	2.43399	80.0655	13.8439	14.1662	671.558	309.546	794.996	108.958	0.000383	46.0821	248.01	43.8834	128.683	24.2635	12.075	84.4232
19710	815.977	37.8563	527.261	361.797	2.42341	79.524	13.8387	14.1499	672.646	309.276	795.72	109.133	0.000378	46.1037	249.116	43.7203	128.955	24.4012	12.071	86.431
20074.5	839.001	37.5573	530.637	362.914	2.4173	79.0067	13.8142	14.1194	672.274	308.832	793.972	109.294	0.000374	46.1926	250.819	43.5694	129.25	24.554	12.0608	87.7751
mean	798.96	37.9428	524.773	361.166	2.43481	80.0769	13.8308	14.1551	670.978	309.414	793.774	108.959	0.0003826	46.0612	247.941	43.8377	128.575	24.303	12.0753	84.416
SBB	0.818918	1.00141	1.06591	0.374071	0.0651147	1.06555	0.76075	0.064041	1.01349	0.583198	0.952658	0.393433	3.09795e-05	0.674102	0.782094	1.08088	0.569673	1.02047	0.0713812	1.87835
FullReg (size and catch lmit, MPAs, No LBSP)
18615	927.853	37.8037	552.323	751.77	20.6188	78.6369	16.547	74.5304	673.421	429.475	816.804	205.385	0.064201	60.1146	244.916	42.5869	143.683	23.7747	94.5045	56.351
18980	948.782	37.9299	554.09	751.964	20.7574	78.0428	16.5836	74.3434	674.693	429.483	820.749	205.75	0.058494	60.0106	246.473	42.3759	143.473	23.8277	94.6736	57.14
19345	968.136	37.7456	556.1	752.375	20.9107	77.4466	16.5837	73.8839	676.325	429.411	821.582	205.97	0.053438	59.9106	247.827	42.1412	143.253	23.9074	94.83	58.0516
19710	981.524	37.5903	557.904	752.938	21.0584	76.7965	16.5791	73.4065	677.321	429.102	822.267	206.279	0.048797	59.7909	249.101	41.8214	142.93	24.0414	95.0112	59.08
20074.5	993.969	37.2857	560.233	754.28	21.2193	76.1168	16.5453	73.0168	676.864	428.63	820.259	206.614	0.044463	59.7097	250.613	41.4656	142.611	24.1866	95.1579	59.6715
mean	964.053	37.6711	556.13	752.665	20.9129	77.4079	16.5678	73.8362	675.725	429.22	820.332	206	0.0538786	59.9073	247.786	42.0782	143.19	23.9476	94.8354	58.0588
SBB	0.988134	0.994237	1.1296	0.779559	0.559278	1.03003	0.911294	0.334051	1.02066	0.809015	0.984533	0.743831	0.0043626	0.876739	0.781603	1.03749	0.634426	1.00555	0.560605	1.29187
WITH CLIMATE CHANGE: OA & Bleaching
Catch&Size&noLBSP
18615	852.162	39.4688	534.789	739.413	18.9752	78.8787	16.5459	70.4255	671.489	434.124	773.212	192.682	0.03246	61.9918	237.448	46.6884	145.108	23.3772	91.6285	56.4384
18980	869.919	39.878	534.903	739.291	19.07	78.3041	16.5488	70.4207	672.125	434.211	766.58	191.577	0.028722	62.1426	237.409	46.9529	145.025	23.4106	91.7827	57.1135
19345	879.582	40.1828	534.806	738.948	19.1517	77.7632	16.5291	70.1808	671.52	434.16	758.886	190.437	0.025346	62.299	237.217	47.1577	144.813	23.3666	91.8815	57.9644
19710	891.296	40.7233	534.067	738.125	19.2292	77.1723	16.5265	70.0994	670.473	434.3	756.34	189.629	0.022332	62.3305	237.098	47.2341	144.531	23.2775	91.9622	58.9048
20074.5	916.988	41.0403	533.992	738.67	19.3075	76.5592	16.5014	70.1435	669.454	434.414	749.409	188.757	0.019664	62.4387	237.264	47.3589	144.369	23.1967	91.9663	59.3818
mean	881.989	40.2586	534.512	738.889	19.1467	77.7355	16.5303	70.254	671.012	434.242	760.885	190.616	0.0257048	62.2405	237.287	47.0784	144.769	23.3257	91.8442	57.9606
SBB	0.90402	1.06253	1.08569	0.765291	0.512044	1.03439	0.909236	0.317844	1.01354	0.81848	0.913187	0.688285	0.00208134	0.910885	0.748486	1.16078	0.641422	0.979438	0.542923	1.28969
StatusQuo&NoLBSP
18615	815.462	40.0473	509.464	427.771	5.70651	79.2399	15.8364	51.5723	658.033	387.995	758.909	173.069	0.006859	55.8165	263.926	63.1893	137.656	23.7438	19.6242	77.8765
18980	827.094	40.4773	510.212	428.42	5.70918	78.691	15.8122	51.5521	658.953	387.954	752.327	172.117	0.006823	56.103	264.125	63.6815	138.066	23.7834	19.6275	79.3142
19345	822.482	40.801	509.983	428.395	5.7075	78.1027	15.75	51.4953	658.278	387.757	744.693	171.179	0.007317	56.2318	263.832	63.9339	138.3	23.7426	19.6128	80.8828
19710	839.234	41.367	509.657	428.29	5.70198	77.5359	15.7177	51.5089	657.25	387.715	742.106	170.499	0.008021	56.2884	263.94	63.93	138.457	23.6598	19.6008	82.6199
20074.5	852.602	41.7025	509.687	428.467	5.69774	76.9194	15.6629	51.3789	656.319	387.556	735.198	169.664	0.009014	56.3638	264.102	63.8308	138.58	23.5833	19.5765	83.6505
mean	831.375	40.8791	509.801	428.269	5.70458	78.0978	15.7558	51.5015	657.767	387.795	746.647	171.306	0.0076068	56.1607	263.985	63.7131	138.212	23.7026	19.6084	80.8688
SBB	0.852142	1.0789	1.03549	0.443571	0.152559	1.03921	0.866635	0.233004	0.993537	0.730936	0.896098	0.618557	0.00061593	0.821908	0.832701	1.57093	0.61237	0.995261	0.115912	1.79942
FullReg (size and catch lmit, MPAs, No LBSP)
18615	877.662	39.5292	536.493	754.041	19.78	78.8465	16.6051	79.2723	671.615	436.645	773.621	194.511	0.062449	62.1517	237.726	46.1004	145.134	23.3596	94.8965	55.8074
18980	872.866	39.9343	536.582	753.695	19.8828	78.2805	16.6072	79.3975	672.361	436.809	767.049	193.408	0.056898	62.3212	237.593	46.4104	145.017	23.3913	95.0595	56.4656
19345	884.817	40.2341	536.198	753.187	19.9666	77.7102	16.5867	79.2739	671.513	436.737	759.324	192.247	0.051953	62.3716	237.399	46.6204	144.739	23.347	95.1674	57.2495
19710	903.712	40.7606	535.519	752.589	20.0349	77.1026	16.5834	79.318	670.3	436.847	756.695	191.409	0.047422	62.3668	237.48	46.6631	144.467	23.2587	95.2312	58.1562
20074.5	915.783	41.0642	535.11	752.502	20.1056	76.5052	16.5562	79.4495	669.328	436.951	749.683	190.521	0.043147	62.378	237.547	46.6724	144.217	23.1749	95.2091	58.5981
mean	890.968	40.3045	535.98	753.203	19.954	77.689	16.5877	79.3422	671.024	436.798	761.274	192.419	0.0523738	62.3179	237.549	46.4934	144.715	23.3063	95.1127	57.2554
SBB	0.913223	1.06374	1.08867	0.780115	0.533633	1.03377	0.912393	0.358962	1.01356	0.823298	0.913654	0.694795	0.00424076	0.912017	0.749312	1.14636	0.641181	0.978622	0.562244	1.274

## Sheet: coralTrajectories
COMPARING TRAECTORIES CORALS UNDER CLIMATE CHANGE AND FISHERIES REGULATIONS
Size&Catch&NoLBSP	Time	FPL	FCO	FIV	TIV	HHW	FDE	FHB	THB	FHG	THG	FHS	FHE	BHP	FPB	TPB	FPM	FPR	RAY	SHR	REP	CRS	CRN	BFF	BC	BM	BD	CEP	BG	BSS	ZD	ZH	ZC	TRF	MA	CCA	PS	PL	PB	BB	DL	DR	DC	DIN	RelFPL	RelFCO	RelFIV	RelTIV	RelHHW
1975	0	163.804	9.20369	145.692	159.355	3.20342	101.044	4.00792	63.0406	89.5154	165.653	259.752	55.3802	0.85031	9.58446	77.0309	39.1596	103.822	3.54591	9.29063	69.4644	2624.44	10575	27838.5	1841.96	3023.88	7721.22	1823.99	25.469	17.9517	1017.79	785.199	1727.46	14182	14840.9	2183.71	349.207	149.66	48.9198	4.49054	5589.68	22358.7	0	3991.63	1	1	1	1	1
1976	365	168.794	16.8446	271.337	321.741	4.23899	91.2898	6.04541	85.7945	130.459	183.062	386.787	73.2801	0.798231	19.6044	116.555	68.8277	149.774	5.26226	13.6578	74.9319	2625.18	10491.9	27044.1	2330.41	3115.6	6478.43	4103.38	18.2901	14.9476	104.433	2907.67	4255.65	14051	15685	2513.3	912.744	3344.65	7.62696	0.281137	91.1904	54.7581	0	16134.6	1.03047	1.8302	1.8624	2.01902	1.32327
1977	730	173.029	23.7793	418.29	512.071	5.11637	92.4782	7.75027	118.545	187.001	208.101	475.226	93.5472	0.831562	32.3076	152.197	107.289	188.974	6.9603	18.6932	79.404	2636.57	10431.3	26177.7	1919.2	2986.5	4597.51	4952.9	20.6762	14.8312	56.2677	3317.22	3056.82	13891.5	15682.2	2612.17	847.356	2352.13	6.89064	0.401523	82.7414	60.8863	0	22549.2	1.05632	2.58367	2.87106	3.2134	1.59716
1978	1095	172.19	30.0015	575.912	715.021	5.88166	94.4569	9.54778	149.927	258.629	234.949	540.153	114.983	0.875706	47.2357	183.984	151.933	222.833	8.57494	24.3314	82.7948	2659.69	10411	25552.2	1670.25	2877.45	3431.6	4646.36	20.9255	14.722	40.0116	3103.19	1257.15	13722.6	15565.6	2666.9	1008.35	1900.98	7.4676	0.494406	90.6369	60.6744	0	30543.5	1.0512	3.25973	3.95295	4.48698	1.83606
1979	1460	177.441	37.9327	737.685	921.079	6.61727	96.617	11.863	173.853	340.246	262.871	611.744	137.835	0.920905	64.0879	211.371	197.673	253.239	10.0847	30.5869	85.504	2686.81	10406.3	25093.1	1531.16	2794.05	2728.58	4136.68	20.9359	14.6232	32.2064	4482.06	546.55	13548.8	15463.7	2722.59	730.598	1620.41	6.13688	0.480759	74.6727	60.3845	0	36878.6	1.08325	4.12147	5.06333	5.78005	2.06569
1980	1825	183.812	45.4372	890.499	1116.07	7.39626	98.9305	13.9465	194.71	427.184	290.331	676.515	160.852	0.980791	82.0312	235.514	234.744	281.283	11.3894	37.3919	87.8292	2718.58	10417.4	24756	1445.1	2709.31	2234.74	3701.76	20.9222	14.5306	19.3594	3841.17	161.068	13371.4	15373.4	2778.33	803.257	1406.76	6.09304	0.518382	74.513	59.0975	0	43608.7	1.12215	4.93685	6.11221	7.0037	2.30887
1981	2190	186.698	51.5027	1018.32	1283.56	8.21453	101.519	15.5242	211.483	513.436	317.58	725.374	182.189	1.05242	99.7471	256.586	257.938	306.822	12.527	44.7031	89.8573	2751.71	10429.1	24415.7	1386.97	2630.35	1883.91	3351.52	20.8789	14.4397	13.4219	3267.54	34.4813	13187.3	15281.9	2823.67	970.734	1274.41	6.76032	0.571247	83.6455	59.2399	0	50470.3	1.13977	5.59587	6.98953	8.05472	2.5643
1982	2555	186.262	56.0502	1107.44	1407.23	9.0767	103.998	16.6946	223.9	591.01	343.253	757.278	200.173	1.15407	115.569	275.103	268.792	329.779	13.5795	52.3871	91.6599	2787.44	10450.4	24168.4	1346.4	2567.96	1660.95	3082.81	20.8289	14.3532	9.2151	3604.25	9.88666	13000.7	15220.3	2875.21	856.92	1123.96	6.35683	0.568005	77.9924	60.2426	0	55672.8	1.13711	6.08997	7.60125	8.8308	2.83344
1983	2920	170.816	58.6273	1139.65	1460.89	9.96247	106.663	17.4007	232.782	645.795	368.703	773.629	212.539	1.26789	126.328	291.466	264.213	350.672	14.6821	60.3034	93.3026	2824.53	10472.5	23889.3	1316.27	2503.68	1473	2871.26	20.7583	14.2677	7.23515	3091	2.88032	12811.3	15148.6	2920.22	970.381	1024.32	6.83643	0.585143	83.5474	60.4588	0	61879.1	1.04281	6.36998	7.82236	9.16754	3.10995
1984	3285	136.097	59.1715	1090.03	1410.31	10.8515	108.843	17.4552	238.11	652.804	391.837	775.701	216.418	1.39104	127.313	304.876	237.021	368.943	15.8942	68.326	94.8484	2863.09	10503.4	23662.6	1295.25	2469.4	1386.14	2702.24	20.6917	14.1849	6.70252	6466.39	3.63815	12623.3	15117.9	2976.67	541.126	898.543	4.95941	1.00383	63.8051	94.7283	0	64090.4	0.830852	6.42911	7.48178	8.85012	3.38747
1985	3650	80.7973	58.4524	923.825	1210.21	11.7792	111.144	16.7662	239.643	652.508	414.889	765.325	208.358	1.52537	111.555	315.89	182.154	383.884	17.2533	76.2479	96.3657	2907.14	10559.6	23535.8	1276.54	2419.92	1287.41	2579.81	20.6737	14.1127	4.24956	4086.37	2.16954	12435.2	15123.4	3044.95	794.548	767.284	6.11317	0.67906	75.5208	69.6719	0	70156.9	0.493256	6.35097	6.34095	7.59443	3.67708
1986	4015	78.7183	58.3412	884.377	1132.33	11.9696	112.457	16.4876	209.535	628.7	425.113	768.21	207.069	1.4126	108.672	317.221	142.561	385.287	18.0326	79.7215	97.7936	2951.7	10609.2	23346.7	1262.9	2374.64	1212.21	2478.32	20.6559	14.0361	3.58026	3076.41	1.66799	12249.3	15142.7	3131.46	936.175	608.563	6.5793	0.605999	80.8864	61.7292	0	75023.1	0.480564	6.3389	6.07019	7.10574	3.73652
1987	4380	75.7295	57.7277	832.172	1056.05	12.1401	113.925	16.0159	186.55	621.537	435.347	767	204.147	1.30456	104.024	317.323	113.111	384.57	18.6945	82.7021	99.1666	2990.48	10650.8	23111.3	1254.3	2335.29	1163.89	2397.18	20.5849	13.9548	3.91274	3578.75	1.88602	12066.7	15087.9	3197.78	915.937	371.266	6.71189	0.709972	82.8484	66.8739	0	79479.9	0.462318	6.27224	5.71187	6.62701	3.78975
1988	4745	73.6584	56.9254	773.03	978.929	12.3172	113.873	15.5724	168.834	615.632	441.75	764.002	199.354	1.19018	97.6858	314.586	96.6765	380.913	19.2693	84.8002	100.449	3033.57	10694.1	22898	1247.84	2296.01	1113.93	2333.85	20.5123	13.8727	4.09534	2891.11	2.05858	11888.9	15050.8	3261.63	1013.02	207.398	7.18405	0.651906	87.7432	63.4157	0	84206	0.449675	6.18506	5.30593	6.14308	3.84503
1989	5110	72.8938	55.6464	719.684	911.409	12.5007	114.096	15.2621	154.715	609.764	448.175	759.407	194.646	1.08784	91.0353	310.541	88.2493	375.751	19.7595	86.6667	101.668	3014.84	10707.7	22646.2	1242.8	2259.98	1070.62	2281.33	20.4325	13.7806	5.46035	3756.45	1.98889	11713.7	14997.9	3313.93	2655.06	135.824	12.8846	2.25563	168.538	100.481	0	86526.8	0.445007	6.0461	4.93977	5.71937	3.90231
1990	5475	78.8922	54.6705	675.957	856.798	12.7233	112.013	15.0153	143.82	604.585	449.558	757.669	190.573	0.995382	84.6241	302.937	83.6508	369.861	20.2094	87.3733	102.926	3072.12	10801.5	22645.6	1236	2260.76	1112.46	2260.74	20.406	13.7033	4.81676	3336.02	1.82134	11544.4	15032.6	3403.62	878.391	104.117	6.7956	0.640157	82.5205	67.3717	0	90621.7	0.481626	5.94006	4.63964	5.37667	3.97178
1991	5840	80.2795	53.9863	639.96	811.839	12.9563	110.331	14.8029	134.849	600.175	451.987	758.6	186.91	0.912407	78.6214	295.384	79.8717	361.472	20.6448	88.2772	104.289	3119.06	10857.2	22436.2	1234.05	2228.92	1087.37	2239.86	20.3286	13.6191	6.22618	3090.91	1.75313	11382	14995	3458.19	1065.29	91.2114	7.85527	0.780258	96.5088	71.781	0	94870.4	0.490095	5.86573	4.39256	5.09454	4.04453
1992	6205	82.6989	53.3038	611.461	776.299	13.2095	105.022	14.6242	127.652	596.604	448.394	760.11	183.732	0.837787	73.0886	283.668	75.8813	352.498	21.0562	87.4096	105.696	3167.95	10911.1	22333	1235.47	2221.09	1124.69	2223.59	20.265	13.5358	9.61894	6575.98	3.7364	11229.7	14978	3521.18	960.029	73.3274	12.6643	2.56105	163.464	120.24	0	95125.7	0.504866	5.79157	4.19695	4.87151	4.12356
1993	6570	87.501	52.83	590.415	750.417	13.5079	100.269	14.5302	121.967	594.457	446.446	762.738	181.181	0.769229	68.2747	273.977	71.5786	342.938	21.428	87.8848	107.167	3222.22	10980	22301.4	1232.82	2198.31	1121.93	2232.28	20.2552	13.4594	9.94174	3312.86	1.96942	11082.8	15016.8	3592.68	957.597	62.0761	7.43107	0.762792	90.8518	74.2237	0	101069	0.534181	5.7401	4.05249	4.70909	4.21673
1994	6935	87.3675	52.1154	574.287	731.762	13.7679	89.6822	14.4711	117.147	592.968	438.811	763.6	179.313	0.70201	64.365	260.23	67.0202	329.978	21.7574	87.5353	108.59	3276.32	11036.9	22113.5	1233.29	2171.14	1102.09	2233.28	20.145	13.3731	15.4219	2747	1.82421	10937	14924.5	3627.25	1124.8	47.722	8.40598	0.769862	102.334	70.7037	0	105256	0.533366	5.66245	3.94179	4.59203	4.29789
1995	7300	92.8629	51.0662	562.687	719.144	14.0381	82.3182	14.4557	112.861	591.831	434.57	761.465	178.124	0.641018	60.8739	253.731	62.875	316.3	22.0362	87.8218	110.01	3340.46	11129.1	22150.4	1232.32	2167.15	1201.21	2242.98	20.0651	13.2918	25.1248	4644.23	2.90396	10798.6	14948.5	3692.59	654.572	37.0655	5.66552	0.632183	69.5123	70.8145	0	105199	0.566915	5.54845	3.86217	4.51285	4.38223
1996	7665	89.1355	50.0575	552.765	709.085	14.3283	77.2087	14.4698	109.319	590.913	429.226	758.754	177.293	0.585467	57.9686	247.575	59.5085	302.71	22.2531	87.6165	111.484	3410.51	11228	22029.3	1226.84	2136.42	1170.98	2265.2	20.0049	13.2116	35.4317	2326.61	1.37383	10663.8	14878.8	3728.3	1108.67	31.549	7.38728	0.621135	88.9236	65.6834	0	109358	0.54416	5.43885	3.79407	4.44972	4.47283
1997	8030	85.0227	48.9439	544.7	700.348	14.5434	75.7823	14.5109	106.079	589.114	423.656	754.083	176.476	0.532558	55.4694	242.01	56.9173	284.194	22.4154	87.2576	112.885	3417.53	11303.2	21919	1224.15	2115.05	1198.88	2278.95	19.8937	13.1217	72.7276	2995.35	1.65402	10528.4	14817.6	3765.18	985.62	27.1166	7.24567	0.715903	88.1219	71.6108	0	110980	0.519052	5.31786	3.73872	4.3949	4.53996
1998	8395	80.5415	48.533	538.067	692.518	14.7679	75.225	14.5982	103.103	590.362	418.784	753.63	175.824	0.484455	53.3584	237.417	55.0158	266.746	22.5833	86.9573	114.441	3479.19	11369.6	21738.3	1225.69	2089.87	1178.51	2285.03	19.7873	13.0345	155.735	2476.37	1.84216	10398	14738.7	3792.48	1281.07	24.4776	9.19112	0.776852	111.309	75.2388	0	113924	0.491695	5.27321	3.69318	4.34576	4.61005
1999	8760	77.6288	47.5713	531.989	685.619	14.9916	74.822	14.6482	100.017	591.599	413.812	748.439	175.229	0.440854	51.4161	233.226	53.6028	249.979	22.6375	86.5178	115.963	3531.78	11442.9	21516.4	1229.93	2060.87	1145	2290.48	19.6829	12.9453	387.745	2909.37	1.56851	10269.3	14660.8	3817.94	1222.16	22.357	10.3712	1.06522	125.427	80.4593	0	116230	0.473913	5.16872	3.65147	4.30247	4.67988
2000	9125	76.2596	46.5337	526.149	679.069	15.1864	74.5247	14.6794	97.2414	590.197	409.008	742.094	174.768	0.399531	49.7483	229.233	52.4429	230.653	22.6128	86.0625	117.402	3607.91	11537.1	21298.8	1226.92	2033.65	1118.16	2289.59	19.5942	12.8573	750.948	1848.5	0.916837	10148	14612.5	3848.19	1284.27	20.8216	8.81226	0.715511	106.295	74.1146	0	119661	0.465555	5.05599	3.61138	4.26136	4.7407
2001	9490	77.7203	45.7386	520.209	673.137	15.3911	74.3116	14.7171	94.7881	587.299	404.801	737.57	174.448	0.362782	48.2634	225.831	51.3546	219.545	22.5578	85.7407	118.981	3680.81	11629	21133.2	1223.91	2012.15	1099.65	2277.88	19.5273	12.7704	1178.79	2785.64	1.61705	10033.9	14604.2	3884.7	1032.77	19.4058	8.37338	0.782076	101.821	79.0925	0	120715	0.474472	4.96959	3.57061	4.22414	4.8046
2002	9855	81.2123	44.9389	514.705	667.477	15.6079	74.1632	14.7669	92.669	582.721	401.378	734.92	174.181	0.330565	46.9647	222.862	50.252	209.413	22.5135	85.512	120.44	3758.2	11733.2	21016.9	1217.54	1993.36	1092.14	2263.48	19.4887	12.6885	1615.53	2660.6	1.46817	9923.93	14618.1	3923.18	978.215	18.266	7.33388	0.703543	89.11	78.4656	0	121874	0.49579	4.88271	3.53284	4.18862	4.87227
2003	10220	81.2431	44.476	509.459	662.526	15.7807	74.0432	14.8618	91.1349	578.199	399.06	737.042	174.111	0.300213	45.788	220.371	49.03	201.278	22.5026	85.453	122.059	3828.79	11811.2	20842.3	1213.25	1973.5	1079.26	2246.88	19.4253	12.6048	2104.02	1655.76	1.49729	9811.06	14586.5	3952.2	1367.88	17.3929	9.33925	0.758233	112.028	80.5743	0	124405	0.495978	4.83242	3.49683	4.15755	4.92622
2004	10585	84.2719	43.8949	504.653	658.067	15.9239	73.9463	14.957	89.7353	575.685	397.241	738.74	174.064	0.273878	44.6582	218.309	47.6579	193.867	22.4915	85.3463	123.714	3899.61	11881.8	20654.5	1216.25	1953.21	1063.06	2232.15	19.3557	12.5201	2621.55	1561.6	1.32915	9700.02	14555.8	3981.52	1468.27	16.6469	9.33009	0.744263	111.775	81.1178	0	126528	0.514468	4.76928	3.46384	4.12957	4.9709
2005	10950	124.94	43.2771	502.454	656.897	16.2036	73.871	15.0691	88.3311	574.694	395.946	740.947	173.953	0.250738	43.912	216.61	46.3552	187.325	22.5041	85.1759	125.427	3978.93	11977.3	20524.8	1242.01	1941.46	1056.87	2220.62	19.3345	12.4398	3791.16	1592.85	1.14287	9607.14	14595.4	4025	1334.87	16.1611	8.95265	0.728729	107.498	86.0507	0	127910	0.762741	4.70215	3.44874	4.12223	5.05821
2006	11315	131.254	42.6787	500.299	655.55	16.2342	73.7867	15.1699	86.9507	575.025	394.67	743.23	173.856	0.226645	43.2768	215.131	44.8381	181.582	22.5354	84.9884	127.175	4058.36	12065.9	20678.8	1245.68	1935.37	1094.05	2208.89	19.2993	12.3577	4143.72	4137.43	1.85833	9518.74	14610.2	4059.71	3610.9	15.9843	17.7769	2.95995	228.725	158.949	0	123325	0.801285	4.63713	3.43396	4.11377	5.06777
2007	11680	134.427	42.1221	497.74	653.66	16.1503	73.8631	15.2875	85.9568	573.467	393.978	746.82	173.886	0.205941	42.6807	213.687	43.2856	176.71	22.5489	84.8392	128.814	4155.5	12213.9	21058.8	1232.33	1947.42	1231.16	2248.29	19.4865	12.2922	4771.89	2311.01	1.24274	9496.95	14936.5	4154.72	898.455	15.4211	8.0712	1.22542	101.109	99.0393	0	124822	0.820655	4.57665	3.41639	4.10192	5.0416
2008	12045	137.217	41.5378	494.644	651.158	16.0466	74.1466	15.4066	85.0404	570.95	393.35	749.219	174.026	0.187418	42.1528	212.171	41.8109	172.501	22.5939	84.6169	130.48	4241.2	12304	20981.3	1221.34	1928.91	1228.23	2271.95	19.4866	12.2161	5941.06	1299.82	0.868601	9466.06	14936.3	4192.97	1092.47	15.4595	8.18906	0.692739	97.9991	88.0854	0	127009	0.837688	4.51317	3.39514	4.08621	5.00922
2009	12410	195.87	41.0857	492.679	650.796	16.0767	74.793	15.5235	84.2606	571.885	392.851	751.626	174.302	0.170839	42.0976	210.782	40.8327	169.038	22.6379	84.2859	132.246	4327.03	12395.9	20911.3	1254.07	1923.21	1222.98	2272.42	19.4991	12.1395	8492.67	3294.39	1.8971	9456.19	14974.1	4243.13	1821.11	15.5001	19.6851	3.62419	273.222	178.123	0	124045	1.19576	4.46404	3.38165	4.08394	5.0186
2010	12775	220.437	40.4141	490.466	651.039	16.1732	75.6709	15.6234	83.7216	572.263	392.347	752.098	174.647	0.155973	42.2516	209.282	40.2294	166.142	22.6412	83.9411	134.021	4403.12	12497.9	20901.7	1247.24	1918.3	1238.51	2267.8	19.5594	12.0671	8631.85	1112.04	0.750425	9425.17	15055.2	4314.35	1148.78	15.6257	8.47513	0.715185	100.41	95.51	0	127817	1.34574	4.39108	3.36646	4.08547	5.04873
2011	13140	237.506	40.0696	488.231	650.565	16.2985	76.5001	15.7298	83.4129	573.192	392.12	755.004	175.075	0.142494	42.2728	208.018	39.749	164.085	22.6601	83.6922	136.067	4504.04	12633.9	21117.6	1252.39	1953.85	1301.08	2270.15	19.7807	12.0059	9291.88	1651.67	1.08682	9377.35	15429.7	4458.97	1306.6	15.3713	9.40449	1.22175	118.045	107.841	0	125969	1.44994	4.35365	3.35112	4.08249	5.08785
2012	13505	257.918	39.698	485.82	649.26	16.4224	77.0659	15.8101	82.9514	572.494	391.746	756.253	175.269	0.130143	42.231	206.851	39.3625	162.192	22.6618	83.4867	137.749	3857.5	12117.4	21193.6	1239.83	1937.4	1308.32	2268.01	19.8227	11.8571	10443.4	1072.55	0.730674	9292.29	15486.1	4553.46	1246.4	15.4136	8.8643	0.71972	106.281	98.5837	0	126444	1.57455	4.31327	3.33457	4.0743	5.12652
2013	13870	321.268	39.4162	484.45	649.481	16.6008	77.5155	15.881	82.4392	570.709	391.648	756.712	175.224	0.11871	42.4896	205.819	39.3684	160.412	22.6579	83.4055	139.495	3943.78	12225.8	21287.8	1274.09	1925.25	1338.83	2262.14	19.9482	11.7785	12215.7	1433.09	0.889595	9216.09	15679.3	4692.42	1025.59	15.2172	7.84176	0.755015	94.9148	103.059	0	125549	1.9613	4.28265	3.32517	4.07569	5.1822
2014	14235	357.937	39.3453	483.197	649.51	16.7739	77.842	15.9621	82.1126	570.099	391.78	759.593	175.364	0.108144	42.7385	205.09	39.2861	159.11	22.6858	83.3785	141.426	3993.73	12293.1	21317.5	1283.06	1920.04	1323.48	2251.7	19.9736	11.7103	12755.3	3072.79	1.45949	9134.96	15709	4815.43	660.445	15.8616	6.9912	0.855166	84.1997	112.358	0	125626	2.18516	4.27495	3.31657	4.07587	5.23626
2015	14600	389.463	39.1773	481.998	649.083	16.9462	78.0113	16.0211	81.7855	569.382	391.903	761.068	175.456	0.098281	42.8715	204.491	39.1747	157.973	22.7298	83.3354	143.363	3840.52	12302.9	21348.8	1284.77	1898.15	1303.73	2241.91	19.9636	11.6307	13703.6	2045.63	1.20917	9055.63	15668	4920.61	1996.59	16.12	12.9884	0.954567	152.342	135.051	0	126633	2.37762	4.2567	3.30834	4.07319	5.29004
2016	14965	426.076	38.8316	481.619	649.066	17.1207	77.9941	16.0561	81.4628	568.591	391.86	759.883	175.425	0.089183	43.0613	203.966	39.1628	156.647	22.762	83.272	145.258	3492.32	12275.9	21388.3	1294.42	1878.9	1294.79	2226.48	19.9078	11.538	14816.5	1475.18	0.843711	8985.61	15591.6	4994.62	1246.35	16.0724	10.5917	1.10565	128.593	114.796	0	128452	2.60114	4.21913	3.30574	4.07308	5.3445
2017	15330	467.68	38.5309	481.161	648.755	17.2715	77.8631	16.0896	81.3429	567.851	391.7	758.33	175.366	0.080902	43.2147	203.491	39.2027	155.525	22.773	83.2649	147.248	3565.01	12399.8	22355.8	1290.29	1891.37	1500.49	2237.42	19.9384	11.4745	15854.3	3448.25	1.71365	8931.81	15788.7	5104.02	396.686	15.5793	5.21801	0.593834	61.5084	107.403	0	121104	2.85512	4.18647	3.30259	4.07114	5.3916
2018	15695	516.729	38.3891	480.558	648.159	17.4111	77.5971	16.1384	81.3822	567.402	391.871	759.307	175.388	0.073293	43.4017	203.175	39.2897	154.593	22.8061	83.4444	149.041	3648.39	12498.5	22539.6	1279.65	1877.14	1492.32	2277.03	19.9471	11.4168	16884.3	1275.51	0.749942	8836.51	15713.7	5143.31	1002.95	15.4671	8.0625	0.702076	95.2489	112.251	0	121914	3.15456	4.17106	3.29845	4.06739	5.43518
2019	16060	564.995	38.2666	480.055	647.376	17.5328	77.2488	16.1692	81.1447	567.518	391.844	759.948	175.324	0.066275	43.6359	203.021	39.3838	153.777	22.8266	83.5626	150.883	3671.2	12547.3	22596.4	1284.73	1860.72	1469.02	2310.29	19.8367	11.348	17758.5	1287.18	0.758634	8753.09	15588.4	5169.75	1148.42	15.696	9.15501	0.77664	108.633	119.068	0	123855	3.44922	4.15775	3.295	4.06248	5.47317
2020	16425	605.936	38.1351	479.915	646.461	17.6401	76.8421	16.1969	80.7686	567.873	391.716	760.352	175.232	0.059778	43.8556	202.927	39.6314	152.962	22.8172	83.5614	152.771	3577.49	12576	22706	1281.41	1881.29	1445.64	2321.88	19.7676	11.2731	18840.9	1212.15	0.932163	8683.72	15527.9	5208.79	1333.45	15.8755	10.4877	0.891589	124.853	127.648	0	123524	3.69915	4.14346	3.29404	4.05674	5.50665
2021	16790	646.462	38.0142	479.937	645.674	17.7369	76.381	16.2163	80.4268	567.416	391.517	760.516	175.12	0.053855	44.0823	202.999	39.9528	152.264	22.7913	83.5661	154.757	3627.36	12631.9	22765.4	1284.86	1863.08	1422.15	2321.56	19.6759	11.2071	18963.6	1265.06	1.03975	8614.38	15424.9	5236.7	1231.44	15.9437	9.75031	0.816217	115.61	122.08	0	125120	3.94656	4.13032	3.29419	4.0518	5.53685
2022	17155	681.868	38.0004	480.285	645.109	17.8463	75.8963	16.2499	80.1827	567.69	391.385	762.244	175.097	0.048455	44.2956	203.351	40.5259	151.798	22.8066	83.5766	156.94	3707.58	12714.8	22927.7	1285.52	1900.53	1415.59	2316.65	19.6385	11.1499	20091.5	1130.61	0.893013	8551.73	15407.7	5278.93	1284.74	15.9435	9.96626	0.814724	117.757	124.9	0	124785	4.16271	4.12883	3.29658	4.04825	5.57103
2023	17520	712.96	37.8598	480.616	644.781	17.9446	75.3715	16.2617	79.9813	566.147	391.096	760.511	174.816	0.043439	44.5434	203.724	41.1348	151.173	22.8047	83.6076	159.1	2654.43	11235.9	23018.7	1291.37	1874.89	1399.23	2309.52	19.6276	10.8965	19997.9	1328.99	0.910561	8562.31	15465.6	5331.19	1248.06	15.8136	9.67162	0.801514	114.413	124.717	0	125913	4.35252	4.11355	3.29886	4.0462	5.60172
2024	17885	716.913	37.9458	480.967	644.565	18.0535	74.872	16.2885	80.1384	564.827	391.246	757.33	174.162	0.038786	44.7901	203.922	41.8011	150.765	22.8161	83.6809	161.006	2381.69	10919.1	24204.4	1276.86	1892	1617.29	2358.17	20.0945	10.7579	19326.4	1918.39	1.3789	8542.58	16155.6	5500.14	898.391	15.3575	7.67613	1.14398	95.3122	125.373	0	119346	4.37665	4.12289	3.30126	4.04484	5.6357
2025	18250	742.415	38.0457	481.375	644.923	18.163	74.3103	16.2999	80.3159	564.671	391.221	752.952	173.421	0.034483	44.9855	204.152	42.4151	150.459	22.8327	83.8033	162.91	1565.09	9260.31	24474.7	1278.02	1868.86	1599.58	2395.36	20.1805	10.4744	20823	1726.88	1.61522	8529.8	16247	5566.76	1019.8	15.1466	9.12984	0.778394	107.082	127.234	0	118580	4.53234	4.13375	3.30406	4.04709	5.66987
2026	18615	749.642	38.5156	481.844	645.471	18.2728	73.7241	16.3136	80.3895	566.127	391.366	746.543	172.29	0.030617	45.1509	204.29	43.0048	150.389	22.8556	83.9697	165.017	1310.94	8699	24676.8	1271.96	1848.06	1568.11	2404.21	20.3522	10.2184	20044.3	2482.67	1.67136	8514.69	16392.2	5646.56	1474.16	14.9401	10.2705	1.31172	125.907	138.329	0	120453	4.57646	4.1848	3.30728	4.05053	5.70417
2027	18980	735.798	38.8481	481.645	645.547	18.4029	73.1894	16.2999	80.3305	566.73	391.414	739.634	171.242	0.027063	45.2743	204.14	43.6247	150.028	22.8051	84.0693	167.076	1047.15	8187.68	25133.8	1256.28	1864.63	1580.23	2400.92	20.5995	10.0545	19346.3	1988.68	1.56478	8464.51	16738.6	5751.66	690.671	14.774	6.05353	0.645285	71.534	117.572	0	121915	4.49194	4.22092	3.30592	4.051	5.74476
2028	19345	756.699	39.3136	481.367	646.057	18.5074	72.6095	16.2891	80.3448	566.341	391.539	735.496	170.391	0.023848	45.3325	204.247	44.2059	149.89	22.7334	84.1809	169.376	1059.24	8262.53	25407.3	1259.24	1838.57	1555.13	2393.32	20.6094	10.0042	21387.5	1747.76	1.44491	8392.95	16703	5777.07	869.725	14.6177	7.21488	0.710363	84.8081	126.117	0	122075	4.61954	4.2715	3.30401	4.05421	5.77738
2029	19710	761.893	39.5926	480.735	646.133	18.5939	71.9685	16.2575	80.2701	565.282	391.572	730.216	169.579	0.020989	45.364	204.232	44.61	149.554	22.6575	84.2087	171.646	703.373	7068.83	25675.7	1254.29	1815.05	1534.28	2375.51	20.6355	9.75776	20504.4	2319.3	1.38253	8390.21	16803.3	5839.58	752.047	14.4437	6.71498	0.672243	79.4885	125.607	0	124556	4.65125	4.30182	3.29967	4.05468	5.80439
2030	20074.5	745.432	40.22	479.952	646.114	18.6822	71.325	16.245	80.464	564.857	391.935	726.521	168.844	0.018293	45.3825	204.081	45.0307	149.639	22.5997	84.2636	173.769	728.251	7192.32	26939.8	1243.89	1809.9	1686.17	2402.66	20.8651	9.69372	20197.2	2254.16	1.71128	8319.71	17146.6	5920.59	691.129	14.3219	9.86655	0.788633	113.961	139.745	0	120060	4.55076	4.36998	3.29429	4.05456	5.83197
Status Quo & No LBSP
	0	163.804	9.20369	145.692	159.355	3.20342	101.044	4.00792	63.0406	89.5154	165.653	259.752	55.3802	0.85031	9.58446	77.0309	39.1596	103.822	3.54591	9.29063	69.4644	2624.44	10575	27838.5	1841.96	3023.88	7721.22	1823.99	25.469	17.9517	1017.79	785.199	1727.46	14182	14840.9	2183.71	349.207	149.66	48.9198	4.49054	5589.68	22358.7	0	3991.63	1	1	1	1	1
	365	168.794	16.8446	271.337	321.741	4.23899	91.2898	6.04541	85.7945	130.459	183.062	386.787	73.2801	0.798231	19.6044	116.555	68.8277	149.774	5.26226	13.6578	74.9319	2625.18	10491.9	27044.1	2330.41	3115.6	6478.43	4103.38	18.2901	14.9476	104.433	2907.67	4255.65	14051	15685	2513.3	912.744	3344.65	7.62696	0.281137	91.1904	54.7581	0	16134.6	1.03047	1.8302	1.8624	2.01902	1.32327
	730	173.029	23.7793	418.29	512.071	5.11637	92.4782	7.75027	118.545	187.001	208.101	475.226	93.5472	0.831562	32.3076	152.197	107.289	188.974	6.9603	18.6932	79.404	2636.57	10431.3	26177.7	1919.2	2986.5	4597.51	4952.9	20.6762	14.8312	56.2677	3317.22	3056.82	13891.5	15682.2	2612.17	847.356	2352.13	6.89064	0.401523	82.7414	60.8863	0	22549.2	1.05632	2.58367	2.87106	3.2134	1.59716
	1095	172.19	30.0015	575.912	715.021	5.88166	94.4569	9.54778	149.927	258.629	234.949	540.153	114.983	0.875706	47.2357	183.984	151.933	222.833	8.57494	24.3314	82.7948	2659.69	10411	25552.2	1670.25	2877.45	3431.6	4646.36	20.9255	14.722	40.0116	3103.19	1257.15	13722.6	15565.6	2666.9	1008.35	1900.98	7.4676	0.494406	90.6369	60.6744	0	30543.5	1.0512	3.25973	3.95295	4.48698	1.83606
	1460	177.441	37.9327	737.685	921.079	6.61727	96.617	11.863	173.853	340.246	262.871	611.744	137.835	0.920905	64.0879	211.371	197.673	253.239	10.0847	30.5869	85.504	2686.81	10406.3	25093.1	1531.16	2794.05	2728.58	4136.68	20.9359	14.6232	32.2064	4482.06	546.55	13548.8	15463.7	2722.59	730.598	1620.41	6.13688	0.480759	74.6727	60.3845	0	36878.6	1.08325	4.12147	5.06333	5.78005	2.06569
	1825	183.812	45.4372	890.499	1116.07	7.39626	98.9305	13.9465	194.71	427.184	290.331	676.515	160.852	0.980791	82.0312	235.514	234.744	281.283	11.3894	37.3919	87.8292	2718.58	10417.4	24756	1445.1	2709.31	2234.74	3701.76	20.9222	14.5306	19.3594	3841.17	161.068	13371.4	15373.4	2778.33	803.257	1406.76	6.09304	0.518382	74.513	59.0975	0	43608.7	1.12215	4.93685	6.11221	7.0037	2.30887
	2190	186.698	51.5027	1018.32	1283.56	8.21453	101.519	15.5242	211.483	513.436	317.58	725.374	182.189	1.05242	99.7471	256.586	257.938	306.822	12.527	44.7031	89.8573	2751.71	10429.1	24415.7	1386.97	2630.35	1883.91	3351.52	20.8789	14.4397	13.4219	3267.54	34.4813	13187.3	15281.9	2823.67	970.734	1274.41	6.76032	0.571247	83.6455	59.2399	0	50470.3	1.13977	5.59587	6.98953	8.05472	2.5643
	2555	186.262	56.0502	1107.44	1407.23	9.0767	103.998	16.6946	223.9	591.01	343.253	757.278	200.173	1.15407	115.569	275.103	268.792	329.779	13.5795	52.3871	91.6599	2787.44	10450.4	24168.4	1346.4	2567.96	1660.95	3082.81	20.8289	14.3532	9.2151	3604.25	9.88666	13000.7	15220.3	2875.21	856.92	1123.96	6.35683	0.568005	77.9924	60.2426	0	55672.8	1.13711	6.08997	7.60125	8.8308	2.83344
	2920	170.816	58.6273	1139.65	1460.89	9.96247	106.663	17.4007	232.782	645.795	368.703	773.629	212.539	1.26789	126.328	291.466	264.213	350.672	14.6821	60.3034	93.3026	2824.53	10472.5	23889.3	1316.27	2503.68	1473	2871.26	20.7583	14.2677	7.23515	3091	2.88032	12811.3	15148.6	2920.22	970.381	1024.32	6.83643	0.585143	83.5474	60.4588	0	61879.1	1.04281	6.36998	7.82236	9.16754	3.10995
	3285	136.097	59.1715	1090.03	1410.31	10.8515	108.843	17.4552	238.11	652.804	391.837	775.701	216.418	1.39104	127.313	304.876	237.021	368.943	15.8942	68.326	94.8484	2863.09	10503.4	23662.6	1295.25	2469.4	1386.14	2702.24	20.6917	14.1849	6.70252	6466.39	3.63815	12623.3	15117.9	2976.67	541.126	898.543	4.95941	1.00383	63.8051	94.7283	0	64090.4	0.830852	6.42911	7.48178	8.85012	3.38747
	3650	80.7973	58.4524	923.825	1210.21	11.7792	111.144	16.7662	239.643	652.508	414.889	765.325	208.358	1.52537	111.555	315.89	182.154	383.884	17.2533	76.2479	96.3657	2907.14	10559.6	23535.8	1276.54	2419.92	1287.41	2579.81	20.6737	14.1127	4.24956	4086.37	2.16954	12435.2	15123.4	3044.95	794.548	767.284	6.11317	0.67906	75.5208	69.6719	0	70156.9	0.493256	6.35097	6.34095	7.59443	3.67708
	4015	78.207	58.3467	870.217	1023.92	10.986	112.419	16.2359	160.372	627.768	418.482	765.003	201.25	0.737879	103.437	314.475	133.565	365.24	18.035	69.4717	97.834	2951.75	10609.3	23345.7	1262.91	2374.6	1213.7	2474.18	20.6269	14.0371	3.56279	3041.91	1.65918	12250.6	15080.3	3131.83	933.14	607.862	6.54315	0.602152	80.4628	61.1004	0	74991.8	0.477443	6.33949	5.973	6.42538	3.42945
	4380	74.8554	57.7541	808.582	866.235	10.2755	113.861	15.6855	120.061	619.966	422.243	761.599	193.449	0.396933	94.4179	312.057	101.157	346.181	18.7006	62.8271	99.3413	2990.48	10651	23111.3	1254.7	2335.26	1169.98	2392.12	20.5293	13.9571	3.83545	3443.66	1.85396	12070.7	14971.3	3198.68	906.328	369.94	6.59036	0.668143	81.0753	64.6542	0	79395.5	0.456982	6.27511	5.54995	5.43589	3.20766
	4745	72.0937	56.9837	744.586	733.259	9.66727	113.799	15.2685	97.9437	613.673	422.534	757.036	184.893	0.229721	84.8911	307.35	84.4667	326.511	19.2809	56.3237	100.863	3033.51	10693.1	22889.9	1249.07	2295.44	1124.56	2329.67	20.4278	13.8758	4.03068	2756.01	2.01255	11896	14878.5	3260.98	1033.99	207.111	7.27505	0.659142	88.88	62.1554	0	84005	0.440122	6.1914	5.11069	4.60143	3.0178
	5110	74.7091	55.7505	690.309	629.835	9.15108	114.048	15.0463	84.7353	607.65	423.115	751.389	177.348	0.13612	76.2278	301.899	76.965	307.655	19.7794	50.5523	102.429	3016.77	10718.1	22756.4	1245.08	2293.75	1159.51	2283.9	20.334	13.7875	204.835	5542.51	3.00185	11725.8	14833.9	3339.54	560.696	124.604	4.83927	0.588756	59.5868	70.2922	0	85246.4	0.456089	6.05741	4.73815	3.95241	2.85666
	5475	77.0279	54.8095	648.28	553.137	8.7308	111.973	14.9332	76.8063	602.508	419.433	748.942	171.316	0.079677	68.8169	293.569	73.9959	290.362	20.2405	45.1039	104.146	3073.94	10805.6	22639	1238.48	2254.7	1129.79	2265.7	20.2735	13.7097	4.19109	2785.41	1.59532	11558.1	14775.2	3406.9	1066.23	104.908	7.27371	0.671187	89.9874	63.0873	0	90285.9	0.470245	5.95517	4.44966	3.47111	2.72546
	5840	78.1781	54.1639	615.849	497.112	8.37787	110.341	14.8761	72.0174	598.25	417.279	749.471	166.55	0.046354	62.7424	285.947	72.6604	273.306	20.692	40.7076	106.079	3120.25	10859.5	22429.5	1238.15	2223.55	1114.7	2246.73	20.1685	13.6261	5.55332	2642.7	1.62068	11397.4	14697.8	3463.21	1091.74	91.6832	7.71673	0.69101	94.3938	64.3734	0	94415.2	0.477267	5.88503	4.22706	3.11953	2.61529
	6205	87.5548	53.5809	591.987	458.56	8.0931	105.128	14.8633	69.0756	595.012	410.264	750.691	162.958	0.026768	57.9169	275.063	71.7554	257.681	21.1182	36.4744	108.137	3174.75	10937.6	22489.8	1236.82	2227.63	1202.53	2250.54	20.1429	13.5522	5.91113	3587.23	2.83451	11248.6	14749.2	3564.25	710.423	74.4447	5.49598	0.556237	67.0832	62.7369	0	95721.5	0.53451	5.82168	4.06328	2.8776	2.5264
	6570	85.6393	53.131	575.552	433.438	7.85765	100.411	14.9058	67.2908	593.045	405.224	752.874	160.505	0.015514	54.3608	266.401	70.6914	243.502	21.5079	33.5078	110.359	3228.57	10999.7	22385.7	1238	2198.92	1190.25	2261.13	20.0302	13.4721	6.97499	2848.1	1.78482	11101.8	14619.6	3601.78	1007.4	60.062	7.46122	0.691749	91.1461	65.6562	0	99602	0.522816	5.77279	3.95047	2.71996	2.4529
	6935	84.4781	52.4401	564.003	419.272	7.63303	89.8768	14.9515	66.1439	591.609	395.8	753.385	159.491	0.009028	52.0067	254.349	69.4425	228.654	21.8587	30.8855	112.615	3281.52	11052.8	22170.6	1239.71	2168.35	1170.48	2265.7	19.8769	13.3853	11.2662	2250.5	1.68259	10958.3	14479.3	3634.57	1223.87	46.253	8.74857	0.739652	106.163	66.0275	0	103867	0.515727	5.69773	3.87121	2.63106	2.38278
	7300	88.0087	51.4636	555.492	414.195	7.44019	82.5754	14.9809	65.3008	590.641	389.814	750.974	159.023	0.005523	50.038	249.443	67.982	214.81	22.1528	28.8928	114.938	3348.1	11153.8	22286.9	1237.04	2163.55	1294.66	2296.14	19.798	13.3081	14.6246	3000.13	2.08379	10824.3	14474.5	3695.82	947.636	36.5487	7.26038	0.660921	87.9321	69.737	0	103888	0.537281	5.59163	3.81279	2.5992	2.32258
	7665	82.5566	50.4579	547.281	410.938	7.27008	77.5023	15.0032	64.6528	589.433	383.325	747.835	158.553	0.004836	48.2622	245.037	66.3894	202.439	22.3871	27.1793	117.409	3413.87	11236.1	22081.8	1234.79	2133.86	1276.77	2319.42	19.6573	13.2232	26.6272	2603.64	1.41485	10688	14331	3722.86	1156.15	30.519	7.93181	0.667796	95.7473	67.2586	0	107302	0.503997	5.48235	3.75643	2.57876	2.26948
	8030	78.5473	49.363	539.882	407.521	7.09002	76.1228	15.0132	64.141	587.235	377.121	742.843	158.078	0.005153	46.7107	241.309	64.968	188.359	22.5619	25.7545	119.847	3419.83	11305	21941.3	1231.07	2104.82	1278.52	2337.67	19.5223	13.1341	53.7809	2186.5	1.30671	10556.8	14227.7	3758.25	1244.19	26.5036	8.13598	0.688755	97.9485	67.5253	0	110000	0.47952	5.36339	3.70565	2.55732	2.21327
	8395	75.7718	48.9504	533.184	404.211	6.93871	75.6113	15.0597	63.8716	587.892	372.092	742.004	157.77	0.005777	45.3915	238.716	63.8782	176.55	22.7415	24.6834	122.519	3480.24	11365.6	21756.8	1240.94	2077.71	1248.38	2339.14	19.3827	13.0465	136.603	2604.13	1.88684	10428.8	14121.9	3788.21	1198.75	23.7935	8.71136	0.729765	105.239	73.1967	0	112344	0.462576	5.31857	3.65967	2.53655	2.16603
	8760	74.3884	47.9789	526.642	401.141	6.80388	75.257	15.0743	63.5752	588.571	367.437	736.787	157.51	0.006557	44.2219	236.51	63.1359	166.034	22.8073	23.7784	125.217	3534.95	11448.3	21565.7	1240.12	2051.16	1229.57	2342.56	19.2738	12.9603	321.69	2006.11	1.34768	10306.1	14030.3	3820.24	1253.19	21.8005	8.52749	0.673739	102.566	69.8659	0	115347	0.454131	5.213	3.61477	2.51728	2.12394
	9125	73.8959	46.93	520.062	398.065	6.67208	75.0117	15.0694	63.3583	586.564	363.292	730.657	157.332	0.007409	43.1809	234.527	62.5428	155.113	22.7933	23.0357	127.875	3608	11540	21372.4	1237.86	2025.59	1206.83	2338.05	19.1598	12.8729	662.059	2796.76	1.07447	10188.7	13956.8	3853.7	1035.52	20.0471	8.43907	0.752397	102.945	75.3204	0	117052	0.451124	5.09905	3.56961	2.49798	2.0828
	9490	75.5051	46.1261	513.246	395.167	6.55914	74.8489	15.0652	63.2763	583.073	360.037	726.621	157.269	0.008311	42.2694	233.024	62.0555	149.474	22.7485	22.4742	130.737	3683.16	11640.4	21259.4	1231.12	2005.19	1202	2324.98	19.0887	12.7909	1032.03	2752.41	1.6092	10079	13923.7	3893.12	1022.92	18.6829	8.40223	0.774395	102.086	77.2972	0	118506	0.460949	5.0117	3.52282	2.4798	2.04754
	9855	75.9065	45.3197	506.332	392.36	6.45915	74.7364	15.0703	63.2794	577.862	357.789	724.968	157.238	0.009295	41.4665	231.78	61.4932	144.814	22.7139	22.0333	133.508	3757.73	11732.8	21114	1224.34	1983.63	1193.32	2310.32	19.0079	12.7092	1474.53	1766.68	1.21018	9968.06	13865.1	3923.51	1247.76	17.6235	8.42021	0.691122	101.386	74.1947	0	120865	0.463399	4.92408	3.47536	2.46218	2.01633
	10220	75.0361	44.8541	499.609	389.779	6.36067	74.6502	15.1012	63.3928	572.671	356.576	727.003	157.306	0.008549	40.7055	231.055	60.6404	141.74	22.7146	21.6997	136.513	3826.8	11803	20934.2	1226.9	1962.46	1179.8	2293.36	18.9002	12.6252	1978.19	1627.58	1.4862	9856.91	13780.1	3950.01	1425.15	16.8016	9.71467	0.758964	116.298	79.3628	0	123037	0.458085	4.87349	3.42922	2.44598	1.98559
	10585	121.162	44.2735	495.424	389.499	6.33583	74.6056	15.1387	63.5915	569.592	355.945	729.409	157.399	0.007585	40.2683	230.665	59.8393	139.303	22.7231	21.3686	139.618	3902.88	11892.9	20811.1	1258.07	1949.81	1176.9	2279.33	18.8348	12.5453	3338.58	1703.13	1.43714	9753.91	13764.2	3991.47	1259.15	16.3366	8.17687	0.67574	97.8949	80.8853	0	123971	0.739676	4.81041	3.40049	2.44423	1.97784
	10950	136.067	43.6532	491.515	389.188	6.31585	74.5602	15.1811	63.8058	568.036	355.382	731.652	157.51	0.008124	39.9435	230.337	58.8173	137.597	22.7473	21.0662	142.82	3984.32	11999.8	21194.7	1261.27	1963.22	1317.48	2274.93	18.7831	12.4673	3345.23	6631.45	3.05485	9669.76	13822.8	4045.51	543.135	15.318	5.70103	0.992313	69.9763	108.96	0	119042	0.83067	4.74301	3.37366	2.44227	1.9716
	11315	129.036	43.0523	487.052	388.483	6.2627	74.5517	15.2543	64.1613	568.161	355.108	734.907	157.662	0.008989	39.5278	229.884	57.5936	136.538	22.7893	20.8145	146.15	4077.07	12132.3	21250	1249.69	1947.82	1325.98	2306.32	18.9071	12.3996	3425.38	1947.76	1.06264	9592.33	13991.5	4109.71	1109.32	14.9168	7.9816	0.731165	96.2644	85.2036	0	123088	0.787747	4.67772	3.34303	2.43785	1.95501
	11680	124.862	42.4891	482.203	387.523	6.19641	74.5166	15.3125	64.3737	565.984	354.71	737.496	157.83	0.008113	39.0821	229.398	56.2078	135.999	22.814	20.5938	149.283	4162.91	12229.1	21182.8	1244.65	1929.34	1330.39	2324.27	18.8434	12.3241	4240.55	1500.42	0.982607	9502.97	13948.9	4142.25	1202.84	14.9606	8.81784	0.707298	105.31	85.1894	0	124773	0.762268	4.61653	3.30974	2.43183	1.93431
	12045	173.872	41.8889	478.721	387.716	6.16613	74.5927	15.3634	64.5102	562.907	354.414	738.822	158.017	0.007253	38.92	228.873	55.0796	135.761	22.8687	20.3682	152.469	4246.74	12316.4	21086.9	1277.5	1910.26	1315.18	2327.87	18.8136	12.2475	6397.76	1219.85	0.877552	9457.99	13952.1	4183.2	1138.47	15.1892	8.35764	0.678031	99.6693	89.1713	0	125777	1.06147	4.55131	3.28585	2.43304	1.92486
	12410	193.002	41.4314	475.716	388.414	6.16722	75.0737	15.4259	64.7781	563.547	354.395	741.216	158.338	0.007819	38.929	228.385	54.1972	136.191	22.9414	20.1922	155.888	4345.09	12449.1	21256.2	1277.9	1949.74	1385.99	2325.48	18.945	12.1811	7034.59	1983.93	1.22803	9474.58	14195.9	4273.46	750.273	14.6571	6.11308	0.67264	74.1931	92.1333	0	124356	1.17825	4.50161	3.26522	2.43742	1.9252
	12775	194.003	40.753	472.183	388.634	6.16732	75.8458	15.461	65.0218	563.609	354.118	741.508	158.686	0.008702	38.7979	227.532	53.3841	136.641	22.9609	20.0151	159.247	4418.89	12544.6	21234.3	1265.9	1928.49	1390.83	2320.68	18.9765	12.11	7557.03	982.554	0.701051	9446.35	14189	4326.11	1187.54	14.9341	8.43032	0.68182	99.9205	88.5274	0	126080	1.18436	4.4279	3.24097	2.4388	1.92523
	13140	227.244	40.3938	469.428	389.081	6.1864	76.7071	15.5196	65.2803	563.999	354.045	743.846	159.088	0.008397	38.8219	226.961	52.935	137.651	22.9887	19.8947	162.892	4512.32	12646.3	21278.2	1293.67	1927.89	1392.64	2313.76	19.0137	12.0414	9083.48	1236.06	0.805272	9393.78	14269	4408.25	1026.09	14.9143	7.77069	0.658682	92.8177	93.2493	0	126072	1.3873	4.38887	3.22206	2.4416	1.93119
	13505	245.907	40.0088	466.763	389.142	6.199	77.3786	15.565	65.522	562.847	353.96	744.796	159.325	0.007222	38.7807	226.401	52.4442	138.46	22.9942	19.7867	166.148	3864.56	12134.1	21386	1292.22	1922.73	1484.1	2307.87	19.0826	11.8939	9855.01	1861.95	1.06312	9330.85	14471.8	4518.55	747.597	14.7427	6.43246	0.623383	77.0641	92.842	0	125409	1.50123	4.34704	3.20377	2.44199	1.93512
	13870	273.357	39.7262	464.195	389.073	6.20207	77.8633	15.6055	65.8348	560.776	354.09	745.356	159.339	0.007738	38.7537	225.859	52.1267	139.16	22.9917	19.694	169.456	3949.49	12225.2	21423.1	1302.06	1899.77	1474.84	2303.05	19.1757	11.8159	10849.8	1985.26	1.0632	9247.62	14555.9	4631.71	803.024	15.3235	7.10708	0.688406	85.2103	99.2552	0	126307	1.66881	4.31634	3.18614	2.44155	1.93608
	14235	306.377	39.6529	462.088	388.936	6.20329	78.2245	15.65	66.1038	559.855	354.375	747.834	159.458	0.008523	38.7433	225.56	51.8778	140.035	23.019	19.6475	172.989	3998.87	12285.4	21496.4	1303.48	1889	1540.57	2290.92	19.2082	11.7505	12078.2	3822.57	1.89553	9168.27	14603.7	4755.49	879.37	15.9464	15.3055	1.47963	181.882	129.382	0	125149	1.87039	4.30837	3.17168	2.44069	1.93646
	14600	337.581	39.4925	459.726	388.488	6.19684	78.4376	15.6839	66.3479	558.984	354.669	749.292	159.513	0.009521	38.8657	225.276	51.7426	140.714	23.0551	19.5958	176.593	3845.49	12301.4	21607	1296.62	1871.78	1551.12	2291.68	19.2617	11.6764	12924.4	1386.57	0.818375	9090.85	14658.8	4890.67	1132.13	16.2905	9.43462	0.754421	111.749	108.174	0	127194	2.06088	4.29094	3.15547	2.43788	1.93445
	14965	374.608	39.1517	457.788	388.119	6.18367	78.4656	15.6965	66.4149	558.051	354.681	748.127	159.44	0.008622	38.9442	225.053	51.6447	141.079	23.0859	19.5374	180.1	3492.61	12270.6	21745.8	1296.7	1860.35	1553.98	2287.05	19.1931	11.5868	14049.7	3264.36	1.5121	9022.6	14560.5	4990.56	2889.26	16.359	16.0243	2.9702	212.976	174.682	0	123382	2.28693	4.25391	3.14217	2.43556	1.93033
	15330	421.135	38.8664	456.377	387.705	6.17064	78.3843	15.7128	66.56	557.38	354.621	747.168	159.314	0.007876	39.1624	224.777	52.0438	141.45	23.0945	19.4882	183.657	3569.45	12405.4	22358.7	1283.7	1882.28	1669.65	2312.44	19.3368	11.5322	15100.7	1974.77	0.955856	8954.14	14795.4	5117.83	861.93	15.89	7.8817	0.798986	95.0545	114.369	0	122791	2.57097	4.22291	3.13248	2.43297	1.92627
	15695	467.441	38.7374	455.292	387.348	6.16038	78.1536	15.7253	66.6231	556.704	354.625	747.613	159.26	0.008467	39.3336	224.779	52.3448	141.911	23.1311	19.4754	186.91	3649.49	12483.7	22449	1287.18	1863.98	1662.48	2326.88	19.216	11.4716	16167.3	1790.59	0.889377	8863.72	14627.8	5154.04	996.99	16.2173	8.41183	0.742214	99.5189	115.928	0	123339	2.85366	4.2089	3.12504	2.43073	1.92306
	16060	507.806	38.6254	454.597	387.046	6.15359	77.8536	15.7332	66.6162	556.679	354.587	748.087	159.228	0.009348	39.567	224.998	52.8288	142.368	23.1566	19.4651	190.249	3676.46	12556.4	22602.3	1286.49	1881.9	1658.42	2346.91	19.1228	11.4085	17520.9	1506.84	0.882041	8789.62	14550.2	5203.89	938.575	16.3056	7.89746	0.703332	93.8666	114.879	0	124256	3.10008	4.19674	3.12027	2.42883	1.92095
	16425	549.489	38.5074	454.429	386.927	6.1492	77.4863	15.7451	66.6005	556.949	354.433	748.47	159.195	0.008508	39.7746	225.255	53.5488	142.731	23.1513	19.4417	193.635	3582.57	12594.2	23453.9	1289.7	1882.74	1824.33	2360.43	19.0414	11.3378	17758.3	5872.04	2.42088	8725.42	14519.2	5246.55	704.812	16.571	11.067	1.50203	137.468	146.827	0	116535	3.35456	4.18391	3.11911	2.42808	1.91957
	16790	586.47	38.4129	454.281	386.759	6.14544	77.0868	15.7563	66.6652	556.763	354.348	749.458	159.174	0.007669	40.0145	225.444	54.2022	143.142	23.1294	19.4396	197.24	3644.17	12700.2	23770.5	1280.82	1865.11	1838.8	2421.46	19.1168	11.2854	18397.2	1404.2	1.08581	8646.9	14621.8	5302.8	1031.88	16.349	8.08069	0.693391	96.2321	112.978	0	118993	3.58032	4.17365	3.1181	2.42703	1.9184
	17155	624.621	38.4278	454.396	386.678	6.14323	76.6173	15.7632	66.6708	557.124	354.126	751.239	159.207	0.008152	40.1821	225.759	54.6539	143.654	23.1521	19.4564	201.053	3722.84	12766.9	23877	1287.8	1845.63	1816.48	2455.64	19.0106	11.2286	19042	1246.33	0.95085	8566.66	14498.7	5319.05	2286.09	16.8415	11.6662	1.17707	141.447	130.679	0	119360	3.81323	4.17526	3.11889	2.42652	1.91771
	17520	654.754	38.3133	454.847	386.862	6.15043	76.1194	15.7408	66.5678	555.661	353.708	749.409	158.986	0.008762	40.3989	226.164	55.3093	143.846	23.1575	19.4558	204.774	2667.27	11297.8	24049.3	1290.43	1866.36	1809.73	2474.31	18.9886	10.9804	19697	1268.64	0.913722	8560.39	14560.4	5368.33	1211.76	16.4888	9.24226	0.747862	108.793	121.986	0	120306	3.99718	4.16282	3.12198	2.42768	1.91996
	17885	673.131	38.4202	455.171	387.073	6.15167	75.5889	15.7128	66.5352	553.956	353.491	745.089	158.337	0.008213	40.7083	226.534	55.8742	144.137	23.1795	19.4514	207.982	2386.83	10943.2	25023.7	1291.12	1857.27	1956.61	2489.16	19.1049	10.832	19633.7	4603.75	2.15504	8555.11	14870.6	5474.55	337.604	15.8121	3.90209	0.442658	45.4078	108.256	0	113955	4.10938	4.17443	3.12421	2.429	1.92035
	18250	682.53	38.5316	455.321	387	6.149	75.0532	15.6914	66.6528	553.759	353.399	740.631	157.669	0.006962	40.885	226.492	56.2134	144.3	23.1974	19.4405	211.198	1568.67	9291.27	25354.7	1279.2	1835.18	1929.47	2529.07	19.3339	10.557	19805.9	1779.37	1.5665	8531.53	15125	5553.89	901.676	15.774	8.37645	0.709479	98.6321	123.867	0	115917	4.16675	4.18654	3.12524	2.42854	1.91951
	18615	702.768	39.0244	456.056	387.6	6.15118	74.4869	15.6801	66.713	555.193	353.406	734.157	156.671	0.007385	41.0822	226.797	56.5899	144.753	23.2263	19.449	214.68	1314.22	8728.38	25582	1280.56	1812.43	1891.98	2541.76	19.493	10.3044	20364.5	1882.22	1.36154	8505.58	15250.6	5628.67	857.259	15.5516	7.188	0.669745	84.8439	119.702	0	117753	4.2903	4.24009	3.13028	2.43231	1.92019
	18980	704.204	39.3699	456.434	387.889	6.1546	73.9484	15.6506	66.71	555.751	353.33	727.035	155.759	0.008111	41.2344	226.796	56.9087	144.924	23.1839	19.4353	218.081	1048.91	8204.87	25989.6	1271.48	1823.75	1901.03	2539.57	19.6838	10.1393	20498.7	1948.58	1.59149	8460.02	15514	5719.48	763.441	15.3679	9.23039	0.729825	107.353	132.794	0	118074	4.29907	4.27762	3.13287	2.43412	1.92126
	19345	720.861	39.8488	456.651	388.044	6.1537	73.3888	15.6283	66.7409	555.418	353.317	722.817	155.023	0.009066	41.3331	226.919	57.088	145.226	23.1153	19.4297	221.773	1061.36	8279.79	26272.8	1269.45	1800.42	1865.96	2531.09	19.7098	10.0914	20670.8	1912.47	1.46766	8389.09	15482.5	5747.47	862.507	15.0932	7.26586	0.708174	85.4021	125.301	0	120278	4.40076	4.32966	3.13436	2.43509	1.92098
	19710	716.584	40.1421	456.643	387.964	6.15033	72.8112	15.5934	66.637	554.486	353.2	717.541	154.317	0.008425	41.3626	226.848	57.1095	145.218	23.0411	19.4057	225.378	704.433	7081.93	26628.2	1269.35	1779.04	1835.05	2508.72	19.7474	9.85037	20197.9	2343.83	1.38265	8384.68	15592.9	5813.86	1479.19	14.9211	10.3518	0.972018	127.535	145.208	0	121566	4.37464	4.36152	3.13431	2.43459	1.91993
	20074.5	714.654	40.7914	457.049	388.148	6.15196	72.23	15.5847	66.6418	554.319	353.361	713.83	153.617	0.007524	41.4505	226.966	57.2617	145.584	22.9905	19.4065	228.75	729.203	7208.53	28063.7	1263.43	1779.04	2010.48	2549.38	20.0702	9.79046	20480.6	2360.1	1.6908	8316.69	16074.5	5903.89	611.552	14.6874	6.30237	0.671402	73.6433	126.453	0	116316	4.36286	4.43207	3.13709	2.43575	1.92044
Full Regulations
	0	163.804	9.20369	145.692	159.355	3.20342	101.044	4.00792	63.0406	89.5154	165.653	259.752	55.3802	0.85031	9.58446	77.0309	39.1596	103.822	3.54591	9.29063	69.4644	2624.44	10575	27838.5	1841.96	3023.88	7721.22	1823.99	25.469	17.9517	1017.79	785.199	1727.46	14182	14840.9	2183.71	349.207	149.66	48.9198	4.49054	5589.68	22358.7	0	3991.63	1	1	1	1	1
	365	168.794	16.8446	271.337	321.741	4.23899	91.2898	6.04541	85.7945	130.459	183.062	386.787	73.2801	0.798231	19.6044	116.555	68.8277	149.774	5.26226	13.6578	74.9319	2625.18	10491.9	27044.1	2330.41	3115.6	6478.43	4103.38	18.2901	14.9476	104.433	2907.67	4255.65	14051	15685	2513.3	912.744	3344.65	7.62696	0.281137	91.1904	54.7581	0	16134.6	1.03047	1.8302	1.8624	2.01902	1.32327
	730	173.029	23.7793	418.29	512.071	5.11637	92.4782	7.75027	118.545	187.001	208.101	475.226	93.5472	0.831562	32.3076	152.197	107.289	188.974	6.9603	18.6932	79.404	2636.57	10431.3	26177.7	1919.2	2986.5	4597.51	4952.9	20.6762	14.8312	56.2677	3317.22	3056.82	13891.5	15682.2	2612.17	847.356	2352.13	6.89064	0.401523	82.7414	60.8863	0	22549.2	1.05632	2.58367	2.87106	3.2134	1.59716
	1095	172.19	30.0015	575.912	715.021	5.88166	94.4569	9.54778	149.927	258.629	234.949	540.153	114.983	0.875706	47.2357	183.984	151.933	222.833	8.57494	24.3314	82.7948	2659.69	10411	25552.2	1670.25	2877.45	3431.6	4646.36	20.9255	14.722	40.0116	3103.19	1257.15	13722.6	15565.6	2666.9	1008.35	1900.98	7.4676	0.494406	90.6369	60.6744	0	30543.5	1.0512	3.25973	3.95295	4.48698	1.83606
	1460	177.441	37.9327	737.685	921.079	6.61727	96.617	11.863	173.853	340.246	262.871	611.744	137.835	0.920905	64.0879	211.371	197.673	253.239	10.0847	30.5869	85.504	2686.81	10406.3	25093.1	1531.16	2794.05	2728.58	4136.68	20.9359	14.6232	32.2064	4482.06	546.55	13548.8	15463.7	2722.59	730.598	1620.41	6.13688	0.480759	74.6727	60.3845	0	36878.6	1.08325	4.12147	5.06333	5.78005	2.06569
	1825	183.812	45.4372	890.499	1116.07	7.39626	98.9305	13.9465	194.71	427.184	290.331	676.515	160.852	0.980791	82.0312	235.514	234.744	281.283	11.3894	37.3919	87.8292	2718.58	10417.4	24756	1445.1	2709.31	2234.74	3701.76	20.9222	14.5306	19.3594	3841.17	161.068	13371.4	15373.4	2778.33	803.257	1406.76	6.09304	0.518382	74.513	59.0975	0	43608.7	1.12215	4.93685	6.11221	7.0037	2.30887
	2190	186.698	51.5027	1018.32	1283.56	8.21453	101.519	15.5242	211.483	513.436	317.58	725.374	182.189	1.05242	99.7471	256.586	257.938	306.822	12.527	44.7031	89.8573	2751.71	10429.1	24415.7	1386.97	2630.35	1883.91	3351.52	20.8789	14.4397	13.4219	3267.54	34.4813	13187.3	15281.9	2823.67	970.734	1274.41	6.76032	0.571247	83.6455	59.2399	0	50470.3	1.13977	5.59587	6.98953	8.05472	2.5643
	2555	186.262	56.0502	1107.44	1407.23	9.0767	103.998	16.6946	223.9	591.01	343.253	757.278	200.173	1.15407	115.569	275.103	268.792	329.779	13.5795	52.3871	91.6599	2787.44	10450.4	24168.4	1346.4	2567.96	1660.95	3082.81	20.8289	14.3532	9.2151	3604.25	9.88666	13000.7	15220.3	2875.21	856.92	1123.96	6.35683	0.568005	77.9924	60.2426	0	55672.8	1.13711	6.08997	7.60125	8.8308	2.83344
	2920	170.816	58.6273	1139.65	1460.89	9.96247	106.663	17.4007	232.782	645.795	368.703	773.629	212.539	1.26789	126.328	291.466	264.213	350.672	14.6821	60.3034	93.3026	2824.53	10472.5	23889.3	1316.27	2503.68	1473	2871.26	20.7583	14.2677	7.23515	3091	2.88032	12811.3	15148.6	2920.22	970.381	1024.32	6.83643	0.585143	83.5474	60.4588	0	61879.1	1.04281	6.36998	7.82236	9.16754	3.10995
	3285	136.097	59.1715	1090.03	1410.31	10.8515	108.843	17.4552	238.11	652.804	391.837	775.701	216.418	1.39104	127.313	304.876	237.021	368.943	15.8942	68.326	94.8484	2863.09	10503.4	23662.6	1295.25	2469.4	1386.14	2702.24	20.6917	14.1849	6.70252	6466.39	3.63815	12623.3	15117.9	2976.67	541.126	898.543	4.95941	1.00383	63.8051	94.7283	0	64090.4	0.830852	6.42911	7.48178	8.85012	3.38747
	3650	80.7973	58.4524	923.825	1210.21	11.7792	111.144	16.7662	239.643	652.508	414.889	765.325	208.358	1.52537	111.555	315.89	182.154	383.884	17.2533	76.2479	96.3657	2907.14	10559.6	23535.8	1276.54	2419.92	1287.41	2579.81	20.6737	14.1127	4.24956	4086.37	2.16954	12435.2	15123.4	3044.95	794.548	767.284	6.11317	0.67906	75.5208	69.6719	0	70156.9	0.493256	6.35097	6.34095	7.59443	3.67708
	4015	78.7716	58.3412	884.526	1133.66	11.9872	112.458	16.4997	210.477	628.716	425.305	768.316	207.167	1.43361	108.723	317.288	142.682	385.588	18.0335	79.8733	97.7931	2951.7	10609.2	23346.8	1262.91	2374.64	1212.2	2478.48	20.6568	14.0361	3.58069	3077.32	1.66823	12249.3	15144.3	3131.46	936.229	608.572	6.58014	0.606097	80.8964	61.7469	0	75023.8	0.480889	6.33889	6.07121	7.11407	3.742
	4380	75.8327	57.7274	832.44	1058.48	12.1767	113.926	16.0388	188.208	621.566	435.727	767.2	204.371	1.34347	104.119	317.465	113.306	385.163	18.696	83.0127	99.1644	2990.47	10650.8	23111.3	1254.31	2335.3	1163.82	2397.41	20.5866	13.9547	3.91426	3581.71	1.88675	12066.7	15090.8	3197.78	916.601	371.284	6.71748	0.710979	82.9293	66.9226	0	79482.2	0.462948	6.2722	5.71371	6.64231	3.80116
	4745	73.8171	56.9247	773.375	982.616	12.3746	113.875	15.6024	171.151	615.669	442.33	764.277	199.702	1.24359	97.8106	314.796	96.8964	381.782	19.2712	85.2871	100.444	3033.56	10694.1	22898.4	1247.84	2296.04	1113.83	2334.12	20.5148	13.8726	4.09663	2896.65	2.06033	11888.7	15055	3261.68	1012.33	207.377	7.18275	0.652087	87.7265	63.4692	0	84210.2	0.450643	6.18499	5.30829	6.16622	3.86293
	5110	73.0531	55.6451	720.028	916.049	12.5797	114.097	15.2965	157.704	609.803	448.949	759.729	195.07	1.1528	91.1888	310.806	88.4876	376.884	19.7617	87.3369	101.658	3014.81	10707.5	22643.6	1242.76	2259.17	1069.21	2281.58	20.4357	13.7805	5.46038	3626.56	1.9314	11713.5	15003	3313.81	2604.61	136.091	12.6899	2.15656	165.572	97.3739	0	86726.6	0.445979	6.04596	4.94213	5.74849	3.92697
	5475	79.1566	54.6689	676.302	862.369	12.8243	112.014	15.053	146.983	604.62	450.503	758.036	191.059	1.06958	84.7993	303.247	83.8712	371.23	20.2118	88.224	102.909	3072.05	10801.3	22648.3	1236.02	2261.33	1113.19	2261.05	20.4099	13.7032	4.83548	3370	1.83459	11544.1	15039	3403.68	877.264	104.082	6.872	0.645078	83.3583	68.0011	0	90596.8	0.48324	5.9399	4.642	5.41163	4.00331
	5840	80.603	53.9846	640.277	818.241	13.0805	110.331	14.8428	138.373	600.204	453.106	759.006	187.478	0.993941	78.8088	295.734	80.059	363.044	20.6471	89.3151	104.263	3119	10857.1	22439.1	1234.02	2229.31	1087.51	2240.38	20.3331	13.619	6.23252	3114.14	1.76107	11381.7	15001.9	3458.23	1065.23	91.178	7.89191	0.810919	97.1062	73.0119	0	94862.4	0.492071	5.86554	4.39474	5.13471	4.08329
	6205	82.3406	53.2995	611.712	783.498	13.3561	105.019	14.6656	131.393	596.622	449.651	760.549	184.4	0.925058	73.2788	284.036	76.0279	354.232	21.0585	88.6081	105.658	3167.71	10909.9	22322.6	1235.38	2216.89	1110.67	2223.62	20.2679	13.5354	9.69707	6329.27	3.7309	11229.2	14975.3	3518.47	1388.23	74.0139	17.4842	3.28167	225.141	132.064	0	95054.9	0.502678	5.79111	4.19867	4.91669	4.16934
	6570	87.7355	52.8281	590.593	758.399	13.6788	100.265	14.572	125.786	594.467	447.828	763.206	181.95	0.860862	68.4626	274.381	71.67	344.792	21.4303	89.2537	107.114	3221.89	10978.9	22301.8	1232.86	2198.72	1121.33	2232.42	20.2565	13.4591	10.0904	3336.98	1.99089	11082.4	15020.1	3592.09	960.976	62.0487	7.51379	0.798316	92.0128	76.1235	0	101106	0.535613	5.73989	4.05372	4.75919	4.27006
	6935	87.6945	52.1142	574.384	740.207	13.9627	89.6766	14.5135	121.231	592.975	440.288	764.098	180.17	0.796213	64.54	260.631	67.0462	331.918	21.7593	89.0576	108.52	3275.98	11035.8	22113.9	1233.37	2171.49	1101.19	2233.48	20.1472	13.3728	15.6724	2755.91	1.82553	10936.6	14929	3626.74	1125.51	47.7078	8.41756	0.773028	102.483	70.9683	0	105324	0.535363	5.66232	3.94246	4.64503	4.35869
	7300	93.0351	51.0641	562.713	727.697	14.2576	82.31	14.4973	117.23	591.831	436.145	761.997	179.079	0.73688	61.0318	254.135	62.8175	318.302	22.0377	89.4992	109.92	3339.98	11127.5	22147.5	1232.46	2167.37	1198.23	2242.81	20.0662	13.2913	25.7956	4635.44	2.90306	10797.8	14950.9	3691.42	658.848	37.0681	5.68888	0.630893	69.7661	70.8729	0	105328	0.567966	5.54823	3.86235	4.56652	4.45076
	7665	89.3943	50.055	552.731	717.764	14.5726	77.1983	14.5108	113.77	590.911	430.873	759.293	178.335	0.682253	58.1127	247.986	59.3916	304.726	22.2543	89.4342	111.371	3409.95	11226.1	22024.9	1226.98	2136.53	1167.63	2264.67	20.0065	13.211	36.577	2316.19	1.37098	10662.9	14882.5	3727.23	1114.76	31.5592	7.41734	0.62231	89.2722	65.7823	0	109515	0.54574	5.43858	3.79384	4.50419	4.54908
	8030	85.5591	48.9424	544.637	709.147	14.8115	75.7701	14.5521	110.551	589.118	425.348	754.64	177.597	0.629231	55.5999	242.425	56.7698	286.137	22.416	89.2064	112.745	3417.09	11301.9	21923.2	1224.3	2115.65	1199.02	2278.55	19.8971	13.1213	74.9709	3013.71	1.67461	10527.6	14825.5	3765.1	968.826	27.1205	6.95673	0.663632	84.5366	70.6087	0	111077	0.522326	5.3177	3.73828	4.45011	4.62364
	8395	81.022	48.5326	537.985	701.483	15.0601	75.2112	14.6407	107.754	590.382	420.511	754.219	177.035	0.580919	53.4806	237.808	54.8473	268.617	22.5835	89.0177	114.273	3478.82	11368.6	21744.3	1225.67	2090.64	1178.75	2284.96	19.7908	13.0343	159.5	2514.18	1.86968	10397.3	14744.6	3792.26	1276.35	24.4814	9.18084	0.774757	111.201	75.3771	0	113991	0.494628	5.27317	3.69262	4.40202	4.70127
	8760	77.9592	47.5723	531.886	694.814	15.3076	74.8061	14.6928	104.813	591.636	415.567	749.05	176.51	0.53672	51.5281	233.599	53.4117	251.752	22.6373	88.6813	115.763	3531.43	11441.7	21514.4	1226.61	2061.62	1145.94	2290.93	19.687	12.9451	391.894	2309.52	1.42435	10268.5	14665.3	3817.47	1767.05	22.463	12.3505	1.00859	153.354	78.9869	0	116511	0.47593	5.16883	3.65076	4.36017	4.77852
	9125	76.959	46.5355	526.042	688.43	15.5259	74.5081	14.724	102.111	590.247	410.787	742.696	176.132	0.493983	49.8534	229.603	52.2241	232.279	22.6124	88.3136	117.169	3607.69	11537	21310.9	1226.76	2034.51	1118.82	2290.28	19.5976	12.8573	758.119	1894.67	0.925861	10147.2	14620	3848.5	1263.75	20.8219	8.71073	0.713456	105.11	74.3087	0	119702	0.469824	5.05618	3.61065	4.3201	4.84668
	9490	78.4568	45.7403	520.093	682.61	15.7552	74.2936	14.7632	99.7452	587.368	406.609	738.177	175.866	0.455553	48.3607	226.182	51.1041	221.068	22.5569	88.0718	118.71	3680.64	11629.5	21148.7	1223.35	2013.07	1100.58	2278.75	19.5321	12.7707	1183.39	2789.94	1.61839	10033	14612.3	3885.19	1035.08	19.4081	8.38593	0.781263	101.951	79.2456	0	120751	0.478968	4.96978	3.56981	4.28359	4.91823
	9855	81.9331	44.941	514.594	676.98	15.996	74.1445	14.8114	97.7272	582.8	403.188	735.358	175.665	0.421179	47.0568	223.184	49.9626	210.847	22.5121	87.914	120.129	3757.94	11733.5	21031.7	1217.03	1994.2	1092.55	2264.35	19.4923	12.6887	1621.54	2686.71	1.47296	9922.63	14624.9	3923.42	975.284	18.2663	7.31735	0.701057	88.8775	78.4706	0	121906	0.500191	4.88294	3.53207	4.24825	4.99342
	10220	82.0261	44.4788	509.362	672.094	16.1917	74.0226	14.9057	96.3603	578.285	400.88	737.384	175.644	0.387903	45.8748	220.665	48.7077	202.627	22.5007	87.9192	121.705	3828.56	11811.7	20857.4	1212.73	1974.3	1079.2	2247.7	19.4288	12.605	2110.63	1663.34	1.49939	9809.56	14593.9	3952.52	1364.15	17.3948	9.32186	0.758573	111.798	80.6893	0	124457	0.500758	4.83271	3.49616	4.2176	5.0545
	10585	85.1129	43.8983	504.566	667.696	16.3562	73.9234	15.001	95.0928	575.779	399.07	739.052	175.636	0.3588	44.7417	218.578	47.31	195.121	22.489	87.8686	123.316	3899.36	11882.4	20669.9	1215.71	1954	1062.7	2232.87	19.3594	12.5204	2628.65	1563.97	1.32971	9698.4	14563.8	3981.95	1461.41	16.6317	9.2913	0.739399	111.189	81.1331	0	126589	0.519602	4.76965	3.46324	4.18999	5.10586
	10950	128.901	43.2813	502.399	666.657	16.6594	73.8458	15.1137	93.8519	574.794	397.788	741.236	175.558	0.333209	44.0008	216.867	46.0051	188.497	22.5011	87.751	124.984	3978.55	11977.4	20539	1242.14	1942.35	1056	2221.24	19.3377	12.4399	3856.87	1610.61	1.14893	9605.44	14603	4025.3	1325.51	16.1568	8.91305	0.728398	106.981	86.3502	0	127925	0.786926	4.7026	3.44837	4.18347	5.20051
	11315	136.681	42.6836	500.325	665.467	16.7072	73.7583	15.2162	92.5824	575.133	396.544	743.543	175.486	0.305521	43.3856	215.385	44.4871	182.678	22.5322	87.603	126.684	4057.72	12064.6	20658.9	1245.8	1934.19	1084.62	2209.17	19.3029	12.3577	4212.54	3791.58	1.7664	9516.49	14614.7	4059.25	3839.43	16.0076	17.4472	2.85379	224.188	156.059	0	123684	0.834416	4.63766	3.43413	4.17601	5.21542
	11680	139.046	42.1289	497.687	663.759	16.6355	73.8423	15.3351	91.6949	573.586	395.877	747.159	175.552	0.282013	42.8954	213.936	42.94	177.718	22.5456	87.5006	128.276	4155.4	12215.3	21095.2	1232.71	1949.15	1236.28	2249.97	19.4966	12.2928	4803.1	2366.79	1.26646	9498.27	14954.6	4157.2	994.726	15.418	8.91217	1.24018	111.378	101.48	0	124537	0.848859	4.5774	3.41602	4.16529	5.19305
	12045	140.789	41.546	494.653	661.308	16.5432	74.1403	15.4564	90.8938	571.088	395.278	749.633	175.717	0.260832	42.3693	212.417	41.4668	173.45	22.5906	87.3115	129.898	4241.74	12307.8	21023.6	1221.46	1931.34	1234.57	2275.1	19.4993	12.2171	5971.28	1372.5	0.883837	9468.24	14956	4196.06	1062.04	15.404	8.07486	0.692759	96.6999	88.3613	0	126764	0.859498	4.51406	3.3952	4.14991	5.16422
	12410	200.547	41.095	492.669	660.961	16.5814	74.7971	15.5744	90.2714	572.038	394.813	752.074	176.018	0.241542	42.2811	211.006	40.474	169.901	22.6339	87.008	131.614	4326.95	12396.4	20939.2	1254.13	1920.41	1220.18	2276.39	19.5091	12.1402	8161.93	2725.61	1.61408	9455.74	14983.9	4244.3	3004.1	15.5836	13.3304	2.75223	175.61	150.494	0	123922	1.22431	4.46505	3.38158	4.14773	5.17616
	12775	226.979	40.4247	490.538	661.305	16.6925	75.6766	15.6737	89.8785	572.418	394.321	752.497	176.371	0.22399	42.4315	209.506	39.8695	166.939	22.6371	86.6855	133.34	4403.27	12500	20940.8	1248.26	1920.93	1242.02	2271.88	19.5662	12.0677	8713.44	1126.23	0.758009	9424.39	15067.6	4316.56	1132.06	15.6981	8.39261	0.710132	99.3634	95.6201	0	127617	1.38567	4.39223	3.36696	4.14989	5.21084
	13140	243.816	40.0818	488.435	660.917	16.8357	76.5032	15.7794	89.7284	573.349	394.107	755.378	176.803	0.207575	42.4349	208.268	39.3921	164.849	22.6581	86.4599	135.337	4504.22	12636.6	21158.7	1255.83	1961.05	1298.96	2274.02	19.794	12.0066	9345.09	1607.12	1.15094	9377.54	15462.7	4466.7	879.565	15.3172	7.86826	0.962551	95.8526	99.9716	0	126157	1.48846	4.35497	3.35252	4.14746	5.25554
	13505	263.236	39.7107	486.355	659.724	16.9773	77.0624	15.8615	89.4738	572.679	393.786	756.727	176.999	0.192263	42.3903	207.123	39.0042	162.924	22.6623	86.2732	136.975	3858.85	12123.9	21254.7	1242.28	1944.99	1308.81	2272.21	19.8448	11.8586	10487.7	1168.31	0.754149	9292	15522.9	4562.58	1079.53	15.4193	8.31254	0.703796	99.0392	97.5644	0	126098	1.60702	4.31465	3.33824	4.13997	5.29975
	13870	324.385	39.4298	484.938	659.902	17.1679	77.5106	15.9346	89.1716	570.919	393.726	757.249	176.945	0.178069	42.6213	206.106	38.9891	161.102	22.6594	86.216	138.679	3945.01	12232.2	21351.9	1276.99	1932.53	1342.26	2267.28	19.9758	11.7802	12285.7	1455.46	0.906331	9214.44	15723.3	4703.86	845.99	15.2117	6.98798	0.668911	83.3725	101.335	0	125252	1.98033	4.28413	3.32852	4.14108	5.35925
	14235	362.499	39.3606	483.674	660.124	17.3562	77.8285	16.016	89.0478	570.323	393.869	760.149	177.086	0.164751	42.8705	205.375	38.9103	159.743	22.6864	86.2131	140.56	3994.16	12294.8	21371.9	1281	1920.83	1327.18	2256.9	19.994	11.7118	12835.7	2946.35	1.43662	9127.95	15722	4820.46	1061.95	15.6747	11.9656	1.94427	150.608	138.127	0	125068	2.21301	4.27662	3.31984	4.14248	5.41803
	14600	394.455	39.194	482.488	659.768	17.5415	77.9929	16.0735	88.9054	569.6	393.995	761.525	177.165	0.152353	42.9998	204.803	38.8013	158.555	22.7296	86.1859	142.451	3840.48	12304	21403.9	1283.74	1902.21	1304.92	2246.92	19.9727	11.6316	13769.2	1777.81	1.11564	9051.57	15680.7	4925.89	2357.34	16.0132	13.4702	0.973288	158.078	133.402	0	126308	2.40809	4.25852	3.3117	4.14024	5.47588
	14965	432.076	38.8491	482.148	659.788	17.7293	77.9731	16.1079	88.7514	568.802	393.96	760.274	177.129	0.140765	43.2194	204.29	38.8161	157.187	22.7616	86.1448	144.302	3492.08	12276.5	21440.6	1298.51	1883.26	1292.45	2231.17	19.9137	11.5386	14942.5	1426.73	0.828376	8982.06	15601.6	4998.03	1140.34	15.9675	9.80425	1.01814	118.116	114.287	0	128399	2.63776	4.22103	3.30937	4.14037	5.53449
	15330	473.067	38.5542	481.815	659.697	17.9013	77.8629	16.1446	88.822	568.136	393.871	758.974	177.074	0.130048	43.4084	203.84	39.0608	156.019	22.7716	86.159	146.22	3568.45	12411.3	22059.2	1292.42	1915.35	1405.84	2240.13	20.054	11.4794	15905.8	1716.8	1.0576	8924.25	15911	5123.2	1303.63	15.944	8.41682	0.706477	103.962	106.387	0	123789	2.88801	4.18899	3.30708	4.1398	5.58818
	15695	521.891	38.4166	481.435	659.483	18.0637	77.5762	16.1914	89.0056	567.622	394.001	759.835	177.092	0.11994	43.6453	203.661	39.4074	155.108	22.8065	86.377	147.917	3650.67	12502.6	22245	1284.84	1901.92	1413.63	2254.21	19.9982	11.4193	16951.2	998.164	0.678316	8825.06	15784	5154.4	1151.05	15.8003	8.66378	0.711997	102.168	112.992	0	124083	3.18607	4.17405	3.30448	4.13846	5.6389
	16060	569.526	38.2942	481.092	659.016	18.203	77.2206	16.2199	88.9225	567.687	393.977	760.411	177.031	0.110491	43.8733	203.598	39.6748	154.307	22.8286	86.5191	149.687	3672.78	12549.6	22310.4	1291.59	1883.98	1401.98	2272.69	19.889	11.3504	17812.6	1146.22	0.721424	8741.63	15660.4	5181.91	1248.79	16.0545	9.62951	0.788168	114.136	120.393	0	125828	3.47688	4.16075	3.30212	4.13553	5.68237
	16425	609.731	38.1623	481.098	658.453	18.3409	76.8044	16.2463	88.675	567.992	393.843	760.708	176.909	0.101638	44.1063	203.678	40.1925	153.504	22.8199	86.5393	151.515	3578.14	12574.9	22416.2	1290.43	1907.53	1392.8	2277.37	19.8101	11.2747	18843.5	1279.14	0.939915	8672.17	15585.1	5218.04	1166.25	16.1742	9.5584	0.804341	112.504	125.437	0	125619	3.72232	4.14641	3.30217	4.13199	5.72542
	16790	642.337	38.0512	481.234	657.899	18.4759	76.3836	16.2699	88.5241	567.72	393.731	761.317	176.811	0.093445	44.3958	203.817	40.7646	152.847	22.796	86.5951	153.587	3640.93	12696.7	23652.9	1284.51	1919.54	1697.8	2337.55	19.8657	11.2208	18719.2	1694.81	1.44005	8617.76	15772.9	5302.43	706.591	16.0199	6.20704	0.737776	74.4006	109.937	0	118432	3.92138	4.13434	3.3031	4.12852	5.76755
	17155	680.584	38.0572	481.085	657.343	18.6105	75.8845	16.3063	88.5161	568.216	393.616	763.558	176.805	0.085893	44.7098	204	41.2221	152.489	22.8142	86.7019	155.858	3721.26	12773.7	23839	1286.29	1899.86	1674.61	2406.95	19.7907	11.1645	19724.9	1421.14	0.924246	8531.5	15647	5321.35	1127	15.7643	8.96302	0.787918	106.046	123.285	0	118444	4.15487	4.135	3.30207	4.12503	5.80959
	17520	704.219	37.9264	481.243	656.878	18.7389	75.3464	16.3142	88.4929	566.8	393.355	762.043	176.534	0.078905	44.9499	204.162	41.6942	151.949	22.8165	86.8199	158.075	2666.19	11304.2	23986.6	1284.8	1913.09	1641.48	2441.67	19.779	10.9134	20245.4	2092.64	1.21679	8562.77	15788.9	5401.71	839.97	15.3935	7.62899	0.731246	91.1324	122.308	0	118136	4.29916	4.12078	3.30316	4.12211	5.84966
	17885	730.533	38.0078	481.445	656.882	18.8729	74.7812	16.3282	88.7057	565.162	393.295	758.176	175.825	0.07236	45.2193	204.391	42.3649	151.603	22.8318	86.9472	159.912	2385.19	10922.6	24110.7	1281.54	1883.72	1595.23	2451.35	19.9037	10.7576	20373.3	1312.22	1.06622	8507.57	15837.2	5453.36	1197.86	15.1978	8.53199	0.766544	101.994	122.404	0	120254	4.45981	4.12962	3.30455	4.12214	5.89149
	18250	736.239	38.0929	481.363	656.564	19.01	74.2173	16.331	88.9428	564.735	393.228	753.283	175.043	0.066327	45.3433	204.314	42.9145	151.197	22.8437	87.0667	161.716	1566.46	9266.63	24388.2	1269.42	1891.62	1600.58	2447.58	20.0555	10.4751	19639.5	1390.01	1.49103	8523.05	16134.4	5565.02	1066.99	14.9852	8.50326	0.740886	101.274	119.932	0	121093	4.49464	4.13888	3.30398	4.12014	5.93428
	18615	750.464	38.5657	481.616	657.07	19.1432	73.6612	16.3394	89.1327	566.048	393.358	746.815	173.881	0.060629	45.4505	204.442	43.5097	151.077	22.8636	87.2211	163.739	1310.97	8701.94	24598.9	1273.07	1867.08	1573.44	2433.11	20.2601	10.219	21090.4	2306.42	1.53321	8511.03	16303.7	5646.03	729.508	14.7411	6.51824	0.662639	76.9508	122.043	0	121321	4.58148	4.19024	3.30571	4.12331	5.97587
	18980	753.235	38.8955	481.474	657.206	19.2556	73.1218	16.3247	89.1466	566.537	393.353	739.707	172.784	0.055402	45.577	204.365	44.075	150.75	22.8157	87.3254	165.793	1046.47	8185.33	25736.9	1259.48	1853.9	1710.26	2433.4	20.5048	10.0552	20296.7	3728.82	2.33622	8478.19	16736.7	5761.2	356.8	14.4708	4.56409	0.50508	52.9506	115.19	0	116561	4.5984	4.22608	3.30474	4.12417	6.01097
	19345	743.198	39.3589	480.396	656.519	19.3464	72.5299	16.3113	89.3285	566.249	393.51	735.825	171.927	0.050578	45.5539	204.007	44.4154	150.485	22.7341	87.4411	168.065	1059.83	8276.11	26128.2	1246.17	1835.78	1677.77	2446.91	20.6251	10.0136	19648.5	2257.93	1.62034	8391.14	16762.7	5789.9	744.904	14.3939	7.05707	0.724834	83.4379	127.949	0	119277	4.53712	4.27642	3.29735	4.11986	6.03931
	19710	769.325	39.6513	480.011	657.037	19.4372	71.9029	16.2808	89.3781	565.269	393.539	730.705	171.105	0.046019	45.5585	204.143	44.764	150.189	22.6599	87.4878	170.343	704.631	7082.53	26380.7	1252.04	1814.75	1626.14	2448.43	20.6527	9.76817	21811.6	1988.13	1.27317	8376.8	16850.3	5849.61	806.679	14.25	7.05826	0.684692	82.8292	126.602	0	119519	4.69662	4.30819	3.2947	4.12311	6.06766
	20074.5	774.179	40.2714	479.542	657.302	19.5207	71.2013	16.2581	89.669	564.695	393.851	726.668	170.322	0.041782	45.5804	204.246	45.114	150.325	22.6062	87.55	172.35	727.475	7176.59	26674.7	1247.61	1798.15	1595.74	2432.41	20.6927	9.68732	20868.8	2323.24	1.60523	8318.02	16886.7	5889.92	704.013	14.1058	6.6003	0.714672	77.7695	126.716	0	122633	4.72626	4.37558	3.29148	4.12477	6.0937
No Stressors
	0	163.804	9.20369	145.692	159.355	3.20342	101.044	4.00792	63.0406	89.5154	165.653	259.752	55.3802	0.85031	9.58446	77.0309	39.1596	103.822	3.54591	9.29063	69.4644	2624.44	10575	27838.5	1841.96	3023.88	7721.22	1823.99	25.469	17.9517	1017.79	785.199	1727.46	14182	14840.9	2183.71	349.207	149.66	48.9198	4.49054	5589.68	22358.7	0	3991.63	1	1	1	1	1
	365	168.794	16.8446	271.337	321.741	4.23899	91.2898	6.04541	85.7945	130.459	183.062	386.787	73.2801	0.798231	19.6044	116.555	68.8277	149.774	5.26226	13.6578	74.9319	2625.18	10491.9	27044.1	2330.41	3115.6	6478.43	4103.38	18.2901	14.9476	104.433	2907.67	4255.65	14051	15685	2513.3	912.744	3344.65	7.62696	0.281137	91.1904	54.7581	0	16134.6	1.03047	1.8302	1.8624	2.01902	1.32327
	730	173.029	23.7793	418.29	512.071	5.11637	92.4782	7.75027	118.545	187.001	208.101	475.226	93.5472	0.831562	32.3076	152.197	107.289	188.974	6.9603	18.6932	79.404	2636.57	10431.3	26177.7	1919.2	2986.5	4597.51	4952.9	20.6762	14.8312	56.2677	3317.22	3056.82	13891.5	15682.2	2612.17	847.356	2352.13	6.89064	0.401523	82.7414	60.8863	0	22549.2	1.05632	2.58367	2.87106	3.2134	1.59716
	1095	172.19	30.0015	575.912	715.021	5.88166	94.4569	9.54778	149.927	258.629	234.949	540.153	114.983	0.875706	47.2357	183.984	151.933	222.833	8.57494	24.3314	82.7948	2659.69	10411	25552.2	1670.25	2877.45	3431.6	4646.36	20.9255	14.722	40.0116	3103.19	1257.15	13722.6	15565.6	2666.9	1008.35	1900.98	7.4676	0.494406	90.6369	60.6744	0	30543.5	1.0512	3.25973	3.95295	4.48698	1.83606
	1460	177.441	37.9327	737.685	921.079	6.61727	96.617	11.863	173.853	340.246	262.871	611.744	137.835	0.920905	64.0879	211.371	197.673	253.239	10.0847	30.5869	85.504	2686.81	10406.3	25093.1	1531.16	2794.05	2728.58	4136.68	20.9359	14.6232	32.2064	4482.06	546.55	13548.8	15463.7	2722.59	730.598	1620.41	6.13688	0.480759	74.6727	60.3845	0	36878.6	1.08325	4.12147	5.06333	5.78005	2.06569
	1825	183.812	45.4372	890.499	1116.07	7.39626	98.9305	13.9465	194.71	427.184	290.331	676.515	160.852	0.980791	82.0312	235.514	234.744	281.283	11.3894	37.3919	87.8292	2718.58	10417.4	24756	1445.1	2709.31	2234.74	3701.76	20.9222	14.5306	19.3594	3841.17	161.068	13371.4	15373.4	2778.33	803.257	1406.76	6.09304	0.518382	74.513	59.0975	0	43608.7	1.12215	4.93685	6.11221	7.0037	2.30887
	2190	186.698	51.5027	1018.32	1283.56	8.21453	101.519	15.5242	211.483	513.436	317.58	725.374	182.189	1.05242	99.7471	256.586	257.938	306.822	12.527	44.7031	89.8573	2751.71	10429.1	24415.7	1386.97	2630.35	1883.91	3351.52	20.8789	14.4397	13.4219	3267.54	34.4813	13187.3	15281.9	2823.67	970.734	1274.41	6.76032	0.571247	83.6455	59.2399	0	50470.3	1.13977	5.59587	6.98953	8.05472	2.5643
	2555	186.262	56.0502	1107.44	1407.23	9.0767	103.998	16.6946	223.9	591.01	343.253	757.278	200.173	1.15407	115.569	275.103	268.792	329.779	13.5795	52.3871	91.6599	2787.44	10450.4	24168.4	1346.4	2567.96	1660.95	3082.81	20.8289	14.3532	9.2151	3604.25	9.88666	13000.7	15220.3	2875.21	856.92	1123.96	6.35683	0.568005	77.9924	60.2426	0	55672.8	1.13711	6.08997	7.60125	8.8308	2.83344
	2920	170.816	58.6273	1139.65	1460.89	9.96247	106.663	17.4007	232.782	645.795	368.703	773.629	212.539	1.26789	126.328	291.466	264.213	350.672	14.6821	60.3034	93.3026	2824.53	10472.5	23889.3	1316.27	2503.68	1473	2871.26	20.7583	14.2677	7.23515	3091	2.88032	12811.3	15148.6	2920.22	970.381	1024.32	6.83643	0.585143	83.5474	60.4588	0	61879.1	1.04281	6.36998	7.82236	9.16754	3.10995
	3285	136.097	59.1715	1090.03	1410.31	10.8515	108.843	17.4552	238.11	652.804	391.837	775.701	216.418	1.39104	127.313	304.876	237.021	368.943	15.8942	68.326	94.8484	2863.09	10503.4	23662.6	1295.25	2469.4	1386.14	2702.24	20.6917	14.1849	6.70252	6466.39	3.63815	12623.3	15117.9	2976.67	541.126	898.543	4.95941	1.00383	63.8051	94.7283	0	64090.4	0.830852	6.42911	7.48178	8.85012	3.38747
	3650	80.7973	58.4524	923.825	1210.21	11.7792	111.144	16.7662	239.643	652.508	414.889	765.325	208.358	1.52537	111.555	315.89	182.154	383.884	17.2533	76.2479	96.3657	2907.14	10559.6	23535.8	1276.54	2419.92	1287.41	2579.81	20.6737	14.1127	4.24956	4086.37	2.16954	12435.2	15123.4	3044.95	794.548	767.284	6.11317	0.67906	75.5208	69.6719	0	70156.9	0.493256	6.35097	6.34095	7.59443	3.67708
	4015	79.7416	58.3386	889.652	1170.66	12.7414	112.494	17.1944	237.738	629.334	434.913	773.855	216.008	1.66962	110.988	324.051	146.483	395.758	18.0771	83.8323	97.7798	2951.67	10609.2	23347.5	1262.99	2374.74	1211.69	2479.63	20.6645	14.0357	3.59225	3101.15	1.67419	12248.3	15161.6	3131.52	939.342	608.958	6.61099	0.608906	81.2577	62.2084	0	75044	0.486812	6.33861	6.1064	7.34625	3.97744
	4380	77.5669	57.7146	840.568	1128.46	13.726	113.989	17.2817	237.228	622.518	454.903	777.045	221.716	1.82121	108.518	330.795	119.4	405.477	18.7821	91.3047	99.1054	2990.37	10650.4	23110.5	1254.51	2335.61	1161.6	2398.71	20.5996	13.9539	3.97636	3659.62	1.90734	12063.1	15122.3	3197.91	935.186	372.219	6.87963	0.720768	85.0351	67.8608	0	79581.2	0.473535	6.27081	5.7695	7.08141	4.28481
	4745	76.4829	56.8955	782.303	1080.17	14.7569	113.952	17.2385	236.595	616.671	470.664	777.278	224.787	1.96037	104.053	334.258	104.546	411.96	19.3973	98.1696	100.302	3033.61	10695	22907.8	1248.18	2297.15	1110.52	2335.3	20.5345	13.8718	4.16781	3053.81	2.10896	11881.7	15102.9	3263.61	1019.98	207.347	7.38611	0.694431	90.6642	65.8008	0	84338.9	0.466918	6.18182	5.36958	6.7784	4.60661
	5110	76.3804	55.595	727.843	1036.15	15.8215	114.17	17.1994	234.885	610.543	486.028	774.841	227.013	2.11159	98.9082	335.876	97.272	416.442	19.923	105.046	101.391	3014.91	10709.1	22641.7	1242.63	2256.52	1057.86	2282.4	20.4621	13.7797	5.39628	2518	1.47563	11702.3	15064.3	3316.86	1142.9	137.301	7.776	0.657037	94.4649	63.8249	0	89603.8	0.466292	6.04052	4.99577	6.50214	4.93895
	5475	82.2079	54.5876	681.412	1000.26	16.952	112.068	17.1248	233.824	604.78	495.445	774.72	229.036	2.27294	93.6228	333.192	93.3147	419.638	20.4017	110.675	102.471	3069.09	10792.9	22653.4	1238.2	2271.11	1104.27	2255.12	20.4254	13.6991	157.126	3564.37	1.93676	11528.5	15096.9	3396.76	856.837	105.756	6.53667	0.668267	80.166	69.1634	0	91035.1	0.501868	5.93106	4.67708	6.27695	5.29185
	5840	84.3862	53.8884	641.711	970.329	18.14	110.332	17.0066	233.323	599.551	505.609	776.767	230.631	2.44644	88.3739	330.005	89.6539	419.361	20.8573	116.645	103.593	3116.02	10850	22454.3	1235.65	2234.95	1063.43	2236.64	20.3557	13.6155	7.64552	2629.48	1.62472	11364.4	15065	3450.75	1457	94.6877	9.13404	0.831648	114.226	70.9231	0	95881.9	0.515166	5.85509	4.40458	6.08911	5.66271
	6205	85.127	53.1736	608.713	945.496	19.3729	104.959	16.857	232.785	594.982	508.342	778.969	231.724	2.63254	83.207	321.56	85.1032	417.739	21.2818	120.176	104.703	3164.45	10901.3	22240.6	1236.88	2204.51	1034.18	2219.65	20.2968	13.5308	12.2569	2525.43	1.96379	11208.6	15051.7	3509.24	1236.89	81.3882	8.82875	0.763283	106.972	70.0253	0	100574	0.519689	5.77742	4.17809	5.93327	6.04756
	6570	90.2684	52.7374	582.768	927.009	20.6793	100.126	16.7676	232.59	591.82	512.44	782.177	232.419	2.82809	78.4324	315.118	79.6371	414.622	21.661	125.483	105.834	3214.91	10961.2	22327.9	1239.12	2217.39	1094.64	2221.17	20.2585	13.4527	18.7894	3016.75	2.04563	11056.3	15075	3572.55	1031.64	65.7483	7.74156	0.721552	94.5308	71.5008	0	102745	0.551076	5.73003	4	5.81726	6.45538
	6935	90.1944	52.1013	561.948	912.599	21.9325	89.4615	16.6729	231.847	589.46	509.118	783.304	232.78	3.01284	74.2722	303.143	73.6594	406.205	21.9899	129.384	106.838	3267.45	11014.7	22116.1	1240.42	2185.27	1061.61	2224.31	20.1653	13.3651	32.24	2615.32	1.78475	10905.2	15001.2	3609.11	1238.13	50.3464	9.0954	0.795714	110.435	72.8202	0	107321	0.550624	5.66092	3.8571	5.72684	6.8466
	7300	93.107	51.0405	545.927	901.134	23.2066	82.0243	16.601	230.238	587.422	509.193	781.096	232.86	3.2042	70.3769	299.101	67.9383	395.937	22.2635	134.092	107.775	3331.52	11107.8	22074.6	1239.35	2173.34	1105.79	2236.18	20.1041	13.282	56.8346	3218.23	2.1741	10761.7	15021.4	3669.51	957.227	39.291	7.11323	0.678486	86.7849	72.7227	0	109326	0.568405	5.54566	3.74714	5.65489	7.24431
	7665	87.8903	49.9508	531.972	890.704	24.4837	76.8197	16.5632	228.5	585.456	507.162	778.105	233.011	3.40067	67.071	294.879	63.3306	384.805	22.476	137.711	108.707	3396.52	11188.7	21852.1	1236.75	2141.5	1068.02	2246.34	20.0142	13.1962	116.362	2302.5	1.33521	10618.5	14938.9	3699.58	1251.82	32.6732	8.2708	0.674697	99.2045	70.5934	0	113645	0.536558	5.42726	3.65135	5.58944	7.64299
	8030	88.4386	48.8724	520.691	882.544	25.6261	75.3165	16.5642	226.402	583.061	504.269	773.119	233.009	3.5867	64.2554	291.017	59.9297	365.959	22.6287	140.719	109.495	3406.72	11278.3	21983.6	1231.91	2136.3	1173.25	2275.09	19.9607	13.1126	220.05	2619.31	1.56866	10484.1	14967.7	3756.13	1221.33	28.0635	8.04618	0.793689	99.2406	75.5823	0	113918	0.539906	5.31009	3.57392	5.53824	7.9996
	8395	84.2861	48.4568	511.351	875.651	26.7836	74.6686	16.614	225.654	583.779	501.729	772.59	233.222	3.77895	61.7263	287.908	57.5148	347.524	22.7874	143.422	110.384	3468.87	11346.1	21807.3	1233.61	2111.94	1149	2288.19	19.8496	13.0244	464.382	2872.99	2.01748	10350.3	14888.4	3781.05	1774.19	25.1266	10.8766	0.942185	133.401	84.6375	0	116256	0.514555	5.26494	3.50981	5.49498	8.36095
	8760	86.1269	47.5415	502.9	869.411	27.933	74.186	16.6267	223.7	584.76	498.509	767.129	233.336	3.97775	59.7304	284.783	55.8026	329.357	22.8318	145.526	111.191	3526.08	11442.3	21773.7	1227.6	2090.58	1173.42	2313.72	19.7934	12.9422	795.024	2126.93	1.41799	10223.7	14886.2	3823.41	1180.58	23.0184	8.10999	0.682715	97.5913	75.3857	0	119003	0.525793	5.16548	3.45181	5.45582	8.71976
	9125	85.0707	46.5287	494.171	862.84	28.9867	73.7961	16.6065	221.576	583.137	494.97	760.469	233.429	4.16405	57.9696	281.449	54.3742	306.486	22.7963	147.189	111.864	3601.06	11532.7	21601.7	1225.11	2062.45	1146.98	2322.59	19.6905	12.8536	1280.01	3013.35	1.1041	10098.7	14826.7	3847.4	1160.25	21.2265	10.5764	1.17792	128.694	87.2694	0	120735	0.519345	5.05545	3.39189	5.41459	9.04867
	9490	88.0505	45.7466	485.937	856.444	30.037	73.4835	16.5922	220.116	580.038	491.71	755.756	233.576	4.36217	56.411	278.441	53.0159	294.721	22.729	148.594	112.621	3676.16	11629.1	21455.2	1220.46	2038.49	1114.18	2316.54	19.6282	12.7686	1758.9	2814.59	1.62037	9979.15	14832.1	3884.31	1101.42	19.8953	9.09762	0.853072	110.676	84.8865	0	122947	0.537536	4.97046	3.33538	5.37445	9.37655
	9855	93.2051	44.9546	478.49	850.271	31.0781	73.24	16.5818	218.741	575.264	488.567	751.559	233.637	4.57294	54.914	275.646	51.6142	283.661	22.6722	149.706	113.226	3753.15	11732	21325.8	1212.91	2017.76	1083.98	2302.04	19.5934	12.6866	2239.93	2811.2	1.47415	9859.53	14857	3922.68	1074.8	18.7428	8.97277	0.91545	109.239	88.0646	0	124391	0.569004	4.88441	3.28426	5.33571	9.70155
	10220	98.0017	44.4822	471.701	844.844	31.9676	73.0329	16.6331	218.52	570.525	486.362	752.955	233.749	4.77011	53.5712	273.342	50.0577	274.814	22.6485	150.701	113.944	3827.36	11826.2	21198.7	1208.03	1999.73	1058.85	2279.95	19.5539	12.6057	2730.94	2167.68	1.64573	9738.37	14882.7	3962.74	1175.05	17.7772	8.43832	0.756203	101.528	85.2742	0	126491	0.598287	4.83308	3.23766	5.30165	9.97922
	10585	104.008	43.9095	465.339	839.91	32.7438	72.8474	16.7048	218.187	567.847	484.505	754.815	233.815	4.99604	52.4732	271.278	48.341	266.586	22.6226	151.314	114.662	3900.47	11907.4	21105.9	1205.51	1982.37	1058.02	2262.41	19.5062	12.5247	3308.89	2197.27	1.51668	9619.23	14884	3998.37	1425.71	16.9135	11.3896	1.07227	138.541	91.5717	0	127841	0.634954	4.77086	3.194	5.27069	10.2215
	10950	111.916	43.3004	459.47	834.904	33.3772	72.6703	16.7549	217.777	566.572	482.964	756.408	233.806	5.24897	51.5721	269.404	46.4689	259.248	22.6115	151.84	115.389	3974.32	11983.3	20934.3	1204.78	1961.91	1032.24	2247.67	19.4649	12.4416	4521.37	1465.24	1.0669	9525.94	14892.4	4033.77	1363.56	16.5033	9.30722	0.819374	113.469	91.0644	0	130717	0.68323	4.70468	3.15372	5.23928	10.4192
	11315	159.908	42.7198	456.25	834.259	33.6926	72.7359	16.8268	217.674	566.63	481.87	758.728	233.872	5.43561	51.1686	267.736	44.7682	252.789	22.6266	152.294	116.137	4052.2	12069.1	20796.4	1225.02	1949.15	1012.32	2225.99	19.4868	12.3604	6592.94	1434.34	0.956291	9504.56	14959.7	4080.77	1054.58	16.2449	8.17126	0.727622	97.8309	94.561	0	131010	0.976218	4.6416	3.13161	5.23523	10.5177
	11680	181.554	42.1965	452.751	832.709	33.5942	73.314	16.9235	217.854	564.728	481.299	762.083	234.132	5.66722	50.8837	266.178	43.2407	247.323	22.6241	152.734	116.79	4143.07	12198.1	21527.2	1217.82	1984.97	1231.62	2243.38	19.6557	12.2894	7293.28	2261.22	1.50952	9542.92	15258.3	4176.01	680.729	15.9027	6.13997	0.795135	75.0812	98.343	0	125863	1.10836	4.58474	3.10759	5.2255	10.487
	12045	191.636	41.6569	449.272	830.295	33.3911	74.18	17.0272	218.206	562.119	481.094	765.358	234.498	5.92139	50.4855	264.548	41.8491	242.689	22.6542	152.992	117.501	4229.86	12297	21510.5	1208.55	1967.39	1215.86	2274.79	19.7349	12.2148	8272.14	1516.36	0.928469	9509.08	15305.8	4231.37	955.69	15.5041	7.71059	0.703425	92.4889	94.0843	0	127686	1.16991	4.52611	3.08371	5.21035	10.4236
	12410	244.59	41.2566	446.934	829.376	33.3294	74.9706	17.1268	218.557	562.922	480.757	768.19	234.895	6.18503	50.3394	263.117	40.9089	238.882	22.6854	152.904	118.275	4313.14	12379.1	21418	1237.59	1951.94	1181	2279.61	19.76	12.1377	10624.2	2627.82	1.39702	9435.15	15371.7	4300.79	2138.36	15.3172	12.2433	2.48791	160.947	143.363	0	126037	1.49319	4.48262	3.06767	5.20459	10.4043
	12775	287.317	40.6285	444.915	830.199	33.4179	75.5738	17.1942	218.459	563.15	480.317	768.856	235.176	6.46371	50.6365	261.574	40.625	235.903	22.68	152.708	119.053	4390.09	12494.8	21493.9	1232.42	1959.53	1198.34	2276.01	19.8825	12.0682	11203.3	1691.32	0.903271	9359.11	15565.2	4421.76	972.325	15.1465	8.43079	0.838336	100.431	106.54	0	127965	1.75403	4.41438	3.05381	5.20975	10.432
	13140	315.542	40.3155	442.678	829.792	33.5033	76.0941	17.2625	218.944	563.763	480.027	771.68	235.598	6.75279	50.7934	260.381	40.3651	233.907	22.683	152.592	120.016	4486.66	12619	21639.8	1238.98	1982.38	1223.16	2272.09	20.0637	12.0041	11881.2	1920.4	1.19305	9296.98	15907.9	4601.1	733.935	15.1407	6.75866	0.554971	80.1742	97.3333	0	127601	1.92634	4.38037	3.03845	5.2072	10.4586
	13505	347.973	39.958	440.389	828.566	33.5789	76.4604	17.3104	219.144	562.836	479.703	772.937	235.805	7.05247	50.8016	259.318	40.1258	232.368	22.6733	152.544	120.683	3842.77	12103.9	21713.9	1227.23	1965.95	1211.44	2265.01	20.1302	11.8564	13052.9	1176.16	0.755785	9217.27	15947.1	4733.95	1069.01	15.1213	8.44582	0.729262	100.611	103.996	0	128076	2.12432	4.34152	3.02274	5.1995	10.4822
	13870	424.784	39.6911	439.206	829.426	33.7379	76.7179	17.3431	219.211	560.755	479.6	772.952	235.654	7.35598	51.1305	258.5	40.2553	231.215	22.661	152.798	121.376	3925.89	12198.3	21751.6	1270.38	1953.51	1218.07	2251.36	20.126	11.7738	15165.6	2696.97	1.36905	9145.8	15937	4850.07	685.671	14.8374	7.23427	0.736231	86.5958	114.597	0	126949	2.59325	4.31253	3.01463	5.2049	10.5318
	14235	474.568	39.6446	438.01	829.482	33.8571	76.8531	17.3931	219.897	559.832	479.844	775.811	235.71	7.6621	51.4477	258.045	40.2104	230.739	22.6799	153.07	122.251	3975.54	12263.1	21756.9	1267.8	1933.21	1188.44	2238.17	20.085	11.7046	15817.7	1402.06	0.848011	9061.18	15844.7	4916.33	1181.68	15.3631	9.66166	0.907808	115.701	119.154	0	129293	2.89717	4.30746	3.00641	5.20525	10.5691
	14600	516.939	39.503	437.419	829.493	33.9657	76.8475	17.4212	220.234	558.863	480.083	777.315	235.673	7.97124	51.5768	257.855	40.0175	230.633	22.7245	153.157	123.161	3826.18	12291.4	21879.3	1274.2	1940.88	1169.23	2228.75	20.0752	11.6243	16608	1316.71	0.844661	8994.41	15874	4982.14	1147.82	15.3111	9.69137	0.936017	116.629	122.156	0	129992	3.15584	4.29209	3.00236	5.20532	10.603
	14965	566.344	39.1811	437.648	830.399	34.0669	76.6817	17.4349	219.995	557.877	480.012	776.394	235.472	8.27893	51.7394	257.57	39.9157	230.227	22.7576	153.326	124.028	3480.18	12269.8	21930	1300.18	1920.09	1149.16	2215.68	20.0384	11.531	17757.4	1103.11	0.732644	8921.89	15833.3	5024.02	1088.52	15.5049	8.41765	0.699697	99.7751	111.503	0	130797	3.45745	4.25711	3.00393	5.21101	10.6346
	15330	604.179	38.8905	437.527	830.324	34.0977	76.3752	17.436	219.65	556.801	479.588	774.572	235.148	8.58533	51.7667	257.237	39.7295	229.835	22.7635	153.559	124.931	3545.74	12349.8	21989.7	1299.2	1917.95	1136.16	2199.87	19.9742	11.4585	18975.8	2804.19	1.4849	8848.54	15780.8	5060.36	734.794	15.3018	12.114	4.11926	164.217	217.69	0	129215	3.68843	4.22554	3.0031	5.21053	10.6442
	15695	641.96	38.748	437.315	829.484	34.0815	75.9974	17.4514	219.74	555.88	479.588	774.926	234.971	8.89416	51.7608	257.108	39.648	229.446	22.7878	153.889	125.628	3627.32	12439	22072.6	1301.47	1918.3	1121.77	2181.69	19.9357	11.3958	18708.4	1881.64	1.00224	8772.22	15739.3	5102	947.088	15.1863	8.12314	0.749715	96.1707	117.769	0	130334	3.91908	4.21005	3.00164	5.20526	10.6391
	16060	676.052	38.6317	437.216	828.739	34.0535	75.581	17.4675	219.84	555.776	479.609	775.606	234.832	9.20429	51.6972	257.051	39.5066	229.158	22.7944	154.108	126.412	3658.53	12539.6	22963.3	1296.89	1926.44	1294.56	2197.47	19.9488	11.3359	19462.6	3163.71	1.53384	8717.79	15896.9	5181.88	480.697	14.7321	5.04667	0.553688	60.1936	109.362	0	124826	4.1272	4.19742	3.00097	5.20059	10.6304
	16425	692.433	38.5179	436.661	826.564	33.9994	75.0716	17.4981	219.997	556.179	479.643	776.713	234.738	9.51896	51.495	256.646	39.2632	228.931	22.7658	154.095	127.253	3567.1	12574.7	23121.6	1285.71	1908.86	1279.68	2231.61	19.9553	11.2683	18832.4	1423.99	0.951396	8630.33	15836.7	5219.56	1086.32	14.5449	8.39117	0.762782	99.8743	117.027	0	127107	4.22721	4.18505	2.99716	5.18694	10.6135
	16790	726.456	38.423	436.48	825.452	33.9483	74.5571	17.5274	220.046	555.786	479.526	777.337	234.621	9.83156	51.3553	256.679	39.0631	228.94	22.7291	154.084	128.19	3619.49	12643.7	23204.8	1294.44	1902.54	1257.37	2252.4	19.8716	11.2052	20754.3	2167.53	1.62798	8556.81	15749.3	5250.28	2474.15	14.1993	11.8638	1.93758	150.016	154.073	0	124576	4.43491	4.17474	2.99591	5.17997	10.5975
	17155	746.019	38.4326	436.244	824.032	33.8997	73.9892	17.5698	220.377	556.076	479.451	779.338	234.631	10.147	51.2329	256.706	39.173	229.037	22.7322	154.131	129.252	3700.64	12725.3	23326.3	1287.73	1917.81	1240.07	2259.25	19.822	11.1504	20030.5	1190.97	0.876392	8486	15714.5	5284.93	1212.32	14.0221	9.26904	0.812506	109.682	124.783	0	128394	4.55434	4.17578	2.99429	5.17105	10.5824
	17520	741.388	38.3077	435.792	822.528	33.8464	73.4119	17.5783	220.119	554.623	479.262	777.937	234.285	10.4601	51.0727	256.639	39.3199	228.676	22.7161	154.163	130.297	2653.97	11272.4	23494.2	1283.67	1934.32	1228.66	2255.42	19.8844	10.9041	19411.4	1738.96	1.08486	8527.54	15948.5	5380.99	941.574	13.7459	7.298	0.780022	88.3109	119.784	0	128642	4.52607	4.16221	2.99119	5.16162	10.5657
	17885	762.845	38.3892	435.593	822.109	33.7866	72.8399	17.5843	220.143	552.916	479.285	774.386	233.366	10.7717	50.9392	256.815	39.5604	228.49	22.7179	154.189	131.083	2373.81	10891.9	23612.5	1290.38	1915.92	1210.73	2249.87	20.0229	10.7495	21523.4	2451.92	1.65307	8484.34	16011.6	5434.31	1892.4	13.4875	11.1931	1.43534	137.256	145.934	0	126743	4.65706	4.17107	2.98983	5.15898	10.5471
	18250	771.65	38.4692	435.471	821.754	33.7639	72.2512	17.5709	220.044	552.369	479.311	769.65	232.383	11.0855	50.8324	256.739	39.7837	228.257	22.7205	154.185	131.867	1559.91	9241.71	23850.2	1279.13	1913.58	1213.3	2243.43	20.1884	10.4674	20640.7	1761.37	1.61352	8495.46	16296.3	5543.64	1011.64	13.4664	9.2628	0.83492	109.129	129.918	0	129279	4.71082	4.17976	2.98899	5.15676	10.54
	18615	756.399	38.9271	435.342	822.032	33.7512	71.6947	17.5604	220.505	553.498	479.666	763.328	231.083	11.3993	50.7316	256.631	39.9726	228.337	22.7301	154.332	132.832	1307.58	8701.35	24635.5	1271.24	1901.04	1313.57	2242.91	20.4862	10.2195	19747	3491.71	2.09421	8490.39	16743.8	5674.24	467.237	13.107	5.2227	0.538465	62.141	116.142	0	126670	4.61771	4.22952	2.9881	5.1585	10.536
	18980	765.895	39.2433	435.093	822.585	33.716	71.1056	17.5284	220.674	553.811	479.891	756.486	229.924	11.7137	50.5936	256.554	40.0708	228.211	22.6763	154.462	133.835	1044.85	8177.99	24951	1268.18	1877.74	1291.16	2257.33	20.7011	10.0511	21858.2	2115.82	1.57714	8428.07	16880.7	5731.11	787.196	12.9822	7.11808	0.776143	84.3095	129.357	0	126710	4.67568	4.26387	2.98639	5.16197	10.525
	19345	772.73	39.685	434.544	822.377	33.6375	70.3919	17.5038	221.217	553.139	480.21	752.302	229.014	12.0257	50.4549	256.447	40.0239	228.15	22.5969	154.495	134.991	1057.03	8252.33	25167.2	1261.76	1853.81	1258.98	2259.52	20.7161	9.9994	21332.9	1818.38	1.47111	8362.8	16882.6	5763.77	882.668	12.8692	8.70501	0.797331	101.872	136.322	0	129579	4.71741	4.31186	2.98262	5.16067	10.5005
	19710	787.588	39.9433	434.378	822.707	33.5618	69.66	17.4646	221.239	551.939	480.451	747.05	228.144	12.3374	50.3548	256.601	39.9271	227.893	22.5206	154.45	136.199	703.456	7072.8	26100	1262.59	1850.27	1373.96	2263.2	20.8061	9.75513	21951	5381.04	2.35387	8370.22	17169.1	5859.04	274.319	12.4791	3.71191	0.446966	42.2789	121.167	0	123336	4.80812	4.33992	2.98148	5.16274	10.4769
	20074.5	781.73	40.5405	434.06	822.869	33.4883	68.9297	17.4477	221.992	551.361	481.022	743.395	227.361	12.6514	50.2293	256.569	39.8329	228.052	22.4622	154.457	137.247	728.279	7188.6	26501.6	1250.14	1833.92	1334.25	2287.56	20.9962	9.6833	21032.6	2009.19	1.53416	8288.4	17315.2	5906.12	704.419	12.5995	6.38422	0.68991	74.8071	125.507	0	127805	4.77235	4.40481	2.9793	5.16375	10.4539
[truncated: 45 more columns]
